# Supplementary material for: Insights of the dental calculi microbiome of pre-Columbian inhabitants from Puerto Rico
Source: PeerJ. 2017 May 2;5:e3277. doi: 10.7717/peerj.3277 (PMC5417066; doi:10.7717/peerj.3277)
Supplement: Data S5 — Dental Calculi Genus Level [file peerj-05-3277-s012.xls]

## Sheet: table_mc2031_sorted_L6
Genus	Soil.DNA	D.21	E.19	E.26	F.20	G.18	G.21	G.22	I.19	I.23A	I.23B	I.24A	I.24B	Calculi.F24.DNA	Calculi.H6.DNA	Calculi.M8.DNA	Supragingival1	Supragingival2	Supragingival3	Supragingival4	Subgingival1	Subgingival2	Subgingival3	Subgingival4	Saliva1	Saliva2	Saliva3	Saliva4	1b	2b	3b	5b	7b	S4	S5	S13	S14	S16	Control.1
Bacillus	0.51423	0.0575271	0.136691	0.22417	0.0206278	0.00433475	0.00352878	0.0757605	0.332955	0.130776	0.0979813	0.119529	0.163723	0.253245	0.975523	0.170732	0	0.000116877	0	0	0	0	0	0	0.000249657	0	0	0	0.0323604	0.00708094	0.0371216	0.00151286	0.00352897	2.82574e-05	1.3458e-05	2.83923e-05	3.85219e-06	0.000344682	0.0209642
Unclassified	0.245326	0.0100859	0.00719424	0.00202259	0.00538117	0	0.00069755	0.00248709	0.00624468	0.0181518	0.0123092	0.0136471	0.051271	0.247587	0.00918535	0.0307136	0	0	0.000201207	0	0	0	0	0	0	0	0	0	0.382272	0.230013	0.350303	0.208126	0.306302	0	0	0	0	0	0.0117178
Unclassified	0.035389	0.000373552	0	0	0.000298954	0	0.000205162	0.000191314	0.000283849	0.000825083	0.000492368	0.000941176	0.000430849	0.00432612	1.76982e-05	0	0	0	0	0	0	0	0	0	0	0	0	0	0.0186754	0.00327582	0.003585	0.00453858	0.00634756	0	0	0	0	0	0.000610607
Unclassified	0.0308564	0.0127008	0.00185658	0.038092	0.00239163	0.000349577	0.000328259	0.00114789	0.00283849	0.00453795	0.0108321	0.0315294	0.0163723	0.00665557	0.0010088	0.000451671	0	0	0	0	0	0	0	0	0	0	0	0	0.000419358	0.0120976	0.00444295	0.0028096	0	0	0	0	0	6.21048e-07	0.000145383
Unclassified	0.0297233	0.000373552	0	0	0.000298954	6.99154e-05	8.20647e-05	0.00286971	0.0011354	0.00123762	0.000492368	0	0	0.00199667	0	0	0	0	0	0	0	0	0	0	0	0	0	0	0.226257	0.395409	0.128616	0.575967	0.307345	0	0	0	0	0	0.0075599
Unclassified	0.0275877	0.00112066	0	0.000168549	0.00209268	6.99154e-05	0.00102581	0.00440023	0.00170309	0.000825083	0.000984737	0	0.000430849	0	0	0	0	0	0	0	0	0	0	0	0	0	0	0	0.000377422	0.000258772	0.000153205	0	0.00306302	0	0	0	0	0	2.90765e-05
Unclassified	0.023273	0.0466941	0.0591785	0.077701	0.0666667	0.0151017	0.864716	0.0459154	0.0249787	0.0915842	0.0891187	0.0607059	0.0521327	0.00332779	1.76982e-05	0	0	0	0	0	0	0.000382702	0	0	0.000124828	0	0	0.000202143	0.00132797	0.000370514	0.000720064	0	6.87461e-05	0	2.33744e-05	1.15672e-05	3.13678e-05	2.67051e-05	0.0106711
Unclassified	0.00897799	0	0	0	0	0	0	0	0	0	0	0	0	0	0	0	0	0	0	0	0	0	0	0	0	0	0	0	1.39786e-05	0	0	0	0	0	0	0	0	6.21048e-07	0
Unclassified	0.00780126	0.000747105	0.00278487	0.00320243	0.000597907	0	0	0.000765257	0.00170309	0.00330033	0.00590842	0.00329412	0.00344679	0.237271	0.00320337	0.0903342	0	0	0	0	0	0	0	0	0	0	0	0	0.000964522	0.000129386	0.00496384	0.00324184	2.29154e-05	6.69253e-06	2.19578e-05	1.05157e-05	6.05344e-06	0.00010682	0.0019772
Cystobacter	0.00710394	0	0	0	0	0	0	0	0	0	0	0	0	0.000665557	0	0	0	0	0	0	0	0	0	0	0	0	0	0	0	0	0	0	0	0	0	0	0	0	0
Unclassified	0.0057093	0.00635039	0.00997911	0.00623631	0.00747384	0.0315318	0.00233885	0.00191314	0.00198694	0.0049505	0.00640079	0.00941176	0.0133563	0.00133111	3.53964e-05	0.0144535	0	0	0	0.0104345	0.000535045	0	0.00222755	0.000633179	0.00162277	0	0	0	0.000447315	0.000194079	0.0212036	0.000324184	0.00274221	1.56159e-05	4.10823e-05	0.000146168	0.000294968	0.00287235	0.0374796
Paenibacillus	0.00475049	0.0366081	0.028777	0.0453396	0.0289985	0.00146822	0.000943745	0.0139659	0.048822	0.0779703	0.130478	0.0376471	0.130978	0.0326123	0.000318567	0.00135501	0	0	0	0	0	0	0	0	0	0	0	0	0.00462691	0.00734559	0.0163317	0.00075643	0.00824953	0	7.08316e-07	0	5.50313e-07	0	0.00465224
Brevibacillus	0.00435825	0.00298842	0.00116036	0.00168549	0.00179372	0.000139831	0.000164129	0.0013392	0.00369004	0.0127888	0.0329887	0.00141176	0.00387764	0	0	0	0	0	0	0	0	0	0	0	0	0	0	0	0.00048925	0.000429326	0	0.000216123	0	0	7.08316e-07	4.20627e-06	1.10063e-06	6.21048e-07	0.000494301
Unclassified	0.00305077	0.0201718	0.022279	0.00219113	0.106726	0.000419492	0.00209265	0.0132007	0.00823162	0.0115512	0.0103397	0.0155294	0.00818613	0.0199667	3.53964e-05	0.102981	0	0	0	0.000189717	0	0	0	0.00021106	0	0	0	0	0.000922587	0.00139384	0	0	0.00140548	0	0	0	0	0	0.000261689
Unclassified	0.00292003	0.00112066	0.00649803	0.000168549	0.000298954	0	0	0.000191314	0.000283849	0.000825083	0.000492368	0.00141176	0.000430849	0	0	0	0	0	0	0	0	0	0	0	0	0	0	0	0.0398669	0.0104038	0.00369224	0.00367409	0.00181031	0	0	0	0	0	0.000319842
Unclassified	0.00278928	0.0112066	0.00348109	0.00117984	0.000597907	0	0.00102581	0.0162617	0.00794777	0.00330033	0.00689316	0.00141176	0.00129255	0.0129784	1.76982e-05	0	0	0	0	0	0	0	0	0	0	0	0	0	0.00222259	0.00207017	3.0641e-05	0.00075643	0.00235264	0	0	0	0	0	0.000930449
Pseudomonas	0.0024842	0.0478147	0.0440938	0.102646	0.137519	0.365448	0.00508801	0.0329061	0.0249787	0.049505	0.0320039	0.0437647	0.0448083	0.000998336	0.00265473	0.215447	0	0	0	0	0	0	0	0	0	0	0	0	0	0	3.0641e-05	0	0.0003972	0.000127902	3.39992e-05	3.1547e-06	3.24685e-05	0.000647753	0.0545185
Pedomicrobium	0.00239704	0	0	0	0	0	0	0	0	0	0	0	0	0.000332779	0	0	0	0	0	0	0	0	0	0	0	0	0	0	0	0	0.00124096	0	0	0	0	0	0	0	8.72296e-05
Unclassified	0.00239704	0.0444527	0.0334184	0.00623631	0.0119581	0.000769069	0.0165771	0.0985269	0.0610275	0.0156766	0.0329887	0.04	0.0133563	0.00399334	3.53964e-05	0.0248419	0.000296648	0	0	0.000948587	0.000267523	0	0	0.000422119	0.00411934	0	0	0	0.00247421	0.0029053	0.000214487	0.00216123	0.0187982	0	0	0	0	0	0.00075599
Unclassified	0.00187405	0	0	0	0	0	0	0.000382629	0	0	0	0	0	0.000332779	1.76982e-05	0	0	0	0	0	0	0	0	0	0	0	0	0	1.39786e-05	0	1.53205e-05	0	0	0	0	0	0	0	0
Unclassified	0.00178688	0.0377288	0.00278487	0.00168549	0.00239163	0.000349577	0.001272	0.0212359	0.0107863	0.00577558	0.00787789	0.0174118	0.0112021	0.00232945	0	0	0	0	0	0	0	0	0	0	0	0	0	0	0.00103442	0.000305821	0.00137885	0.000432246	0.000809676	0	0	0	0	0	0.000494301
Unclassified	0.00169972	0	0	0	0	0	0	0	0	0	0	0	0	0	0	0	0	0	0	0	0	0	0	0	0	0	0	0	0.00640219	0.00450498	0.00242064	0.00129674	0.0163769	0	0	0	0	0	0
Acinetobacter	0.00165613	0.000747105	0.000696217	0.000842744	0.000896861	6.99154e-05	0.000205162	0.000765257	0.0011354	0.000412541	0.000492368	0.000941176	0.000430849	0.00166389	0	0	0	0	0	0	0	0	0	0	0	0	0	0	0.00901619	0.0313467	0.142358	0.0155608	0.0348466	4.98222e-05	1.84162e-05	1.26188e-05	2.14622e-05	0.000251525	0.0444289
Rhodoplanes	0.00156897	0.00560329	0.00139243	0.000842744	0.000896861	0.000699154	0.000943745	0.0126267	0.00340619	0.00123762	0.00590842	0.00235294	0.00129255	0.000332779	0	0	0	0	0	0	0	0	0	0	0	0	0	0	0.000559143	0.00450498	0	0.00162092	0.000190961	0	0	0	0	0	0.000232612
Unclassified	0.00152539	0.00522973	0.00116036	0.000337098	0.00149477	0.000349577	0.000820647	0.0132007	0.00482543	0.00123762	0.00492368	0.000470588	0.00129255	0.00532446	0	0	0	0	0	0	0	0	0	0	0	0	0	0	0.000125807	0	0.000352372	0.000108061	0.000282623	0	0	0	0	0	0.000814143
Unclassified	0.0014818	0.000747105	0.00162451	0.000505646	0.00149477	6.99154e-05	0.000451356	0.00114789	0.00369004	0.000412541	0.000492368	0.00423529	0.000861698	0	0	0	0	0	0.000603622	0	0	0	0	0	0	0	0	0	0.0112667	0.00873943	0.00683295	0.00886103	0.0280255	0	0	0	0	0	0.000377995
Unclassified	0.00113314	0.00821815	0.000232072	0	0.000298954	6.99154e-05	0	0.0026784	0	0.000825083	0.000984737	0	0.00258509	0	0	0	0	0	0	0	0	0	0	0	0	0	0	0	0.000908608	0.000152911	0	0	0	0	0	0	0	0	0
Unclassified	0.00108956	0	0	0	0	0	0	0	0	0	0	0	0	0.00166389	0	0	0	0	0	0	0	0	0	0	0	0	0	0	0.0105119	0.00252891	0.000444295	0.010482	0.0034755	0	0	0	0	0	2.90765e-05
Unclassified	0.00104598	0.000747105	0	0	0	0	0	0	0.000567698	0.000412541	0.000492368	0.000470588	0	0.00232945	0	0.000451671	0	0	0	0	0	0	0	0	0	0	0	0	0.000335486	0.000211722	9.1923e-05	0	0	0	0	0	0	0	0.000348918
Exiguobacterium	0.0010024	0.00261487	0.00394523	0.000168549	0.000298954	6.99154e-05	4.10324e-05	0.000191314	0.000283849	0.00371287	0.0014771	0.00141176	0.00215424	0	0	0	0	0	0	0	0	0	0	0	0	0	0	0	0	0.000235247	0	0	0	0	0	0	0	0	0.000581531
Mycobacterium	0.000958815	0.00522973	0.000464145	0.000505646	0.000896861	0.00174789	4.10324e-05	0.006696	0.00567698	0.000412541	0.0014771	0.00235294	0.00344679	0.0186356	0	0.000451671	0	0	0	0	0	0	0	0	0	0	0	0	0.00334088	0.00179964	0	0	0.000244431	0	0	0	0	0	0.000261689
Unclassified	0.000915232	0	0.000232072	0	0	0	0	0	0	0	0	0	0	0.00299501	0.000159284	0	0	0	0	0	0	0	0	0	0	0	0	0	0	0	1.53205e-05	0	0	0	0	0	1.10063e-06	0	0
Unclassified	0.00087165	0	0	0	0	0	0	0	0	0	0	0	0	0	0	0	0	0	0	0	0	0	0	0	0	0	0	0	0.00388605	0.000358752	0.0221841	0	0	0	0	0	0	0	5.81531e-05
Streptomyces	0.000828067	0.0649981	0.0162451	0.00825889	0.00418535	0.000139831	0.00102581	0.0110962	0.0246949	0.0193894	0.0128016	0.0927059	0.0254201	0.000332779	0	0	0	0.000467508	0.000201207	0.000189717	0	0	0	0	0	0	0	0	0.00630434	0.00315819	0.00332455	0.00129674	0.011366	0	0	0	0	0	0.00488486
Unclassified	0.000828067	0	0	0	0	0	0	0	0	0	0	0	0	0	0	0	0	0	0	0	0	0	0	0	0	0	0	0	0	0	0	0	0	0	0	0	0	0	0
Unclassified	0.000828067	0	0	0.000168549	0	0	0	0.000191314	0	0	0	0	0	0.000332779	0	0	0	0	0	0	0	0	0	0	0	0	0	0	0.00258604	0.00879824	0	0.00389021	0.000519415	0	0	0	0	0	0.000610607
Unclassified	0.000784485	0.000373552	0	0.000168549	0	0	4.10324e-05	0.000382629	0	0.000412541	0	0	0	0.00332779	0	0	0	0	0	0	0	0	0	0	0	0	0	0	0	0	0	0	0	0	0	0	0	0	0
Unclassified	0.000784485	0.000373552	0.000464145	0.000505646	0	6.99154e-05	0.000902712	0.00210446	0.00596083	0.00371287	0.0014771	0.00282353	0.000430849	0	0	0	0	0	0	0	0	0	0	0	0	0	0	0	0.00957533	0.00182905	0.015489	0.00108061	0.00432337	0	0	0	0	0	0
Unclassified	0.000784485	0.0306313	0.0313298	0.0537671	0.0618834	0.184786	0.00549834	0.0162617	0.0147601	0.0313531	0.0196947	0.0348235	0.019819	0.00166389	0	0	0	0	0	0	0	0	0	0	0	0	0	0	0	0	0.000781346	0	0.000435392	0	7.08316e-07	8.41253e-06	1.65094e-06	0	0.0474529
Unclassified	0.000740902	0	0	0	0	0	4.10324e-05	0	0	0	0	0	0	0.00432612	0	0	0	0	0	0	0	0	0	0	0	0	0	0	0.000531186	0.00152911	0	0	0.00137492	0	0	0	0	0	8.72296e-05
Novosphingobium	0.000653737	0.00373552	0	0.000168549	0	0	0	0.000191314	0	0	0	0.000470588	0	0.0046589	1.76982e-05	0	0	0	0	0	0	0	0	0	0	0	0	0	0.000307529	0	0	0	0	0	7.08316e-07	0	0	0	0
Steroidobacter	0.000610155	0	0	0	0	0	0	0	0	0.000412541	0	0	0	0.000998336	0	0	0	0	0	0	0	0	0	0	0	0	0	0	0.000153764	0.000370514	0	0	0	0	0	0	0	0	0.000348918
Unclassified	0.000610155	0.0433321	0.00371316	0.00269678	0.000597907	0.000139831	0.00574453	0.0172183	0.00567698	0.00288779	0.00590842	0.00376471	0.00344679	0.00232945	0	0	0	0	0	0	0	0	0	0	0	0	0	0	0.000643015	0.000117624	0	0	1.52769e-05	0	0	0	0	0	0.000377995
Unclassified	0.000610155	0	0	0	0	6.99154e-05	0	0.000765257	0.000283849	0.000825083	0	0	0.000430849	0	0	0	0	0	0	0	0	0	0	0	0	0	0	0	0.00747854	0.000394039	0.017159	0.000324184	0.00313941	0	0	0	0	0	0.00101768
Unclassified	0.000566572	0	0	0	0	0	0	0.000382629	0	0	0	0	0	0	0	0	0	0	0	0	0	0	0	0	0	0	0	0	9.78501e-05	0	0	0	0	0	0	0	0	0	0
Unclassified	0.00052299	0	0	0	0	0	0	0	0	0	0	0	0	0	0	0	0	0	0	0	0	0	0	0	0	0	0	0	6.98929e-05	0.000223485	0.00162397	0.000972552	7.63846e-06	0	0	0	0	0	0
Massilia	0.000435825	0.000373552	0	0	0	0	4.10324e-05	0	0	0	0	0	0	0	0	0	0	0	0	0	0	0	0	0	0	0	0	0	0	0	0	0	0	0	0	0	0	0	0
Unclassified	0.000435825	0	0	0	0	0	0	0	0	0	0	0	0	0	0	0	0	0	0	0	0	0	0	0	0	0	0	0	1.39786e-05	0	0	0	7.63846e-06	0	0	0	0	0	0
Unclassified	0.000435825	0	0	0	0	0	0	0	0	0	0	0	0	0	0	0	0	0	0	0	0	0	0	0	0	0	0	0	0	0	0.000229808	0	0	0	0	0	0	0	0
Unclassified	0.000392242	0	0	0.000168549	0	0	0	0	0	0	0	0.000470588	0.000430849	0.000332779	0	0	0	0	0	0	0	0	0	0	0	0	0	0	0.000209679	0.00739264	0.000505577	0.000972552	0.000290261	0	0	0	0	0	8.72296e-05
Unclassified	0.000392242	0.00560329	0.00742632	0.000842744	0.00149477	0.000139831	0.00155923	0.0118615	0.0136248	0.0103135	0.00344658	0.00329412	0.00430849	0	0	0	0	0	0	0	0	0	0	0	0	0	0	0	0.0314658	0.00151734	0.000122564	0.00270153	0.00223807	0	0	0	0	6.21048e-07	0.000581531
Chryseobacterium	0.00034866	0	0	0	0	0	0	0	0	0	0	0	0	0	0	0	0	0	0	0	0	0	0	0	0	0	0	0	0	5.88118e-05	0	0	0	0	0	0	0	0	2.90765e-05
Nonomuraea	0.00034866	0	0	0	0	0	0	0.000765257	0	0	0.000492368	0	0	0.000332779	0.000300869	0	0	0	0	0	0	0	0	0	0	0	0	0	0.00171937	0.000417564	0.00147077	0.000108061	1.52769e-05	0	0	0	0	0	0.000145383
Unclassified	0.00034866	0.00112066	0.000464145	0	0	0	4.10324e-05	0.00363497	0.000851547	0	0.000984737	0	0	0	0	0	0	0	0	0	0	0	0	0	0	0	0	0	0.0039839	0.00884529	0.00796666	0.000540307	0.00236028	0	0	0	0	0	0.000319842
Unclassified	0.00034866	0	0	0	0	0	0	0.000191314	0.000567698	0	0	0.000470588	0.000430849	0	0	0	0	0	0	0	0	0	0	0	0	0	0	0	0.000237636	0	0	0	0	0	0	0	0	0	0
Delftia	0.000305077	0.000747105	0.000464145	0.00101129	0.000298954	0.00314619	0.000123097	0.000191314	0.000283849	0	0.000492368	0.000470588	0	0.00399334	3.53964e-05	0.187444	0	0	0	0	0	0	0.0010281	0	0	0	0	0	0	0	0	0	0	0	0	0	0	0	0.00110491
Sphingobium	0.000305077	0	0	0	0	0	0	0	0	0	0	0	0	0	0	0	0	0	0	0	0	0	0	0	0	0	0	0	0	0.000176435	0.000275769	0	0.000114577	0	0	0	0	0	0
Unclassified	0.000305077	0.00149421	0.000464145	0.00219113	0	0	4.10324e-05	0	0.000851547	0	0.000984737	0.000470588	0	0.00432612	0	0	0	0	0	0	0	0	0	0	0	0	0	0	0.00806564	0.00352871	0.00572987	0.00313378	0.00162699	0	0	0	0	0	0.000785066
Unclassified	0.000305077	0.00485618	0.0025528	0.00202259	0.121076	0.000139831	0.000369291	0.000765257	0.00283849	0.00371287	0.00344658	0.00282353	0.00215424	0	0	0	0	0	0	0	0	0	0	0	0	0	0	0	0.000167743	0	0	0	0	0	0	0	0	0	0.000145383
Unclassified	0.000261495	0.00186776	0.000464145	0.000337098	0	0	0.000164129	0.00210446	0.000283849	0.000412541	0.000492368	0.0117647	0.00818613	0	0	0	0	0	0	0	0	0	0.00017135	0	0	0	0	0	0.0046968	0.00719268	0.000811987	0.00108061	0.000511777	0	0	0	0	0	0.00066876
Unclassified	0.000261495	0.010833	0.000232072	0.000842744	0.000597907	0	0	0.00765257	0.000283849	0	0.000492368	0	0	0	0	0	0	0	0	0	0	0	0	0	0	0	0	0	0.00173334	0.000717504	0	0.000972552	0.000679823	0	0	0	0	0	0
Unclassified	0.000261495	0.00149421	0.000696217	0.000168549	0.000597907	0.000279662	0.0027902	0.00459154	0.00141924	0.00783828	0.00393895	0.00376471	0.000861698	0	0	0	0	0	0	0	0	0	0	0.00021106	0	0	0	0	0.000111829	0.000729266	1.53205e-05	0.000648368	0	0	2.12495e-06	0	5.50313e-07	0	0.000116306
Unclassified	0.000261495	0.00224131	0.00185658	0.000337098	0	6.99154e-05	8.20647e-05	0.00248709	0.000851547	0	0.000492368	0.000470588	0	0	0	0	0	0	0	0	0	0	0	0	0	0	0	0	0.000363443	1.76435e-05	0	0	3.05538e-05	0	0	0	0	0	8.72296e-05
Ammoniphilus	0.000217912	0	0	0	0	0	0	0	0	0	0	0	0	0	0	0	0	0	0	0	0	0	0	0	0	0	0	0	0.0100366	0.00319348	0.0370909	0.000108061	0	0	0	0	0	0	0.00319842
Kaistobacter	0.000217912	0.00896526	0.0025528	0.00387662	0.00328849	0.000769069	0.00295433	0.0256361	0.00482543	0.0540429	0.0502216	0.0470588	0.00689358	0	0	0	0	0	0	0	0	0	0	0	0	0	0	0	0.00134194	0	0	0.000108061	0	0	0	0	0	0	0.00107583
Nitrospira	0.000217912	0.00635039	0	0.000168549	0	0	0	0	0.000283849	0.000825083	0	0	0	0	0	0	0	0	0	0	0	0	0	0	0	0	0	0	0.000167743	0	0	0	0	0	0	0	0	0	5.81531e-05
Pirellula	0.000217912	0.00747105	0.00580181	0	0.0038864	0	0.000410324	0.00593074	0.00283849	0.00866337	0.00886263	0.000470588	0.00560103	0	0	0	0	0	0	0	0	0	0	0	0	0	0	0	0	0	0	0.000108061	0	0	0	0	0	0	5.81531e-05
Roseateles	0.000217912	0	0.000232072	0	0	0.000838985	0	0.000191314	0	0	0	0.000470588	0	0	0	0	0	0	0	0	0	0	0	0	0	0	0	0	0	0	0	0	0	0	0	0	0	0	0.000203536
Unclassified	0.000217912	0.00149421	0	0.000168549	0.00209268	0.00195763	0.00123097	0.00325234	0.00141924	0.000412541	0.000492368	0.000941176	0.000430849	0.0146423	0	0.0505872	0	0	0	0	0	0	0	0	0	0	0	0	1.39786e-05	9.40988e-05	0	0	0	0	0	0	0	0	5.81531e-05
Unclassified	0.000217912	0.000373552	0	0	0.000298954	6.99154e-05	0	0.000191314	0	0.00123762	0	0.000470588	0	0	0	0	0	0	0	0	0	0	0	0	0	0	0	0	5.59143e-05	0	0	0	0	0	7.08316e-07	0	0	0	0
Jiangella	0.00017433	0	0	0	0	0	0	0	0	0	0	0	0	0	0	0	0	0	0	0	0	0	0	0	0	0	0	0	9.78501e-05	0	0	0	0	0	0	0	0	0	0
Unclassified	0.00017433	0.00560329	0.00162451	0.00775324	0.0101644	0.000139831	8.20647e-05	0.00248709	0.00170309	0.00165017	0.000492368	0.00141176	0.00517019	0	0	0	0	0	0	0	0	0	0	0	0	0	0	0	5.59143e-05	0.00224073	0.00137885	0.000324184	0.000557607	0	0	0	0	0	8.72296e-05
Unclassified	0.00017433	0	0	0	0	0	0	0	0	0	0	0	0	0	0	0	0	0	0	0	0	0	0	0	0	0	0	0	0.0246303	0.00358752	0.00445827	0.000108061	0	0	0	0	0	0	8.72296e-05
Anaerococcus	0.000130747	0.0112066	0.00301694	0.00286533	0.0038864	0.000489408	0.000369291	0.00325234	0.00567698	0.00577558	0.00689316	0.00705882	0.00560103	0	0	0	0	0	0	0	0	0	0	0	0	0	0	0	0	0	0	0	5.34692e-05	2.97446e-06	2.83326e-06	3.25986e-05	1.65094e-06	9.31572e-06	0.0541405
Cohnella	0.000130747	0.00112066	0.000464145	0	0.00478326	0	4.10324e-05	0.000382629	0.000851547	0.000412541	0	0.000941176	0.000861698	0	1.76982e-05	0	0	0	0	0	0	0	0	0	0	0	0	0	0.000209679	0.000582236	0	0	0.000320815	0	0	0	0	0	0.000465224
Enhydrobacter	0.000130747	0	0.000232072	0	0	0.000489408	0	0	0	0	0	0	0.000430849	0	0	0	0	0	0	0	0	0	0	0	0	0	0	0	0.00290755	0.00119976	0	0.000648368	0	0	0	0	0	0	0.000639684
Finegoldia	0.000130747	0	0	0	0	0	0	0	0	0	0	0.000470588	0	0	0	0	0	0	0	0	0	0	0	0	0	0	0	0	0	0.000152911	0	0	0	7.43615e-07	3.54158e-06	2.10313e-05	1.10063e-06	4.34734e-06	0
Hyphomicrobium	0.000130747	0.000373552	0	0	0	0	0	0	0	0	0	0	0.000861698	0	0	0.000451671	0	0	0	0	0	0	0	0	0	0	0	0	0	7.05741e-05	0	0	7.63846e-06	0	0	0	0	0	0
Lactococcus	0.000130747	0	0	0	0	0	0	0	0	0	0	0	0	0	0	0	0	0	0.000402414	0	0	0	0	0.00021106	0	0	0.000170242	0	0	0	0	0	0	0.0261358	0.000108372	0.000226087	0.000200864	0.019758	0
Pilimelia	0.000130747	0	0	0	0	0	0	0.000573943	0	0	0	0	0	0	0	0	0	0	0	0	0	0	0	0	0	0	0	0	0.000153764	0.000247009	0.000367692	0	0	0	0	0	0	0	0
Sphingomonas	0.000130747	0.000373552	0.00765839	0.000505646	0.000597907	0.000279662	0.000533421	0.00344366	0	0.00825083	0.00689316	0.000470588	0.0124946	0	0	0	0	0	0	0	0	0	0.00017135	0	0	0	0	0	5.59143e-05	1.17624e-05	0.000398333	0	0.000168046	0	5.66653e-06	2.10313e-06	5.50313e-07	0	0.00075599
Unclassified	0.000130747	0.00448263	0	0.000168549	0.000298954	0	0	0.000765257	0.000567698	0.00123762	0.00295421	0	0.000430849	0	0	0	0	0	0	0	0	0	0	0	0	0	0	0	0	0	0	0	0	0	0	0	0	0	0
Unclassified	0.000130747	0	0	0	0	0	0	0	0	0	0	0	0	0	0	0	0	0	0	0	0	0	0	0	0	0	0	0	0	0	0	0	0	0	0	0	0	0	0
Unclassified	0.000130747	0	0	0.000168549	0.000298954	0	4.10324e-05	0	0	0	0	0	0	0.0349418	3.53964e-05	0	0	0	0	0	0	0	0	0	0	0	0	0	1.39786e-05	0.000582236	0	0	0	2.97446e-06	1.69996e-05	1.99798e-05	6.98897e-05	4.28523e-05	8.72296e-05
Unclassified	0.000130747	0	0	0	0	0	0	0	0	0	0	0	0	0	0	0	0.00800949	0.00829827	0.0118712	0.00910643	0.0034778	0.00344432	0.0010281	0.0137189	0.00711522	0.000195963	0.00102145	0.000404285	0	0	0	0	0	0	0	0	5.50313e-07	2.48419e-06	0
Propionibacterium	8.7165e-05	0	0	0	0	0	0	0	0	0	0.000492368	0	0.0017234	0.00532446	0.00107959	0.0158085	0	0	0	0	0	0	0.0003427	0	0.000124828	0	0	0	0	0	0	0	0	0	0	0	0	0	0
Proteus	8.7165e-05	0	0	0	0	0	0	0	0	0	0	0	0	0	0	0	0	0	0	0	0	0	0	0.00021106	0	0	0	0	0	0	0	0	0	7.43615e-07	4.95821e-06	2.10313e-06	2.75156e-06	1.86314e-06	0
Pseudonocardia	8.7165e-05	0	0	0	0.000298954	0	0	0	0.000567698	0	0	0	0	0	0	0	0	0	0	0	0	0	0	0	0	0	0	0	0.00173334	0.000940988	0.00107244	0.000216123	0.000351369	0	0	0	0	6.21048e-07	2.90765e-05
Rubrivivax	8.7165e-05	0	0.000232072	0	0.000896861	0.0009089	4.10324e-05	0	0	0.000412541	0	0	0	0	0	0	0	0	0	0	0	0	0	0	0	0	0	0	0	3.52871e-05	1.53205e-05	0	0	0	0	0	5.50313e-07	4.96839e-06	0.000319842
Stenotrophomonas	8.7165e-05	0	0	0	0	0	0	0	0	0	0	0	0	0.000332779	5.30945e-05	0	0	0	0	0	0	0	0	0	0	0	0	0	5.59143e-05	0	0	0	0.000229154	7.43615e-07	0	0	0	0	0
Unclassified	8.7165e-05	0	0	0	0	0	0	0	0	0	0	0	0	0	0	0	0	0	0	0	0	0	0	0	0	0	0	0	0	0	0	0	0	0	0	0	0	0	0
Unclassified	8.7165e-05	0	0	0	0	0	0	0	0	0	0	0	0	0	0	0	0	0	0	0	0	0	0	0	0	0	0	0	0	0	0	0	0	0	0	0	0	0	0
Unclassified	8.7165e-05	0	0	0	0	0	0	0.000765257	0	0	0	0	0	0	0	0	0	0	0	0	0	0	0	0	0	0	0	0	0.00229249	0.000882177	0.000934551	0.00075643	0.00442267	0	0	0	0	0	0.000348918
Unclassified	8.7165e-05	0	0	0.000337098	0	0	0.000205162	0.0013392	0.00170309	0	0	0	0.000430849	0	0	0	0	0	0	0	0	0	0	0	0	0	0	0	0.0106097	0.124258	0.00163929	0.0700238	0.0410567	0	0	0	0	0	0.000407071
Unclassified	8.7165e-05	0.000747105	0	0.000168549	0	0.000349577	0.000123097	0.0013392	0	0.000825083	0.000984737	0	0	0	0	0	0	0	0	0	0	0	0	0	0	0	0	0	1.39786e-05	0.000176435	0	0.000108061	0	0.00307113	1.41663e-06	0.00165096	5.50313e-07	0.000535965	0.000494301
Unclassified	8.7165e-05	0.00448263	0.000232072	0.000168549	0.000597907	0.000139831	0	0.00153051	0.00170309	0.00453795	0.00738552	0.00423529	0.00344679	0.00133111	0	0	0	0	0	0	0	0	0.0003427	0	0.000124828	0	0	0	0.000209679	0.000552831	0.000444295	0.000108061	1.52769e-05	0	0	0	0	6.21048e-07	2.90765e-05
Bacteroides	4.35825e-05	0.000373552	0.000232072	0.000505646	0.000298954	0.000139831	0	0	0	0.00165017	0	0	0.000430849	0.000332779	0.00272552	0.000451671	0	0	0	0.000379435	0	0.000191351	0.000514051	0.00021106	0	0.000979816	0.000510725	0.000606428	0	0	0	0	0	1.63595e-05	0.0012261	0.00150584	0.0110569	0.00269535	2.90765e-05
Herbidospora	4.35825e-05	0	0	0	0	0	0	0	0.000283849	0.000825083	0	0	0	0	3.53964e-05	0	0	0	0	0	0	0	0	0	0	0	0	0	0	0	0	0	0	0	0	0	0	0	0
Microtetraspora	4.35825e-05	0	0	0	0	0	0	0	0	0	0	0	0	0.000332779	1.76982e-05	0	0	0	0	0	0	0	0	0	0	0	0	0	0	0	0	0	0	0	0	0	0	0	0
Saccharopolyspora	4.35825e-05	0	0	0	0	0	0	0	0.000567698	0	0	0	0	0	0	0	0	0	0	0	0	0	0	0	0	0	0	0	0.000111829	5.29306e-05	7.66025e-05	0	0.000175685	0	0	0	0	0	0.000116306
Saccharothrix	4.35825e-05	0	0	0	0	0	0	0	0	0	0	0	0	0.00299501	0	0	0	0	0	0	0	0	0	0	0	0	0	0	9.78501e-05	0	0	0	3.05538e-05	0	0	0	0	0	0
Shimazuella	4.35825e-05	0	0.000232072	0	0	0	0	0.0013392	0.0011354	0	0	0	0.000430849	0	0	0	0	0	0	0	0	0	0	0	0	0	0	0	6.98929e-05	5.88118e-06	0.00125628	0	0	0	0	0	0	0	2.90765e-05
Sporanaerobacter	4.35825e-05	0	0	0	0	6.99154e-05	0	0.000191314	0	0	0.000492368	0.000470588	0	0	0.000637134	0	0	0	0	0	0	0	0	0	0	0	0	0	0	0	0	0	0	0	0	0	0	0	0
Staphylococcus	4.35825e-05	0.00410908	0.00533767	0.00168549	0.00149477	6.99154e-05	0.000164129	0.000765257	0.00312234	0.00412541	0.00344658	0.00188235	0.00301594	0	0.000212378	0.00542005	0.000444972	0.000116877	0.000603622	0	0	0	0.122001	0	0.0153539	0.000195963	0.000170242	0	0	0.00225837	0.000566859	0.000648368	0.00194017	4.16424e-05	4.2499e-06	4.20627e-06	9.13519e-05	3.10524e-06	0.0596941
Unclassified	4.35825e-05	0.00410908	0.00208865	0.0175291	0.00239163	0.000209746	0.001272	0.00841783	0.00993471	0.00783828	0.00590842	0.00988235	0.0017234	0.000332779	0	0	0	0	0	0	0	0	0	0	0	0	0	0	0	0	0	0	0	0	0	0	0	0	2.90765e-05
Unclassified	4.35825e-05	0.0298842	0.00301694	0.00151694	0.00269058	0.000279662	0.00176439	0.0181749	0.018734	0.00577558	0.00689316	0.0127059	0.00560103	0	0	0	0	0	0	0	0	0	0	0	0	0	0	0	0.000251615	2.94059e-05	0.000229808	0	5.34692e-05	0	0	0	0	0	0.000203536
Unclassified	4.35825e-05	0.00112066	0.00116036	0	0	0	0	0.000191314	0	0	0	0	0	0	0	0	0	0	0	0	0	0	0	0	0	0	0	0	0	0	0	0	0	0	0	0	0	0	0
Unclassified	4.35825e-05	0	0	0	0	0	0	0	0	0	0	0	0	0	0	0	0	0	0	0	0	0	0	0	0	0	0	0	0	2.94059e-05	0	0.000108061	0.000152769	0	0	0	0	0	0
Unclassified	4.35825e-05	0	0	0	0	6.99154e-05	0	0	0	0	0	0	0	0	1.76982e-05	0.0560072	0	0	0	0	0	0	0	0	0	0	0	0	0	0	0	0	0	7.43615e-07	0	0	0	0	0
Unclassified	4.35825e-05	0	0	0	0	0	0	0	0	0	0	0	0	0	0	0	0	0	0	0	0	0	0	0	0	0	0	0	0	8.23365e-05	0	0.0028096	1.52769e-05	0	7.08316e-07	0.000149322	2.75156e-06	1.86314e-06	0
Unclassified	4.35825e-05	0	0	0	0	0	0	0	0	0	0	0	0	0	0	0	0	0	0	0	0	0	0	0	0	0	0	0	1.39786e-05	0	0.00029109	0	0	0.0039776	0.00842117	0.00106629	0.0101368	0.00160603	0
Unclassified	4.35825e-05	0	0	0	0	0.000279662	0	0	0	0	0	0	0.000430849	0	0	0	0	0	0	0	0	0	0	0	0	0	0	0	2.79572e-05	0	0.000260449	0	0.0001986	0	0	0	0	0	0
Unclassified	4.35825e-05	0.00896526	0.00533767	0.00505646	0.00298954	0.0018178	0.00102581	0.00765257	0.00283849	0.0070132	0.00443131	0.00941176	0.00603188	0	0	0	0	0	0	0	0	0	0.000856751	0	0	0	0	0	0	0.00160556	3.0641e-05	0	0.00895227	0	0	0	0	0	0.0294545
Unclassified	4.35825e-05	0.0145685	0.00324901	0.00117984	0.000896861	0.000349577	0.000246194	0.0093744	0.0107863	0.0049505	0.00689316	0.00658824	0.0116329	0	0	0	0	0	0	0	0	0	0	0	0	0	0	0	0.00150969	0.000546949	0.000413654	0.00637562	0.000465946	0	0	0	0	0	0.000319842
__1-68	0	0	0	0	0	0	0	0	0	0	0	0	0	0	0	0	0	0	0	0	0	0	0	0	0	0	0	0	0	0	0	0.000108061	0	0	0	0	0	0	0
02d06	0	0	0	0	0	0	0	0	0	0	0	0	0	0	0	0	0	0	0	0	0	0	0	0	0	0	0	0	0	0	0	0	0	2.30521e-05	2.83326e-05	9.14863e-05	2.6415e-05	0.000212398	0
5-7N15	0	0.000373552	0.0211186	0.000337098	0	0	4.10324e-05	0.000573943	0	0.00206271	0.00196947	0.000470588	0	0	0	0	0	0	0	0	0	0	0	0	0	0	0	0.000202143	0	0	0	0	0	0	0	0	5.50313e-07	0	0
Abiotrophia	0	0	0	0	0	0	0	0	0	0	0	0	0	0	0	0	0	0.000233754	0.000402414	0	0	0.00153081	0	0.000633179	0	0	0	0.000606428	0	0	0	0	0	0	0	0	0	0	0
Acaricomes	0	0	0.000464145	0	0	0	0	0	0	0	0	0	0	0	0	0	0	0	0	0	0	0	0	0	0	0	0	0	0	0	0	0	0	0	0	0	0	0	5.81531e-05
Achromobacter	0	0	0	0	0	0	0	0	0	0	0	0	0	0	0	0	0	0	0	0	0	0	0	0	0	0	0	0	0	0	0.000214487	0	0	0	0	0	0	0	0
Acidaminococcus	0	0	0	0	0.000298954	0	0	0	0	0	0	0	0	0	0	0	0	0	0	0	0	0	0	0	0	0	0	0	0	0	0	0	0	0.000948853	0	0	0	0	0
Acidovorax	0	0	0	0.000168549	0	6.99154e-05	0.000369291	0	0	0	0	0.000470588	0	0	0	0	0	0	0	0	0	0	0.00017135	0	0.000374485	0	0	0	1.39786e-05	0	0	0	0	0	0	0	0	0	0.000639684
Acrocarpospora	0	0	0	0	0	0	0	0	0	0	0	0	0	0.000332779	3.53964e-05	0	0	0	0	0	0	0	0	0	0	0	0	0	0	0	0	0	0	0	0	0	0	0	0
Actinoalloteichus	0	0	0	0	0	0	0	0	0	0	0	0	0	0	0	0	0	0	0	0	0	0	0	0	0	0	0	0	1.39786e-05	0	0	0	0	0	0	0	0	0	0
Actinobacillus	0	0	0	0	0	0	0	0	0	0	0	0	0	0	0	0	0	0.000467508	0.0160966	0.00132802	0	0.00229621	0	0.00021106	0.0383223	0.00509504	0.00357508	0.0244593	0	0	0	0	0	1.48723e-05	7.08316e-07	1.15672e-05	3.30188e-06	1.2421e-06	0
Actinokineospora	0	0	0	0	0	0	0	0	0	0	0	0	0	0	0	0	0	0	0	0	0	0	0	0	0	0	0	0	0.00310325	0.00159968	0.000720064	0.00075643	0.00234501	0	0	0	0	0	0
Actinomadura	0	0	0	0	0	0	0	0	0	0	0	0	0	0	0	0	0	0	0	0	0	0	0	0	0	0	0	0	0.000461293	0.00202901	0.0053775	0.00129674	0.000557607	0	0	0	0	0	0.000174459
Actinomyces	0	0	0	0	0	0	4.10324e-05	0	0.000283849	0	0	0	0	0	0	0	0.0358944	0.189458	0.108652	0.0339594	0.00802568	0.0149254	0.0762509	0.0263824	0.017476	0.00803449	0.00902281	0.0147564	0	0	0	0	0.000122215	0.000571096	0.000107664	7.99191e-05	5.00785e-05	5.65154e-05	0
Actinomycetospora	0	0	0	0	0	0	0	0	0	0	0	0	0	0	0	0	0	0	0	0	0	0	0	0	0	0	0	0	0.000307529	0	0	0	0	0	7.08316e-07	0	0	0	0
Actinoplanes	0	0.00298842	0.000232072	0.000505646	0.00179372	0	4.10324e-05	0.00306103	0.000567698	0	0.00344658	0.00470588	0	0	0	0	0	0	0	0	0	0	0	0	0	0	0	0	0	0	0	0	0	0	0	0	0	0	0
Actinopolyspora	0	0	0	0	0	0	0	0	0	0	0	0	0	0	0	0	0	0	0	0.000189717	0	0	0	0	0	0	0	0	0	0	0	0	0	0	0	0	0	0	0
Adhaeribacter	0	0	0	0.000168549	0	0	0	0	0	0.000412541	0	0	0	0	0	0	0	0	0	0	0	0	0	0	0	0	0	0	0	0	0	0	0	0	0	0	0	0	0
Adlercreutzia	0	0	0	0	0	0	0	0	0	0	0	0	0	0	0	0	0	0	0	0	0	0	0	0	0	0	0	0	0	0	0	0	0	0	7.08316e-07	0	5.50313e-07	0	0
Aerococcus	0	0	0	0	0	0	0	0	0	0	0	0	0	0	0	0	0	0	0	0	0	0	0	0	0	0	0	0	0	0	0	0	0	0	0	0	1.10063e-06	1.86314e-06	8.72296e-05
Aeromicrobium	0	0	0	0	0	0	0	0	0	0	0	0	0	0	0	0	0	0	0	0	0	0	0	0	0	0	0	0	0.00264195	2.94059e-05	0	0.000108061	0	0	0	0	0	0	8.72296e-05
Afifella	0	0.010833	0.000232072	0.000337098	0	0.000279662	0.000123097	0.00248709	0.000851547	0.00330033	0.00393895	0	0	0	0	0	0	0	0	0	0	0	0	0	0	0	0	0	5.59143e-05	0.000123505	0	0.000216123	0	0	0	0	0	0	0.000116306
Aggregatibacter	0	0	0	0	0	0	0	0	0	0	0.0014771	0	0	0	0	0	0.00637793	0.000116877	0.00261569	0.00132802	0.000267523	0.093762	0	0.0124525	0.00399451	0.00137174	0.0020429	0.00545785	0	0	0	0	0	1.18978e-05	0	5.25783e-06	3.85219e-06	7.45258e-06	0
Agrobacterium	0	0.00224131	0	0	0	0	4.10324e-05	0.000573943	0	0.000412541	0.00393895	0	0	0	0	0	0	0	0	0	0	0	0	0	0	0	0	0	0	1.76435e-05	0.00128692	0	0	0	0	1.05157e-06	5.50313e-07	0	2.90765e-05
Agromyces	0	0	0	0.000168549	0	0	0	0	0	0.000825083	0	0	0	0	0	0	0	0	0	0	0	0	0	0	0	0	0	0	5.59143e-05	0	0	0	0	0	0	0	0	0	0.000174459
Akkermansia	0	0	0	0	0	0	0	0	0	0	0	0	0	0	0	0	0	0	0	0	0	0	0	0	0	0	0	0	0	0	0	0	0	0	1.27497e-05	0.000112518	1.65094e-06	4.59576e-05	0
Alcaligenes	0	0	0	0	0	0	0	0	0	0	0	0	0	0	0	0.000451671	0	0	0	0	0	0	0	0	0	0	0	0	0	0	0	0	0	0	0	0	0	0	0
Alcanivorax	0	0.000747105	0.00092829	0.000337098	0.000896861	0.000279662	8.20647e-05	0.00114789	0	0.000412541	0.000984737	0.00188235	0.0163723	0	0	0	0	0	0	0	0	0	0	0	0	0	0	0	0	0	0	0	0	0	0	0	0	6.21048e-07	2.90765e-05
Alicycliphilus	0	0	0	0	0	0	0	0	0	0	0	0	0	0	0	0	0	0	0	0	0	0	0.000685401	0	0	0	0	0	0	5.88118e-06	1.53205e-05	0	0	0	0	0	0	4.34734e-06	0
Alicyclobacillus	0	0	0	0	0	0	0	0.000382629	0	0	0	0	0	0	0	0	0	0	0	0	0	0	0	0	0	0	0	0	0	0.00192903	0.00153205	0	0	0	0	0	0	0	0.222581
Alkalibacter	0	0	0	0	0	0	0	0	0	0	0	0	0	0	0	0	0	0	0	0	0	0	0	0	0	0	0	0	0	0	0	0	0	0	0	0	1.10063e-06	0	0
Allobaculum	0	0	0	0	0	0	4.10324e-05	0	0	0	0	0	0	0	0	0	0	0	0	0	0	0	0	0	0	0	0	0	0	0	0	0	0	0	0	0	5.50313e-07	0	0
Alloiococcus	0	0	0	0	0	0	0	0	0	0	0	0	0	0	0	0	0	0	0	0	0	0	0	0	0	0	0	0	0	0	0	0	0	0	0	0	0	6.21048e-07	0
Alloscardovia	0	0	0	0	0	0	0	0	0	0	0	0	0	0	0	0	0	0	0	0	0	0	0	0	0	0	0	0	0	0	0	0	0	7.43615e-07	0	0	0	0	0
Amphritea	0	0	0	0	0	0	0	0	0	0	0	0	0	0	0	0	0	0	0	0	0	0	0	0	0	0	0	0	0	0	0	0	0	7.43615e-07	0	0	0	0	0
Amycolatopsis	0	0	0	0	0	0	0	0	0	0	0	0	0	0	0	0	0	0	0	0	0	0	0	0	0	0	0	0	1.39786e-05	5.88118e-06	0	0	0	0	0	0	0	0	0
Amycolatopsis	0	0	0	0	0	0	0	0	0	0	0	0.000470588	0	0	0	0	0	0	0	0	0	0	0	0	0	0	0	0	0	0.000235247	1.53205e-05	0	0.00211585	0	0	0	0	0	2.90765e-05
Amycolatopsis	0	0	0	0	0	0	0	0	0	0	0	0	0	0	0	0	0	0	0	0	0	0	0	0	0	0	0	0	1.39786e-05	0	0	0	0	0	0	0	0	0	0
Anaerobacillus	0	0	0	0	0	0	0	0	0	0	0.000492368	0	0	0	0	0	0	0	0	0	0	0	0	0	0	0	0	0	1.39786e-05	0.000111742	0	0	0	2.23084e-06	3.54158e-06	0	0	4.03681e-05	0.000261689
Anaerofustis	0	0	0	0	0	0	0	0	0	0	0	0	0	0	0	0	0	0	0	0.000189717	0	0	0	0	0	0	0	0	0	0	0	0	0	7.43615e-07	7.08316e-07	7.36097e-06	1.10063e-06	4.96839e-06	0
Anaerostipes	0	0	0	0	0	0	0	0	0	0	0	0	0	0	0	0	0	0	0	0	0	0	0	0	0	0	0	0	0	0	0	0	0	3.27191e-05	0.000643151	0.000143013	0.000130974	6.76943e-05	0
Anaerotruncus	0	0	0	0	0	0	0	0	0	0	0	0	0	0	0	0	0	0	0	0	0	0	0	0	0	0	0	0	0	0	0	0	0	0	0	0	5.50313e-07	2.48419e-06	0
Anaerovibrio	0	0	0	0	0	0	0	0	0	0	0	0	0	0	0	0	0.000296648	0	0	0.000189717	0	0.000191351	0	0	0	0	0.000170242	0	0	0	0	0	0	7.43615e-07	0.00694221	0.00181395	2.14622e-05	3.16735e-05	0
Anaerovorax	0	0	0	0	0	0	0	0	0	0	0	0	0	0	0	0	0	0	0	0	0	0	0	0	0.000499313	0.00156771	0	0.00384071	0	0	0	0	0	0	0	1.47219e-05	0	0	0
Aneurinibacillus	0	0	0	0	0	0	0	0	0	0	0	0	0	0	0	0	0	0	0	0	0	0	0	0	0	0	0	0	0	0	0	0	0	0	7.08316e-07	0	0	0	0
Anoxybacillus	0	0.000747105	0.000464145	0.000337098	0	0	0	0.000191314	0.000567698	0.000825083	0.000492368	0	0.00215424	0	0	0	0	0	0	0	0	0	0	0	0	0	0	0	0.000223657	2.94059e-05	9.1923e-05	0	2.29154e-05	0	0	0	0	0	8.72296e-05
Aquamonas	0	0	0	0	0	0	0	0	0	0	0	0	0	0	0	0	0	0	0	0	0	0	0	0	0	0	0	0	0	0	0	0	0	1.48723e-06	0	0	0	6.21048e-06	0
Aquicella	0	0	0	0	0	0	0	0	0.000283849	0.000412541	0	0	0	0	0	0	0	0	0	0	0	0	0	0	0	0	0	0	0	1.76435e-05	0	0	0	0	0	0	0	0	0
Aquincola	0	0	0	0	0	0	0	0	0	0	0	0	0	0	0	0	0	0	0	0	0	0	0	0	0	0	0	0	0.000307529	0	4.59615e-05	0	1.52769e-05	0	0	1.05157e-06	0	7.45258e-06	0.000203536
Aquitalea	0	0	0	0	0	0	0	0	0	0	0	0	0	0	0	0	0	0	0	0	0	0	0	0	0	0	0	0	0	0	0	0	0	0	0	0	5.50313e-07	6.21048e-07	0
Arcobacter	0	0	0	0.000168549	0.000298954	0	0	0	0	0	0	0	0	0	0	0	0	0	0	0	0	0	0	0	0	0	0	0	0	0	0	0	0	0	0	0	0	0	0
Arthrobacter	0	0	0.000464145	0.000505646	0	0	4.10324e-05	0	0.000283849	0	0	0	0	0	0	0	0	0.000233754	0.000804829	0	0	0	0	0	0	0	0	0	0.00166345	0	0.000352372	0	0	0	0	0	0	0	0.000261689
Aspromonas	0	0	0	0	0	0	0	0	0	0	0	0	0	0	0	0	0	0	0	0	0	0	0	0	0	0	0.000170242	0	0	0	0	0	0	0	0	0	0	0	0
Atopobium	0	0	0	0	0	0	0	0	0	0	0	0	0	0	0	0	0.000148324	0.000116877	0.000201207	0.000189717	0.000267523	0	0	0	0.000124828	0.00215559	0.0177051	0.00202143	0	0	0	0	0	1.11542e-05	1.41663e-06	2.62892e-05	8.25469e-06	2.48419e-06	0
Aurantimonas	0	0	0.000232072	0	0	0	0	0.000191314	0.000283849	0	0.0014771	0	0	0	0	0	0	0	0	0	0	0	0	0	0	0	0	0	0	0	0	0	0	0	0	0	0	0	0
Azoarcus	0	0	0	0	0	0	0	0	0	0	0	0	0	0	0	0	0	0	0	0	0	0	0	0	0	0	0	0	0	0	0	0	0	0	0	0	5.50313e-07	6.21048e-07	0
Azorhizobium	0	0	0	0	0	0	0	0	0	0	0	0	0	0	0	0	0	0	0	0	0	0	0	0	0	0	0	0	0	0	0.00196102	0	0	0	0	0	0	0	0
Azospira	0	0	0.000464145	0	0	0	4.10324e-05	0	0	0	0	0	0	0	0	0	0	0	0	0	0	0	0	0	0	0	0	0	0	0	1.53205e-05	0	0	0	0	0	0	0	0
Azovibrio	0	0	0	0	0	0	0	0	0	0	0	0	0	0	0	0	0	0	0	0	0	0	0	0	0	0	0	0	0	0	0	0	0	0	0	0	5.50313e-07	0	0
Balneimonas	0	0	0	0	0	0	0	0	0	0	0	0	0	0	0	0	0	0	0	0	0	0	0	0	0	0	0	0	0.0001957	0	0	0	0	0	0	0	0	6.21048e-07	0
BD2-6	0	0	0	0	0	0	0	0	0	0	0	0	0	0	0	0	0	0	0	0	0	0.000191351	0	0	0	0	0	0	0	0	0	0	0	0	0	0	0	0	0
Bdellovibrio	0	0	0	0	0	0	0	0	0	0	0	0	0	0	0	0	0	0	0	0	0	0	0	0.00021106	0	0	0	0	0	0	0	0	0	0	0	0	0	0	0
Beijerinckia	0	0	0	0	0	0	0	0	0	0	0	0	0	0	0	0	0	0	0	0	0	0	0	0	0	0	0	0	0	0	0	0	0	7.43615e-07	0	0	0	0	0
Bifidobacterium	0	0.000373552	0.000232072	0	0.000896861	0	0	0	0.000283849	0.000412541	0	0.000470588	0	0	0	0	0	0	0	0	0	0	0	0	0	0	0	0	0	0	0	0	9.16615e-05	0.00870699	0.00410965	0.000264995	0.00621468	0.0498888	0
Bilophila	0	0	0	0	0	0	0	0	0	0	0	0	0	0	0	0	0	0	0	0	0	0	0	0	0	0	0	0	0	0	0	0	0	2.97446e-05	1.27497e-05	0.000282871	0.000218474	0.000394366	0
Blastochloris	0	0	0	0	0	0.000139831	0.000369291	0	0	0	0	0	0.000430849	0	0	0	0	0	0	0	0	0	0	0	0	0	0	0	0	0	0	0	0	0	0	0	0	0	0
Blastococcus	0	0	0	0	0	0	0	0	0	0	0	0	0	0	0	0	0	0	0	0	0	0	0	0	0	0	0	0	2.79572e-05	0	0	0	0	0	0	0	0	0	0
Blastomonas	0	0	0	0	0	0	0	0	0	0	0	0	0	0	0	0	0	0	0	0	0	0	0	0	0	0	0	0	0	0	0.000383013	0	0	0	0	0	0	0	0
Blautia	0	0.00112066	0.00301694	0.000168549	0.000298954	6.99154e-05	4.10324e-05	0.000382629	0.000283849	0.000412541	0.000492368	0.000941176	0.000430849	0	0.000123887	0	0	0	0	0	0	0	0	0	0	0	0.000170242	0	0	0	0	0	0	0.0166726	0.029711	0.0275952	0.0423917	0.0299047	8.72296e-05
Bosea	0	0	0.000232072	0	0	0.000209746	0	0	0	0	0	0	0	0	0	0	0	0	0	0	0	0	0	0	0	0	0	0	0	0	0	0	0	0	0	0	0	0	0
Brachybacterium	0	0	0	0.000842744	0	0	0	0	0	0	0.000492368	0	0	0	0	0	0	0	0	0	0	0	0	0	0	0	0	0	0	0	0	0	0	0	0	0	0	0	8.72296e-05
Bradyrhizobium	0	0	0.000232072	0	0.000298954	0.000629239	0	0	0	0.000825083	0	0.000941176	0	0	0	0	0	0	0	0	0	0	0	0	0	0	0	0	4.19358e-05	0.000782197	0	0	0	0	0	0	0	0	0.000610607
Brevibacterium	0	0	0	0	0	0	0	0	0	0	0	0	0	0	0	0	0	0.000116877	0	0	0	0	0	0	0	0	0	0	0	0	0	0	4.58307e-05	0	0	0	0	0	0
Brevundimonas	0	0.0104595	0.0041773	0.00235968	0.00508221	0.061176	0.000738583	0.00573943	0.00340619	0.00866337	0.00787789	0.00752941	0.00560103	0	0	0	0	0	0	0	0	0	0	0	0	0	0	0	0	0	0	0	0	0	0	0	0	0	0.000552454
Brochothrix	0	0	0	0	0	0	0	0	0	0	0	0	0	0	0	0	0	0	0	0	0	0	0	0	0	0	0	0	1.39786e-05	0	0	0	0	4.46169e-06	3.54158e-06	0	0	9.93677e-05	0
Bulleidia	0	0	0	0	0	0	0	0	0	0	0	0	0	0	0	0	0	0	0	0	0	0	0	0	0.000249657	0.000195963	0	0.000202143	0	0	0	0	0	0.00084549	0.00310667	0.00329351	0.000824369	0.00282515	0
Burkholderia	0	0	0	0	0	0	0	0	0	0	0	0	0	0	0	0.000903342	0	0	0	0	0	0	0	0	0	0	0	0	0.000587101	0.00565181	0.00643461	0.000864491	0.00249014	1.48723e-06	7.08316e-07	2.10313e-06	2.20125e-06	8.07363e-06	0
Butyricicoccus	0	0	0	0	0	0	0	0	0	0	0	0	0	0	0	0	0	0	0	0	0	0	0	0	0	0	0	0	0	0	0	0	0	1.26415e-05	0	0	0	6.21048e-07	0
Butyricimonas	0	0	0	0.000168549	0	0	0	0	0	0	0	0	0	0	0	0	0	0	0	0	0	0	0	0	0	0	0	0	0	0	0	0	0	0	7.08316e-07	0.000375409	3.41194e-05	0.000776931	0
Butyrivibrio	0	0	0	0	0	0	0	0	0	0	0	0	0	0	0	0	0	0	0	0	0.000535045	0	0	0.00021106	0.000374485	0	0.000510725	0	0	0	0	0	0	3.19754e-05	3.89574e-05	0.000818119	5.61319e-05	0.00222894	0
Caldicoprobacter	0	0	0	0	0	0	0	0	0	0	0	0	0	0	0	0	0	0	0	0.000758869	0	0	0	0.00021106	0	0.000391926	0.000680967	0.000202143	0	0	0	0	0	0	0	0	0	1.86314e-06	0
Caloramator	0	0	0	0	0	0	0	0	0	0	0	0	0	0	0	0	0	0	0	0	0	0	0	0	0	0	0	0	0	0	0	0	0	0	0	2.10313e-06	1.10063e-06	6.21048e-07	0
Campylobacter	0	0	0	0	0	0	0	0	0	0	0	0	0	0	0	0	0.0209137	0.00245442	0.00301811	0.000379435	0	0.00382702	0.0214188	0	0.00199725	0.00333137	0.0403473	0.00626642	0	0	0	0	0	4.16424e-05	1.77079e-05	3.25986e-05	9.35532e-06	4.96839e-06	0
Candidatus Accumulibacter	0	0	0	0	0	0	0	0	0	0	0	0	0	0	0	0	0	0	0	0	0	0	0	0	0	0	0	0	0	0	0	0	0	7.43615e-07	0	0	0	0	0
Candidatus Arthromitus	0	0	0	0	0	0	0	0	0	0	0	0	0	0	0	0	0	0	0	0	0	0	0	0	0	0	0	0	0	0	0	0	0	0	1.41663e-06	0	0	0	0
Candidatus Azobacteroides	0	0	0	0	0	0	0	0	0	0	0	0	0	0	0	0	0	0	0	0	0	0	0	0	0	0	0	0	0	0	0	0	0	7.43615e-07	0	0	0	6.21048e-07	0
Candidatus Entotheonella	0	0	0	0	0	0	0	0	0	0	0	0	0	0	0	0	0	0	0	0	0	0	0	0	0	0	0	0	0.000111829	0.000558712	0.0066491	0	0	0	0	0	0	0	0
Candidatus Koribacter	0	0.0474412	0.00324901	0.0133154	0.0044843	0.000978816	0.00599073	0.0851349	0.0346296	0.0325908	0.0221566	0.00941176	0.0236967	0	0	0	0	0	0	0	0	0	0	0	0	0	0	0	0	0	0	0	0	0	0	0	0	0	0.000145383
Candidatus Nitrososphaera	0	0.000373552	0.00092829	0.000168549	0	0	0	0.00497417	0.00170309	0	0.000984737	0.000470588	0	0	0	0	0	0	0	0	0	0	0	0	0	0	0	0	0.0127904	0.00853359	0.00459615	0.00734817	0.00574412	0	0	0	0	0	0.000261689
Candidatus Portiera	0	0	0	0	0	0	0	0	0	0	0	0	0	0	0	0	0	0	0	0	0	0	0	0	0	0	0	0	0	0	0	0	0	0	0	0	1.10063e-06	1.2421e-06	0
Candidatus Solibacter	0	0.00112066	0.000232072	0	0	0	0	0.000956572	0	0	0	0	0.000430849	0	0	0	0	0	0	0	0	0	0	0	0	0	0	0	9.78501e-05	0	0	0.000108061	0	0	0	0	0	0	8.72296e-05
Candidatus Xiphinematobacter	0	0	0	0.000168549	0	0	0	0	0	0	0	0	0	0.0282862	0	0	0	0	0	0	0	0	0	0	0	0	0	0	6.98929e-05	0	0	0	0.000137492	0	0	0	0	0	2.90765e-05
Capnocytophaga	0	0	0	0	0	0	0	0	0	0	0	0	0	0	0	0	0.144764	0.0119215	0.0354125	0.151584	0.0211343	0.0786452	0.00908156	0.0346138	0.013107	0.00646678	0.0040858	0.0121286	0	0	0	0	0	0	0	0	0	0	0
Cardiobacterium	0	0	0	0	0	0	0	0	0	0	0	0	0	0	0	0	0.010531	0	0.00181087	0	0	0.000191351	0	0	0.000124828	0	0	0	0	0	0	0	0	0	0	0	0	6.21048e-07	0
Carnobacterium	0	0	0	0	0	0	0	0	0	0	0	0	0	0	0	0	0	0	0	0	0	0	0	0	0	0	0	0	0	0	0	0	0	0	7.08316e-07	0	0	3.10524e-06	0
Catellatospora	0	0.000373552	0	0.000168549	0	0	0	0.00153051	0.000283849	0.000412541	0	0	0.000430849	0	0	0	0	0	0	0	0	0	0	0	0	0	0	0	0	0.000846889	0	0	0	0	0	0	0	0	5.81531e-05
Catenibacterium	0	0	0	0	0	0	0	0	0	0	0	0	0	0	0	0	0	0	0	0	0	0	0	0	0	0	0	0	0	0	0	0	0	0.00519043	0.0368197	0.00853346	0.00561814	0.00023103	0
Catonella	0	0	0	0	0	0	0	0	0	0	0	0	0	0	0	0	0.00103827	0.000116877	0	0.0011383	0.00214018	0.000191351	0.00119945	0.00654285	0.000249657	0.00156771	0.000851209	0.00545785	0	0	0	0	0	0	0	0	0	0	0
cc_115	0	0	0	0	0	0	0	0	0	0	0	0	0	0	0	0	0	0	0	0	0	0	0	0	0	0	0	0	0	0	0	0	0	0	0	0	1.10063e-06	0	0
Cellulomonas	0	0.000747105	0.000232072	0.000337098	0	0	4.10324e-05	0	0	0.000412541	0.000984737	0.00564706	0.000430849	0	0	0	0	0	0	0	0	0	0	0	0	0	0	0	0	0	0	0	0	0	0	0	0	0	0.000145383
Cellulosimicrobium	0	0	0.000232072	0.000168549	0	0	0	0.000191314	0	0	0	0	0	0	0	0	0	0	0	0	0	0	0	0	0	0	0	0	0	0	0	0	0	0	0	0	0	0	0
Cellvibrio	0	0	0	0	0	0	0	0	0	0	0	0	0	0	0	0	0	0	0	0	0	0	0	0	0	0	0	0	0	0	0	0	0	0	0	0	0	6.21048e-07	0
Cetobacterium	0	0	0.000232072	0.000168549	0.000597907	6.99154e-05	4.10324e-05	0	0	0.000825083	0	0	0.000430849	0	0	0	0	0	0	0	0	0	0	0.00021106	0	0	0	0	0	0	0	0	0	0	0	3.1547e-06	0.000206918	0	5.81531e-05
CF231	0	0.000747105	0.016013	0	0	0	0	0.000191314	0	0	0	0	0.000430849	0	0	0	0	0	0	0	0	0	0	0	0	0	0	0	0	0	0	0	0	0	7.08316e-06	0.0107134	4.4025e-06	1.86314e-06	0
Chelatococcus	0	0	0	0	0	0	0	0	0	0	0	0	0	0	0	0	0	0	0	0	0	0	0	0	0	0	0	0	0	0.000205841	3.0641e-05	0	0	0	0	0	0	0	0
Chitinophaga	0	0	0	0	0	0	0	0	0	0	0	0	0	0	0	0	0	0	0.000201207	0	0	0	0	0	0	0	0	0	0	0	0	0	0	0	0	0	0	0	0
Chondromyces	0	0.00112066	0	0	0	0	0	0.000191314	0.000283849	0	0	0	0	0	0	0	0	0	0	0	0	0	0	0	0	0	0	0	0	0	0	0	0	0	0	0	0	0	0
Christensenella	0	0	0	0	0	0	0	0	0	0	0	0	0	0	0	0	0	0	0	0	0	0	0	0	0	0	0	0	0	0	0	0	0	1.48723e-06	0	2.10313e-06	0	5.58943e-06	0
Chromobacterium	0	0	0	0	0	0	0	0	0	0	0	0	0	0	0	0	0	0	0	0	0	0	0	0	0	0	0	0	0	0	0	0	0	0	0	0	1.10063e-06	6.21048e-07	0
Chroococcidiopsis	0	0	0	0	0	0	0	0	0	0	0	0	0	0	0	0	0	0	0	0	0	0	0	0	0	0	0	0	0	0	0	0	0	0	0	0	0	6.21048e-07	0
Chryseomicrobium	0	0.000747105	0	0.00438227	0	0	0	0	0.000283849	0	0.000492368	0	0.000861698	0	0	0	0	0	0	0	0	0	0	0	0	0	0	0	0	0	0	0	0	0	0	0	0	0	2.90765e-05
Citrobacter	0	0	0	0	0	0	0	0	0	0	0	0	0	0	0	0	0	0	0	0	0	0	0	0	0	0	0	0	0	0	0	0	0	5.94892e-06	2.12495e-06	5.25783e-06	6.65879e-05	1.86314e-06	0
Cloacibacterium	0	0.000373552	0	0	0	0	0	0.000382629	0	0	0	0	0	0	0	0	0	0.000350631	0	0	0	0	0.00257025	0.00021106	0	0	0	0	0.00142582	0.00222308	0.00871737	0.000216123	0.00286442	0	0	0	0	0	0.0294545
Clostridium	0	0.000373552	0.00092829	0	0	0	0	0	0.000283849	0	0	0	0	0	0	0	0	0	0	0	0	0	0	0	0	0	0	0	0	0	0	0	0	0	0	0	5.50313e-07	0	0
Clostridium	0	0.00149421	0.00162451	0.000337098	0	6.99154e-05	4.10324e-05	0	0	0.000825083	0.000984737	0.00564706	0.00129255	0	0	0	0	0	0	0	0	0	0.00017135	0.00021106	0	0.000195963	0	0	0	3.52871e-05	6.1282e-05	0	0	0.0525163	0.0682555	0.0327363	0.00389236	0.0358457	2.90765e-05
Clostridium	0	0	0	0	0	0	0	0	0	0	0	0	0	0	0	0	0	0	0	0	0	0	0	0	0	0	0	0	0	0	0	0	0	7.43615e-06	1.62913e-05	2.4186e-05	1.10063e-05	0	0
Clostridium	0	0	0	0	0	0	0	0	0	0	0	0	0	0	0	0	0	0	0	0	0	0	0	0	0	0	0	0	0	0	0	0	0	0	0	0	2.75156e-06	0	0
Clostridium	0	0	0	0	0	0	0	0	0	0	0	0	0	0	0	0	0	0	0	0	0	0	0	0	0	0	0	0	0	0	0	0	0	1.48723e-06	1.41663e-06	1.05157e-06	5.50313e-07	6.21048e-07	0
Collimonas	0	0	0	0	0.000298954	0	0	0	0	0	0	0	0	0	0	0	0	0	0	0	0	0	0	0	0	0	0	0	0	0	0	0	0	7.43615e-07	0	4.20627e-06	1.10063e-06	1.05578e-05	0
Collinsella	0	0	0	0	0	0	0	0	0	0	0	0	0	0	0	0	0	0	0	0	0	0	0	0	0	0	0	0	0	0	0	0	0	0.000683382	0.000594277	0.000873852	0.00189418	0.0109056	0
Comamonas	0	0	0	0	0	0	0	0	0	0	0	0	0	0	0	0	0	0	0	0	0	0	0.0003427	0	0	0	0	0	0	0.000176435	0.00222147	0	0.000603438	0	0	0	1.10063e-06	1.17999e-05	2.90765e-05
Conchiformibius	0	0	0	0	0	0	0	0	0	0	0	0	0	0	0	0	0	0.000116877	0.000201207	0.000189717	0	0	0	0	0	0.000195963	0	0	0	0	0	0	0	0	0	0	0	0	0
Conexibacter	0	0	0	0	0	0	0	0	0	0	0	0	0	0	0	0	0	0	0	0	0	0	0	0	0	0	0	0	2.79572e-05	1.76435e-05	0.000949871	0	0	0	0	0	0	0	8.72296e-05
Coprobacillus	0	0	0	0	0	0	0	0	0	0	0	0	0	0	0	0	0	0	0	0	0	0	0	0	0	0	0	0	0	0	0	0	0	2.97446e-06	7.08316e-06	1.05157e-06	0	0	0
Coprococcus	0	0.000373552	0	0	0.000298954	0	0	0	0.000283849	0.00165017	0.00246184	0	0	0	0	0	0	0	0	0.000189717	0	0	0	0	0.000624142	0	0.000340483	0.000202143	0	0	0	0	0	0.0095205	0.00446593	0.00388554	0.00493466	0.00449515	0
Corallococcus	0	0	0	0	0	0	0	0	0	0	0	0	0	0	0	0	0	0	0	0	0	0	0	0	0	0	0	0	0	5.88118e-06	0	0	0	0	0	0	0	0	5.81531e-05
Corynebacterium	0	0.00186776	0.0041773	0.00842744	0.0113602	6.99154e-05	0.000328259	0.00191314	0.0011354	0.000825083	0.0014771	0.00564706	0.00129255	0.00133111	0	0	0.191486	0.00105189	0.150704	0.144565	0.00989834	0.17853	0.0287868	0.0500211	0	0	0.000340483	0.00242571	0.00387207	0.000358752	0.00228276	0.000324184	0.000817315	1.48723e-06	7.79148e-06	1.78766e-05	1.10063e-06	5.58943e-06	0.000697837
Couchioplanes	0	0	0	0	0	0	0	0	0	0	0	0	0	0	0	0	0	0	0	0	0	0	0	0	0	0	0	0	0.000405379	0	0	0	0	0	0	0	0	0	0
Cronobacter	0	0	0	0	0	0	0	0	0	0	0	0	0	0	0	0	0	0	0	0	0	0	0	0	0	0	0	0	0	0	0	0	0	1.78468e-05	5.66653e-06	0	2.75156e-06	7.7631e-05	0
Cupriavidus	0	0	0.000232072	0	0	0	4.10324e-05	0	0	0	0.000492368	0	0	0	0	0	0	0	0	0	0	0	0	0	0	0	0	0	0	0	0	0	0	0	0	0	0	0	0
Curtobacterium	0	0.000373552	0.00092829	0	0	0	0	0	0	0	0	0	0	0	0	0	0	0	0	0	0	0	0	0	0	0	0	0	0	0	0	0	0	1.48723e-06	0	0	0	0	0
DA101	0	0.00373552	0.0227431	0.00286533	0.00179372	0.000209746	0.00118994	0.0784389	0.00482543	0.00371287	0.00837026	0.00423529	0.00258509	0	0	0	0	0	0	0	0	0	0	0	0	0	0	0	0.000167743	0	0	0	7.63846e-06	0	0	0	0	0	5.81531e-05
Dactylosporangium	0	0.00224131	0.000464145	0.000337098	0.000298954	0	0	0.00975703	0.000851547	0.000412541	0	0.000470588	0.000861698	0	0	0	0	0	0	0	0	0	0	0	0	0	0	0	0	0	0	0	0	0	0	0	0	0	2.90765e-05
Dechloromonas	0	0	0	0	0	0	0	0	0	0	0	0	0	0	0	0	0	0	0	0.000189717	0	0	0.00017135	0	0	0	0	0	0	0	0	0	7.63846e-06	0	0	0	0	6.21048e-07	0
Dehalobacterium	0	0	0	0	0	0	0	0	0	0	0	0	0	0	0	0	0	0	0	0	0	0	0	0	0	0	0	0	0	0	0	0	0	0.000159877	0.000152288	0.000180869	2.20125e-06	7.26626e-05	0
Deinococcus	0	0.000747105	0.000232072	0.000337098	0.000298954	0	4.10324e-05	0	0.000851547	0	0.00393895	0	0	0	0	0	0	0	0	0	0	0	0	0	0	0	0	0	0	0	0	0	0	0	0	0	0	0	0
Dermabacter	0	0	0	0	0	0	0	0	0	0	0	0	0	0	0	0	0	0	0	0.000189717	0	0	0	0	0	0	0	0	0	0	0	0	0	0	0	0	0	0	0
Dermacoccus	0	0	0	0.000168549	0	0	0	0	0	0.00123762	0	0	0	0	0	0	0	0	0	0.000189717	0	0.000191351	0	0	0	0	0	0	0	0	0	0	0	0	0	0	0	0	0
Dermatophilus	0	0	0	0	0	0	0	0	0	0	0	0	0	0	0	0	0	0	0	0	0	0	0	0	0	0	0	0	0	0	0.000520897	0	0	0	0	0	0	0	5.81531e-05
Desmospora	0	0	0	0	0	0	0	0	0	0	0	0	0	0	0	0	0	0	0	0	0	0	0	0	0	0	0	0	0	4.11682e-05	0	0	0	0	0	0	0	0	0
Desulfobacter	0	0	0	0	0.000298954	0	0	0	0	0	0	0	0	0	0	0	0	0	0	0	0	0	0	0	0	0	0	0	0	0	0	0	0	0	0	0	0	0	0
Desulfobulbus	0	0	0	0	0	0	0	0	0	0	0	0	0	0	0	0	0	0	0	0	0	0	0	0	0	0	0	0	0	0	0	0	0	0	0	0	0	6.21048e-07	0
Desulfococcus	0	0	0	0	0	0	0	0	0	0	0	0	0	0	0	0	0	0	0	0	0	0	0	0	0	0	0	0	0	0	0	0	0	1.48723e-06	0	1.05157e-06	0	4.34734e-06	0
Desulfomicrobium	0	0	0	0	0	0	0	0	0	0	0	0	0	0	0	0	0	0	0	0	0	0	0	0	0	0	0	0	0	0	0	0	0	0	0	0	5.50313e-07	1.2421e-06	0
Desulfosporosinus	0	0	0	0	0	0	0	0	0	0	0	0	0	0	0	0	0	0	0	0	0	0	0	0	0	0	0	0	0	0	0	0	0	7.43615e-07	2.83326e-06	3.1547e-06	1.65094e-06	1.2421e-06	0
Desulfotomaculum	0	0	0	0	0	0	0	0	0	0	0	0	0	0	0	0	0	0	0	0	0	0	0	0	0	0	0	0	0	0	0	0	0	0	0	1.05157e-06	0	6.21048e-07	0
Desulfovibrio	0	0.000373552	0	0	0	0	0	0.000382629	0	0	0	0	0	0	0	0	0	0	0	0	0	0	0	0	0	0	0	0	0	0	0	0	0	0.00409806	0.000382491	0.000995834	9.96066e-05	0.00137376	0
Dethiobacter	0	0	0	0	0	0	0	0	0	0	0	0	0	0	0	0	0	0	0.000201207	0	0	0	0	0	0	0	0	0	0	0	0	0	0	0	0	0	0	0	0
Devosia	0	0.00149421	0.000232072	0.000168549	0.000298954	0.000209746	4.10324e-05	0.000382629	0.000283849	0.00742574	0.000492368	0	0.000861698	0	0	0	0	0	0	0	0	0	0	0	0	0	0	0	1.39786e-05	0.000164673	0	0	0	0	0	0	0	0	0
Dialister	0	0	0	0.000168549	0	0	0	0	0	0.000412541	0	0.00329412	0	0	0	0	0	0.000116877	0	0.00607095	0.00989834	0	0.0003427	0	0	0.000391926	0.00102145	0.00242571	0	0	0	0	0	0.00107452	0.00153421	0.00047636	1.65094e-06	0.000615459	2.90765e-05
Diaphorobacter	0	0	0	0	0.000298954	6.99154e-05	8.20647e-05	0	0	0	0.000492368	0.000470588	0	0	0	0	0	0	0	0.000379435	0	0	0	0	0	0	0	0	0	5.88118e-06	0	0	0.00044303	0	0	0	5.50313e-07	1.86314e-06	2.90765e-05
Didymeles	0	0	0	0	0	0	0	0	0	0	0	0	0	0	0	0	0	0	0	0	0	0	0	0	0	0	0	0	0	0	0	0	0	7.43615e-07	0	0	0	0	0
Dietzia	0	0	0	0.000168549	0	6.99154e-05	0	0	0	0	0.00344658	0	0	0	0	0	0	0	0	0	0	0	0	0	0	0	0	0	0	0	0	0	0	0	0	0	0	0	0
Dok59	0	0	0	0	0	0	0	0	0	0	0	0	0	0	0	0	0	0	0	0	0	0	0	0	0	0	0	0	0	0	0	0	0	0	0	0	0	2.48419e-06	0
Dorea	0	0	0	0	0	0	0	0	0	0	0	0	0	0	0	0	0	0	0	0	0	0	0	0	0	0	0	0	0	0	0	0	0	0.00768229	0.0112077	0.00367417	0.0107729	0.00886733	0
Dysgonomonas	0	0	0	0	0	0	0	0	0	0	0	0	0	0	0	0	0	0	0	0	0	0	0	0	0	0	0	0	0	0	0	0	0	0	0	0	5.50313e-07	0	0
Edwardsiella	0	0	0	0	0	0	0	0	0	0	0	0	0	0	0	0	0	0	0	0	0	0	0	0	0	0	0	0	0	0	0	0	0	4.46169e-06	2.12495e-06	0	2.75156e-06	1.2421e-05	0
Eggerthella	0	0	0	0	0	0	0	0	0	0	0	0	0	0	0	0	0	0	0	0	0	0	0	0	0	0	0	0	0	0	0	0	0	7.43615e-07	1.41663e-06	0	0	0	0
Eikenella	0	0	0	0	0	0	0	0	0	0	0	0	0	0	0	0	0.00474637	0.000584385	0.00241449	0.00322519	0.00107009	0.00133946	0	0.00295483	0.000249657	0.000195963	0.000170242	0.000202143	0	0	0	0	0	7.43615e-07	0	0	0	0	0
Elusimicrobium	0	0	0	0	0	0	0	0	0	0	0	0	0	0	0	0	0	0	0	0	0	0	0	0	0	0	0	0	0	0	0	0	0	0	0	2.10313e-06	0	0	0
Ensifer	0	0	0	0	0	0	0	0	0	0	0	0	0	0	0	0	0	0	0	0	0	0	0	0	0	0	0	0	1.39786e-05	0	0	0	0	0	0	0	0	0	0
Enterobacter	0	0	0	0	0	0	0	0	0	0	0	0	0	0	0	0	0	0	0	0	0	0	0	0	0	0	0	0	0	0	3.0641e-05	0	0	1.41287e-05	3.54158e-06	1.05157e-05	0.000142531	2.04946e-05	0
Enterococcus	0	0	0	0.000168549	0	0	0	0	0	0	0	0	0	0	0	0	0.000889944	0.00292193	0.00160966	0.000758869	0	0.000382702	0.0003427	0.000844238	0.00137311	0.000979816	0.000510725	0.00101071	6.98929e-05	0	0.00713936	0	0	0.00565296	0.00229211	8.41253e-06	7.2091e-05	0.104136	0
Epulopiscium	0	0	0.000696217	0	0	0	0	0.000191314	0.000283849	0	0.0014771	0	0.000430849	0	0	0	0	0	0	0	0	0	0	0	0	0	0.000340483	0	0	0	0	0	0	5.94892e-06	6.37485e-06	5.67846e-05	1.48584e-05	2.48419e-06	0
Erwinia	0	0	0	0.000674195	0	0	0	0	0	0	0	0	0	0	0	0	0	0	0	0	0	0	0	0	0	0	0	0	0	9.40988e-05	0.00163929	0.000108061	0.000152769	0.000103362	2.40827e-05	1.57735e-05	0.000224528	0.000331019	0.000261689
Erythromicrobium	0	0	0	0	0	6.99154e-05	0	0.000191314	0.000567698	0	0.00295421	0	0	0	0	0	0	0	0	0	0	0	0	0	0	0	0	0	0	0	0	0	0	0	0	0	0	0	0
Escherichia	0	0	0	0	0	0	0	0	0	0	0	0	0	0	0	0	0	0	0	0	0	0	0	0	0	0	0	0	0	0	0	0	0	0	0	0	0	1.86314e-06	0
Ethanoligenens	0	0	0	0	0	0	0	0	0	0	0	0	0	0	0	0	0	0	0	0	0	0	0	0	0	0	0	0	0	8.23365e-05	0	0	0	0	0	0	0	6.21048e-07	0
Eubacterium	0	0	0	0	0	0	0	0	0	0	0	0	0	0	0	0	0	0	0	0	0	0	0	0	0	0	0	0	0	0	0	0	0	0.0131263	0.0169358	0.00552388	0.0211667	0.00478207	0
Euzebya	0	0	0	0	0	0	0	0	0	0.000825083	0.000492368	0	0	0	0	0	0	0	0	0	0	0	0	0	0	0	0	0	6.98929e-05	0.000135267	0.000153205	0.000324184	0.000145131	0	0	0	0	0	2.90765e-05
Ewingella	0	0	0	0	0	0	0	0	0	0	0	0	0	0	0	0	0	0	0	0	0	0	0	0	0	0	0	0	0	0	0	0	0	0	0	0	0	1.86314e-06	0
Facklamia	0	0	0	0	0	0	0	0	0	0	0	0	0	0	0	0	0	0	0	0	0	0	0	0	0	0	0	0	0	0	0	0	0	2.23084e-06	2.12495e-06	1.05157e-06	1.10063e-06	1.86314e-05	0
Faecalibacterium	0	0.000747105	0	0.000337098	0.0334828	0.000209746	0	0.000765257	0.000851547	0.000825083	0.00196947	0	0.00129255	0	0	0	0	0	0	0	0	0	0	0	0.000124828	0	0	0	0	0	0	0	0	0.146439	0.142482	0.0699586	0.105416	0.023883	8.72296e-05
Filifactor	0	0	0	0	0	0	0	0	0	0	0	0	0	0	0	0	0	0	0	0.000189717	0.00882825	0	0.00188485	0.00274377	0	0	0	0.000202143	0	0	0	0	0	0	0	0	0	0	0
Fimbriimonas	0	0	0	0	0	0	0	0.000382629	0	0	0	0	0	0	0	0	0	0	0	0	0	0	0	0	0	0	0	0	0	0	0	0	0	0	0	0	0	0	0
Flavisolibacter	0	0	0	0	0.000298954	0	0	0.000191314	0	0	0.00196947	0	0.000861698	0	0	0	0	0	0	0	0	0	0	0	0	0	0	0	0.00194302	0	0	0	0	0	0	0	0	0	8.72296e-05
Flavobacterium	0	0	0	0	0	0	0	0	0	0	0	0	0	0	0	0	0.00192821	0.000116877	0.000603622	0.00322519	0.000535045	0.000574053	0	0.0010553	0.000124828	0	0	0.000202143	0	0.000388158	7.66025e-05	0	0.000168046	0	0	0	0	0	0
Flexispira	0	0	0	0	0	0	0	0	0	0	0	0	0	0	0	0	0	0	0	0	0	0	0	0	0	0	0	0	0	0	0	0	0	0	0	0	5.50313e-07	0	0
Fluviicola	0	0	0	0	0	0	0	0	0	0	0	0	0	0	0	0	0	0	0	0	0	0	0	0	0	0	0	0	0	3.52871e-05	0	0	0	0	0	0	0	0	0
Frankia	0	0	0	0	0	0	0	0.000191314	0	0	0	0	0	0	0	0	0	0	0	0	0	0	0	0	0	0	0	0	0	0	0	0	0	0	0	0	0	0	0
Frigoribacterium	0	0	0	0	0	0	0	0	0	0	0	0	0	0	0	0	0	0	0	0	0	0	0	0	0.000124828	0	0	0	0	0	0	0	0	0	0	0	0	0	0
Fulvivirga	0	0	0	0	0	0	0	0	0	0	0	0.000470588	0	0	0	0	0	0	0	0	0	0	0	0	0	0	0	0	0	0	0	0	0	0	0	0	0	0	0
Fusibacter	0	0	0	0	0	0	0	0	0	0	0	0	0	0	0	0	0	0	0	0	0	0	0	0.00021106	0	0.000195963	0	0	0	0	0	0	0	0	0	0	0	0	0
Fusobacterium	0	0	0.000232072	0.000168549	0	0	0	0.000191314	0	0	0	0	0	0	0	0	0.0768318	0.0224404	0.00301811	0.128818	0.272606	0.0679296	0.124058	0.247573	0.163275	0.0564374	0.00868233	0.0966242	0	0	0	0	0	8.17976e-06	7.08316e-07	7.36097e-05	1.10063e-06	3.10524e-06	2.90765e-05
Gallibacterium	0	0	0	0	0	0	0	0	0	0	0	0	0	0	0	0	0	0	0	0	0	0	0	0	0	0	0	0	0	0	0	0	0	7.43615e-06	0	1.05157e-06	5.50313e-07	0	0
Gallicola	0	0	0	0	0	0	0	0	0	0	0	0	0	0	0	0	0	0	0	0	0.000802568	0	0	0.000422119	0	0	0	0	0	0	0	0	0	0	0	0	0	0	0
Garciella	0	0	0	0	0	0	0	0	0	0	0	0	0	0	0	0	0	0	0	0	0	0	0	0	0	0	0	0	0	0	0	0	0	0	0	1.05157e-06	0	0	0
Gardnerella	0	0	0	0	0	0	0	0	0	0	0	0	0	0	0	0	0	0	0	0	0	0	0	0	0	0	0	0	0	0	0	0	0	0	0	3.1547e-06	1.10063e-06	0	0
Gemella	0	0	0	0	0	0	0	0	0	0	0	0	0	0	0	0	0.00103827	0.0134409	0.00261569	0.000569152	0.000267523	0.000765404	0.00856751	0.000633179	0.000873799	0.00156771	0.000170242	0.00485143	0	0	0	0	2.29154e-05	9.66699e-06	1.48746e-05	1.26188e-05	3.85219e-06	1.86314e-06	0
Gemmata	0	0.000373552	0.000232072	0	0	0	0	0.00248709	0.000283849	0	0	0	0	0	0	0	0	0	0	0	0	0	0	0	0	0	0	0	0.000307529	0.000682216	0	0.000108061	0.000404838	0	0	0	0	0	0
Geobacillus	0	0	0	0	0	0	0	0	0	0	0	0	0	0	0	0	0	0	0	0	0	0	0	0	0	0	0	0	1.39786e-05	5.88118e-06	4.59615e-05	0	0	0	9.77476e-05	3.47017e-05	1.9261e-05	6.21048e-07	0
Geodermatophilus	0	0	0	0	0	0	0	0	0	0	0	0	0	0	0	0	0	0	0	0	0	0	0	0	0	0	0	0	0.0017613	5.88118e-06	0	0	2.29154e-05	0	0	0	0	0	0
Giesbergeria	0	0	0	0	0	0	0	0	0	0	0	0	0.000430849	0	0	0	0	0	0	0	0	0	0	0	0	0	0	0	0	0	0	0	0	0	0	0	0	1.86314e-06	0
Glaciecola	0	0	0	0	0	0	0	0	0	0	0	0	0	0	0	0	0	0	0	0	0	0	0	0	0	0	0	0	0	0	0	0	0	7.43615e-07	0	0	0	6.21048e-07	0
Glycomyces	0	0	0	0	0	0	0	0.000191314	0	0	0	0	0	0	0	0	0	0	0	0.000758869	0	0	0	0.000422119	0	0	0	0	0.000111829	0	0	0	0	0	0	0	0	0	0
Gordonia	0	0	0	0	0	0	0	0	0	0	0	0	0	0	0	0	0	0	0	0	0	0	0	0	0	0	0	0	0	0	0.000260449	0	0	0	0	0	0	0	0
Gracilibacillus	0	0	0	0	0	0	0	0	0	0	0	0	0	0	0	0	0	0	0	0	0	0	0	0	0	0	0	0	0	0	0	0	0	7.43615e-07	0	0	0	0	0
Granulicatella	0	0	0	0	0	0	0	0	0	0	0	0	0	0	0	0	0	0.000116877	0	0	0	0	0	0	0	0	0	0	0	0	0	0	0	0	0	0	0	0	0
Granulicatella	0	0	0	0	0	6.99154e-05	0	0	0	0	0	0.000941176	0.000861698	0	0	0	0.00163156	0.00642824	0.00382294	0.000569152	0	0.00114811	0.00119945	0.000844238	0.00436899	0.00274348	0.00153218	0.00464928	0	0	1.53205e-05	0	0	7.7336e-05	2.12495e-05	1.26188e-05	2.20125e-05	0.000382566	0
HA73	0	0	0	0	0	0	0	0	0	0	0	0	0	0	0	0	0	0	0	0	0.000267523	0	0	0.000844238	0	0	0	0	0	0	0	0	0	0	0	0	0	0	0
Haemophilus	0	0	0	0	0	0	0	0	0	0	0	0	0	0	0.00019468	0	0.000889944	0.0179991	0.0772636	0.0263707	0.0058855	0.0355913	0.00719671	0.010553	0.217701	0.17186	0.0192373	0.118658	0	0	0	0	0	0.00468626	0.000115456	0.00156894	0.00101478	1.17999e-05	0
Hafnia	0	0	0	0	0	0	0	0	0	0	0	0	0	0	0	0	0	0	0	0	0	0	0	0	0	0	0	0	0	0	0	0	0	1.48723e-06	0	0	0	8.69467e-06	0
Herminiimonas	0	0	0	0	0	0	0	0	0	0	0	0	0	0	0	0	0	0	0	0	0	0	0	0	0	0	0	0	0	0	0	0	0	0	9.20811e-06	9.4641e-06	2.58647e-05	4.34734e-06	2.90765e-05
Hespellia	0	0	0	0	0	0	0	0	0	0	0	0	0	0	0	0	0	0	0	0	0	0	0	0	0	0	0	0	0	0	0	0	0	7.43615e-07	0	0	0	0	0
Holdemania	0	0	0	0	0	0	0	0	0	0	0	0	0	0	0	0	0	0	0	0	0	0	0	0	0	0	0	0	0	0	0	0	0	1.41287e-05	2.12495e-06	4.20627e-06	1.10063e-05	9.93677e-06	0
Hydrogenophaga	0	0	0	0	0	0	0	0	0	0	0	0	0	0	0	0.0103884	0	0	0	0	0	0	0	0	0	0	0	0	0	2.35247e-05	0.00150141	0	0.000359007	1.48723e-06	7.08316e-07	0	5.50313e-07	7.45258e-06	0
Hydrogenophilus	0	0.00186776	0.00092829	0.0267993	0.000597907	0.000349577	0.000369291	0.0013392	0.000851547	0.00206271	0.000492368	0	0.000430849	0	0	0	0	0	0	0	0	0	0	0	0	0	0	0	0	0	0	0	0	0	0	0	0	0	0.000290765
Hylemonella	0	0	0	0	0	0	0	0	0	0	0	0	0	0	0	0	0	0	0	0	0	0	0	0	0	0	0	0	0	0	0	0	0	0	0	0	5.50313e-07	1.2421e-06	0
Hymenobacter	0	0.00149421	0.00765839	0.000505646	0	0	4.10324e-05	0.00114789	0	0.000412541	0.014771	0	0.0017234	0	0	0	0	0	0	0.000379435	0	0	0	0	0	0	0.000170242	0.000606428	0	0	0	0	0	0	0	0	0	0	2.90765e-05
Isobaculum	0	0	0	0	0	0	0	0	0	0	0	0	0	0	0	0	0	0	0	0	0	0	0	0	0	0	0	0	0	0	0	0	0	0	0	0	0	6.21048e-07	0
Janibacter	0	0	0.000232072	0	0	0	0	0	0	0	0	0	0	0	0	0	0	0	0	0	0	0	0	0	0	0	0	0	0	0	4.59615e-05	0	0	0	0	0	0	0	0.050913
Janthinobacterium	0	0	0	0	0	0	0.000615486	0.000191314	0	0.00123762	0.000492368	0	0	0	0	0	0	0	0	0	0	0	0	0	0.000249657	0	0	0	0	0	0	0	0	3.71807e-06	0	2.10313e-06	2.36635e-05	0	0
Jeotgalicoccus	0	0	0	0	0	0	0	0	0	0	0	0	0	0	0	0	0	0	0	0	0	0	0	0.00021106	0	0	0	0	0	0	0	0	0	0	0	0	0	0	0
JG37-AG-70	0	0	0	0	0	0	0	0	0	0	0	0	0	0	0	0	0	0	0	0	0	0	0	0	0	0	0	0	0.000419358	0	0	0	0	0	0	0	0	0	0
KD1-23	0	0	0	0.000168549	0.000298954	0.000209746	8.20647e-05	0	0	0	0	0	0	0	0	0	0	0	0	0	0	0	0	0	0	0	0	0	0	0	0	0	0	0	0	0	0	0	8.72296e-05
Kibdelosporangium	0	0	0	0	0	0	0	0	0	0	0	0	0	0	0	0	0	0	0	0	0	0	0	0	0	0	0	0	0	2.94059e-05	0	0	3.81923e-05	0	0	0	0	0	0
Kineococcus	0	0	0.00139243	0.000168549	0	0	4.10324e-05	0.000191314	0	0	0.000492368	0	0	0	0	0	0	0	0	0	0	0	0	0	0	0	0	0	0	0	0	0	0	0	0	0	0	0	2.90765e-05
Kineosporia	0	0	0	0	0	0	0	0	0	0	0	0	0	0	0	0	0	0	0	0	0	0	0	0	0	0	0	0	0	0	0	0	0	0	0	0	0	6.21048e-07	0
Kingella	0	0	0	0	0	0	0	0	0	0	0	0	0	0	0	0	0.010976	0.000467508	0.0239437	0.0159363	0.00107009	0.00191351	0	0.00358801	0.000873799	0.000783853	0.000510725	0.000808571	0	0	0	0	0	0	0	0	0	0	0
Kitasatospora	0	0.000747105	0.000232072	0	0	0	4.10324e-05	0.000191314	0	0	0.000492368	0.00141176	0	0	0	0	0	0	0	0	0	0	0	0	0	0	0	0	0	0	0	0	0	0	0	0	0	0	0
Klebsiella	0	0	0	0	0	0	0	0	0	0	0	0	0	0	0	0	0	0	0	0	0	0	0	0.00021106	0	0	0	0.000202143	0	1.17624e-05	0.00090391	0	4.58307e-05	0.000794924	6.9415e-05	0.00119458	0.00944117	0.000129178	0
Knoellia	0	0	0	0	0	0	0	0	0	0	0	0	0	0	0	0	0	0	0	0	0	0	0	0	0	0	0	0	0	0	0	0	0	0	0	0	0	6.21048e-07	0.000319842
Kocuria	0	0.00224131	0.000696217	0.0244396	0.000896861	6.99154e-05	0.000205162	0.00172183	0.0011354	0.00330033	0.00196947	0.0127059	0.00129255	0	0	0	0	0	0.000402414	0	0	0	0	0	0	0	0	0	0	0	0	0	0	0	0	0	0	0	0.000116306
Kribbella	0	0	0.000464145	0	0	0	0	0	0	0	0	0	0	0	0	0	0	0	0	0	0	0	0	0	0	0	0	0	0.000335486	0.00129386	0	0	0	0	0	0	0	0	0.000203536
Kutzneria	0	0	0	0	0	0	0	0	0	0	0	0	0	0	0	0	0	0	0	0	0	0	0	0	0	0	0	0	0.000475272	0	0	0	7.63846e-06	0	0	0	0	0	0
Kytococcus	0	0	0	0	0	0	0	0	0	0	0	0	0	0	0	0	0	0	0	0	0	0	0	0	0	0	0	0	0	0	0.000796666	0	0	0	0	0	0	0	0
L7A_E11	0	0	0	0	0	0	0	0	0	0	0	0	0	0	0	0	0	0	0	0	0	0	0.00017135	0	0	0	0	0	0	0	0	0	0	0	0	0	0	0	0
Laceyella	0	0.00112066	0.000696217	0.000842744	0.000896861	0.000209746	0.000164129	0.000191314	0.000851547	0.00412541	0.0251108	0	0.00129255	0	0	0	0	0	0	0	0	0	0	0	0	0	0	0	0	0	0	0	0	0	0	0	0	0	2.90765e-05
Lachnobacterium	0	0	0	0	0	0	0	0	0	0	0	0	0	0	0	0	0	0	0	0	0	0	0	0	0	0	0	0	0	0	0	0	0	0.000900518	0.000469614	0.000538402	0.00834384	6.02417e-05	0
Lachnospira	0	0	0	0	0	0	0	0	0	0	0	0	0	0	0	0	0	0	0	0	0	0	0	0	0	0	0	0	0	0	0	0	0	0.00538823	0.00810597	0.00187074	0.0121124	0.0032574	0
Lacticigenium	0	0	0	0	0	0	0	0	0	0	0	0	0	0	0	0	0	0	0	0	0	0	0	0	0	0	0	0	0	0	0	0	0	0	0	0	0	6.21048e-07	0
Lactobacillus	0	0.00149421	0.0104433	0.000505646	0	0.000139831	0.000123097	0.000765257	0.00369004	0.00288779	0.00295421	0.000941176	0.00215424	0	0	0	0.000889944	0.00140252	0.00321932	0.000189717	0.000267523	0.000382702	0.0003427	0.000633179	0.00112346	0.000783853	0.00153218	0.000808571	0	0.000111742	0	0	0.000236792	0.00302131	0.00315767	0.000491082	0.000218474	0.0021097	0.005699
Lapillicoccus	0	0	0.000232072	0.000337098	0	0	4.10324e-05	0	0	0	0	0	0	0	0	0	0	0	0	0	0	0	0	0	0	0	0	0	0	0	0	0	0	0	0	0	0	0	8.72296e-05
Lautropia	0	0	0	0	0	0	4.10324e-05	0	0	0	0	0	0	0	0	0	0.00177989	0	0.00603622	0.0119522	0.000535045	0.0160735	0.0010281	0.0208949	0	0	0.000340483	0.00566	0	0	0	0	0	2.97446e-06	0	0	0	1.86314e-06	0
Legionella	0	0	0	0	0	0	0	0	0	0	0	0	0	0	0	0	0	0	0	0	0	0	0	0	0.000124828	0	0	0	0	5.29306e-05	0	0	0	0	0	0	0	0	0
Lentibacillus	0	0	0	0	0	0	0	0	0	0	0	0	0	0	0	0	0	0	0	0	0	0	0	0	0	0	0	0	0	0	0	0	0	0	7.08316e-07	0	0	1.2421e-06	0
Lentzea	0	0	0	0	0	0	0	0	0	0	0	0	0	0	0	0	0	0	0	0	0	0	0	0	0	0	0	0	4.19358e-05	1.76435e-05	0	0	4.58307e-05	0	0	0	0	0	8.72296e-05
Leptothrix	0	0	0.000232072	0	0.000597907	0.0009089	8.20647e-05	0.000191314	0	0	0	0.000941176	0	0	0	0	0	0	0	0	0	0	0	0	0	0	0	0	0	0	0	0	0	0	0	0	5.50313e-07	0	0.000232612
Leptotrichia	0	0	0	0	0	0	0	0	0	0	0	0	0	0	0	0	0.15841	0.00268817	0.0028169	0.0692468	0.0024077	0.0840031	0.0010281	0.0276488	0.015978	0.00176367	0.00732039	0.0109157	0	0	0	0	2.29154e-05	7.43615e-07	0	1.05157e-06	0	0	0
Leucobacter	0	0	0	0	0	0	0	0	0	0	0	0	0	0	0	0	0	0	0	0	0	0	0	0	0	0	0	0	0	0	0	0	1.52769e-05	7.43615e-07	0	0	0	0	2.90765e-05
Leuconostoc	0	0	0	0	0	0	0	0	0	0	0	0	0	0	0	0	0	0	0	0	0	0	0	0	0	0	0	0	0	0	0	0	0.000824953	8.17976e-06	0	3.1547e-06	3.30188e-06	8.07363e-06	0
Limnobacter	0	0	0	0	0	0	0	0	0	0	0	0	0	0	0	0	0	0	0	0	0	0	0	0	0.000249657	0	0	0	0	0	0	0	0	0	0	0	0	0	0
Limnohabitans	0	0	0.000232072	0	0	0.000209746	4.10324e-05	0	0	0	0	0	0	0	0	0	0	0	0	0	0	0	0	0	0	0	0	0	0.000475272	0.00262889	0.000750705	0.000216123	0.000106938	0	0	1.05157e-06	4.4025e-06	5.40312e-05	0.000319842
Listeria	0	0	0	0	0	0	0	0	0	0	0	0	0	0	0	0	0	0	0	0	0	0	0	0	0	0	0	0	0	0	0	0	0	2.23084e-06	4.2499e-06	0	5.50313e-07	8.32205e-05	0
Luteimicrobium	0	0.00448263	0.000464145	0.000337098	0	6.99154e-05	4.10324e-05	0.00210446	0.000283849	0	0	0.000470588	0.00473934	0	0	0	0	0	0	0	0	0	0	0	0	0	0	0	0	0	0	0	0	0	0	0	0	0	2.90765e-05
Luteimonas	0	0	0	0	0	0	0	0	0	0	0	0	0	0	0	0	0	0	0	0	0	0	0	0	0	0	0	0	0	0	0	0	0	0	0	0	0	6.21048e-07	0
Luteolibacter	0	0	0	0	0	0	0	0	0	0	0	0	0	0	0	0	0	0	0	0	0	0	0	0	0	0	0	0	0	0	0	0	0.000359007	0	0	0	0	0	0
Lysinibacillus	0	0.000373552	0	0.000337098	0	0	0	0	0.000283849	0	0	0.000941176	0	0	0	0	0	0	0	0	0	0	0	0	0	0	0	0	2.79572e-05	0.000147029	0	0	0	5.94892e-06	2.12495e-06	1.05157e-06	5.50313e-07	2.6084e-05	0.000290765
Lysobacter	0	0.00298842	0.00162451	0.00117984	0.00179372	0.000699154	0.0087399	0.0026784	0.0011354	0.00453795	0.00393895	0.00235294	0.00301594	0	0	0	0	0	0	0	0	0	0	0	0	0	0	0	0	0	0	0	0	0	0	0	0	0	0.000494301
Macrococcus	0	0	0	0	0	0	0	0	0	0	0	0	0	0	0	0	0	0	0	0	0	0	0	0	0	0	0	0	0	5.29306e-05	0	0	0	0	0	0	0	0	0
Mannheimia	0	0	0	0	0	0	0	0	0	0	0	0	0	0	0	0	0	0	0.000201207	0	0	0	0	0	0.000624142	0	0	0.000202143	0	0	0	0	0	0	0	0	0	0	0
Maribius	0	0	0	0	0	0	0	0	0	0	0	0	0	0	0	0	0	0	0	0	0	0	0	0	0	0	0	0	0	5.88118e-06	0	0	0	0	0	0	0	0	0
Marinibacillus	0	0	0	0	0	0	0	0	0	0	0	0	0.000430849	0	0	0	0	0	0	0	0	0	0	0	0	0	0	0	0	0	0	0	0	0	0	0	0	0	0
Marinobacter	0	0	0	0	0	0	0	0	0	0	0	0	0	0	0	0	0	0	0	0	0	0	0	0	0	0	0	0	0	0	0	0	0	0	0	1.05157e-06	0	0	0
Megamonas	0	0	0	0	0	0	0	0	0	0	0	0.000470588	0	0	0	0	0	0	0	0	0	0	0	0	0	0	0	0	0	0	0	0	0	1.48723e-06	0	0	0	0	0
Megasphaera	0	0.000747105	0.000232072	0	0.000298954	0.000139831	0	0.000765257	0.000851547	0.000412541	0	0.00141176	0.000861698	0	0	0	0	0	0	0	0.000267523	0	0	0.00021106	0	0.000783853	0.00595846	0.000404285	0	0	0	0	0	0.013098	1.98329e-05	3.25986e-05	2.75156e-06	1.86314e-05	0
Melissococcus	0	0	0	0	0	0	0	0	0	0	0	0	0	0	0	0	0	0	0	0	0	0	0	0	0	0	0	0	0	0	0	0	0	0	1.41663e-06	0	0	3.47787e-05	0
Mesorhizobium	0	0.000747105	0.000232072	0.000168549	0.000597907	6.99154e-05	0.000246194	0.00153051	0.0011354	0.00371287	0.00344658	0.000470588	0.00473934	0	0	0	0	0	0	0	0	0	0	0	0	0	0	0	0.000978501	0	0	0	0	0	0	0	0	0	0.000610607
Methanobrevibacter	0	0	0	0	0	0	0	0	0	0	0	0	0.000430849	0	0	0	0	0	0	0	0	0	0	0	0	0	0	0	0	0	0	0	0	0.000408245	2.33744e-05	0.00119668	2.36635e-05	0.00246059	0
Methanolobus	0	0	0.000232072	0	0	0	0	0	0	0	0	0	0	0	0	0	0	0	0	0	0	0	0	0	0	0	0	0	0	0	0	0	0	0	0	0	0	0	0
Methanosphaera	0	0	0	0	0	0	0	0	0	0	0	0	0	0	0	0	0	0	0	0	0	0	0	0	0	0	0	0	0	0	0	0	0	0	0	0	2.75156e-06	0	0
Methylibium	0	0.000373552	0	0	0	0.000419492	0	0	0.000283849	0	0	0	0	0	0	0	0	0	0	0.000189717	0	0	0	0	0	0	0	0	4.19358e-05	0	0	0	3.05538e-05	0	7.79148e-06	5.04752e-05	2.03616e-05	0.000381945	0.000523378
Methylobacterium	0	0.000747105	0.00092829	0.000168549	0.000298954	0.00524366	8.20647e-05	0.000382629	0	0.000825083	0.000492368	0.000470588	0.000430849	0	0	0	0	0	0	0	0	0	0	0	0	0	0	0	0	0	0	0	8.4023e-05	0	7.08316e-07	2.10313e-06	0	1.86314e-06	8.72296e-05
Methylophaga	0	0	0	0	0	0	0	0	0	0	0	0	0	0	0	0	0	0	0	0	0	0	0	0	0	0	0	0	0	0	0	0	0	0	0	1.05157e-06	0	4.96839e-06	0
Methylovorus	0	0	0	0	0	0	0	0	0	0	0	0	0	0	0	0	0	0	0	0	0	0	0	0	0	0	0	0	0	0	0	0	0	0	0	0	0	6.21048e-07	0
Microbacterium	0	0	0	0	0	0	0	0	0	0	0	0	0	0.000332779	0	0	0	0	0	0.000189717	0	0	0	0	0	0	0	0	0	0	0	0	0	0	0	0	0	0	0
Microbispora	0	0	0	0	0	0	0	0	0	0	0	0	0	0	0	0	0	0	0.000201207	0	0	0	0	0	0	0	0	0	0	0	0	0	0	0	0	0	0	0	0
Microbispora	0	0	0	0	0	0	0	0	0	0	0	0	0	0	0	0	0	0	0	0	0	0	0	0	0	0	0	0	0	0	0.000750705	0	0	0	0	0	0	0	2.90765e-05
Micrococcus	0	0	0.000232072	0.000337098	0	0	0	0	0	0	0	0	0	0	0	0	0.000444972	0.000116877	0	0	0	0	0	0	0	0	0	0	0	5.88118e-06	0.000704743	0.000324184	0	0	0	0	0	6.21048e-07	0.00558269
Mitsuaria	0	0	0	0	0	6.99154e-05	0	0	0	0	0	0.000470588	0	0	0	0	0	0	0	0	0	0	0	0	0	0	0	0	0	0	0	0	0	0	0	0	0	0	5.81531e-05
Mitsuokella	0	0	0	0	0	0	0	0	0	0	0	0	0	0	0	0	0	0	0	0	0.000267523	0	0	0	0	0	0	0	0	0	0	0	0	0.0175471	4.95821e-06	0.00237549	0.00118537	0.000125452	0
Mobiluncus	0	0	0	0	0	0	0	0	0	0	0	0	0	0	0	0	0	0	0	0	0	0	0	0	0	0.000783853	0	0	0	0	0	0	0	0	7.08316e-07	5.25783e-06	0	1.2421e-06	0
Modestobacter	0	0.000373552	0.000232072	0	0	0	0	0.000191314	0.000567698	0	0.000984737	0.00376471	0.000430849	0	0	0	0	0	0	0	0	0	0	0	0	0	0	0	0	1.17624e-05	0	0	0	0	0	0	0	0	0
Mogibacterium	0	0	0	0	0	0	0	0	0	0	0	0	0	0	0	0	0	0	0	0	0	0.000191351	0	0	0	0.000587889	0.000851209	0.000202143	0	0	0	0	0	1.78468e-05	4.2499e-06	1.68251e-05	5.50313e-07	6.83153e-06	0
Morganella	0	0	0	0	0	0	0	0	0	0	0	0	0	0	0	0	0	0	0	0	0	0	0	0	0	0	0	0	0	0	0	0	0	7.43615e-07	8.49979e-06	5.25783e-06	2.20125e-06	0	0
Moryella	0	0	0	0	0	0	0	0	0	0	0	0	0	0	0	0	0	0	0.000201207	0	0	0	0	0	0.00287105	0.00156771	0.000851209	0.000606428	0	0	0	0	0	3.34627e-05	9.20811e-06	1.78766e-05	1.9261e-05	5.58943e-06	0
Mucispirillum	0	0	0	0	0	0	0	0	0	0	0	0	0.000430849	0	0	0	0	0	0	0	0	0	0	0	0	0	0	0	0	0	0	0	0	0	0	0	0	0	0
Mycoplana	0	0	0	0	0	0	0	0	0	0	0	0	0	0	0	0	0	0	0	0	0	0	0	0	0	0	0	0	0	0	0.00142481	0	0	0	0	0	0	0	0
Mycoplasma	0	0	0	0	0	0	0	0	0	0	0	0	0	0	0	0	0	0	0	0	0.000267523	0	0	0.00021106	0	0	0	0.000202143	0	0	0	0	0	0	0	0	0	0	0
Myxococcus	0	0	0	0	0	0	0	0	0	0	0	0	0	0	0	0	0	0	0	0	0	0	0	0	0	0	0	0	6.98929e-05	0	0	0	0	0	0	0	0	0	0
Neisseria	0	0	0	0	0	0	0	0	0	0	0	0	0	0	0	0	0.00296648	0	0.00301811	0.00455322	0.00668807	0.00440107	0.00651131	0.0185732	0.0807639	0.00274348	0.000510725	0.00323428	4.19358e-05	1.17624e-05	0	0	0	2.30521e-05	7.08316e-07	2.10313e-06	5.50313e-07	6.21048e-07	0
Nelumbo	0	0	0	0	0	0	4.10324e-05	0	0	0	0	0	0	0	0	0	0	0	0	0	0	0	0	0	0	0	0	0	0	0	0	0	0	3.34627e-05	0	1.05157e-06	0	0	0
Nesterenkonia	0	0	0	0	0	0	0	0.000191314	0	0	0	0	0	0	0	0	0.000148324	0.000233754	0.000402414	0	0	0	0	0	0	0	0	0	1.39786e-05	0	0	0	0	0	0	0	0	0	0
Niabella	0	0	0	0	0	0	0	0	0	0	0	0	0	0	0	0	0	0	0	0	0	0	0	0	0	0	0	0	0	0.000317584	0	0	0	0	0	0	0	0	0
Niastella	0	0.00112066	0.00139243	0.000337098	0.000597907	6.99154e-05	0.00287227	0.00459154	0.00255464	0.00618812	0.00196947	0.048	0.0017234	0	0	0	0	0	0	0	0	0	0	0	0	0	0	0	0	0	0	0	0	0	0	0	0	0	0.000145383
Nitrobacter	0	0	0	0	0	0.000209746	4.10324e-05	0.000382629	0	0	0	0	0	0	0	0	0	0	0	0	0	0	0	0	0	0	0	0	0	0	0	0	0	0	0	0	0	0	0
Nitrobacteria	0	0	0	0	0	0.000489408	0	0	0	0	0	0	0	0	0	0	0	0	0	0	0	0	0	0	0	0	0	0	0	0	0	0	0	0	0	0	0	0	0
Nitrosomonas	0	0	0	0	0	0	0	0	0	0	0	0	0	0	0	0	0	0	0	0	0	0	0	0	0	0	0	0	0	0	0	0	0	0	0	0	0	1.2421e-06	0
Nitrosopumilus	0	0	0	0	0	0	0	0	0	0	0	0	0	0	0	0	0	0	0	0	0	0.000382702	0	0.00021106	0	0.000195963	0	0	0	0	0	0	0	0	0	0	0	0	0
Nitrosovibrio	0	0	0	0	0	0	0	0	0	0	0	0	0	0	0	0	0	0	0	0	0	0	0	0	0	0	0	0	0	0	0	0	0	0	0	0	5.50313e-07	0	0
Nitrospina	0	0	0	0	0	0	0	0	0	0	0	0	0	0	0	0	0	0	0	0	0	0	0	0	0	0.000195963	0	0	0	0	0	0	0	0	0	0	0	0	0
Nocardia	0	0	0	0	0	0	0	0	0	0	0	0	0	0	0	0	0	0	0	0.000189717	0	0	0	0	0	0	0	0	2.79572e-05	0	0.000245128	0	0	0	0	0	0	0	0
Nocardioides	0	0.000747105	0	0	0	0	0	0.000191314	0.000283849	0	0	0.000470588	0	0	0	0	0.000148324	0	0	0	0	0	0	0	0	0	0	0	0.0174033	0	0.000857948	0.000432246	7.63846e-06	0	0	0	0	0	8.72296e-05
Oceanicola	0	0	0	0	0	0	0	0	0	0	0	0	0	0	0	0	0	0	0	0	0	0	0	0	0	0	0	0	0	5.88118e-06	0	0	0	0	0	0	0	0	0
Ochrobactrum	0	0	0	0	0	0	0	0	0	0	0	0	0	0	0	0	0	0	0	0	0	0	0	0	0	0	0	0	0	1.17624e-05	0	0	7.63846e-06	7.43615e-07	0	0	0	0	0
Octadecabacter	0	0	0	0	0	0	0	0	0	0	0	0	0	0	0	0	0	0	0	0	0	0	0	0	0	0	0	0	0	0.000717504	0.000137885	0	0	0	0	0	0	0	0
Odoribacter	0	0	0	0	0	0	0	0	0	0	0	0	0	0	0	0	0	0	0	0	0	0	0	0	0	0	0	0	0	0	0	0	0	7.43615e-07	2.33744e-05	4.20627e-06	0.000148584	0.000501186	0
Opitutus	0	0	0	0	0	6.99154e-05	0	0.00114789	0	0.00123762	0	0	0	0	0	0	0	0	0	0	0	0	0	0	0	0	0	0	0.000125807	0	0	0	0	0	0	0	0	0	0
Oribacterium	0	0	0	0	0	0	0	0	0	0	0	0	0	0	0	0	0	0.000116877	0.000201207	0.000948587	0.000535045	0.000191351	0	0.00021106	0.00649107	0.00548697	0.0270684	0.0149586	0	0	0	0	0	3.94116e-05	2.12495e-06	4.20627e-06	6.05344e-06	4.34734e-06	0
Ornithinibacillus	0	0	0	0	0	0	0	0.000191314	0.000283849	0	0	0.000470588	0	0	0	0	0	0	0	0	0	0	0	0	0	0	0	0	0	0	0	0	0	0	0	0	0	0	0
Oscillospira	0	0.000373552	0.00208865	0	0	0	4.10324e-05	0.000382629	0	0.000412541	0	0	0	0	0	0	0	0	0	0	0	0	0	0	0	0	0	0	0	0	0	0	0	0.0050841	0.00490438	0.00833367	0.00370801	0.0115912	0
Oxalobacter	0	0	0	0	0	0	0	0	0	0	0	0	0	0	0	0	0	0	0	0	0	0	0	0	0	0	0	0	0	0	0	0	0	1.26415e-05	1.41663e-06	0.000153529	2.47641e-05	0.00046206	2.90765e-05
p-75-a5	0	0	0	0	0	0	0	0	0	0	0	0	0	0	0	0	0	0	0	0	0	0	0	0	0	0	0	0	0	0	0	0	0	0.000374038	0.00130259	0.00374358	3.30188e-06	0.000299966	0
Paenisporosarcina	0	0.000373552	0	0.000842744	0.000298954	0	4.10324e-05	0.000382629	0.000283849	0.000412541	0	0.000941176	0	0	0	0	0	0	0	0	0	0	0	0	0	0	0	0	0	0	0	0	0	0	0	0	0	0	0
Paludibacter	0	0	0.00440938	0	0	6.99154e-05	4.10324e-05	0.000191314	0	0	0.000492368	0	0	0	0	0	0	0	0	0.0246633	0.0987159	0	0	0.0194175	0	0	0.00170242	0.00161714	0	0	0	0	0	0	0	0	0	0	0
Pandoraea	0	0	0	0	0	0	0	0	0	0	0	0	0	0	0	0	0	0	0	0	0	0	0	0	0	0	0	0	0	0	0	0	0	0	0	0	0	6.21048e-07	0
Pantoea	0	0	0	0	0	0	0	0	0	0	0	0	0	0	0	0	0	0	0	0	0	0	0	0	0	0	0	0	0	0	1.53205e-05	0	0	0	0	0	0	0	0
Papillibacter	0	0	0	0	0	0	0	0	0	0	0	0	0	0	0	0	0	0	0	0	0	0	0	0	0	0	0	0	0	0	0	0	0	0	0	0	0	6.21048e-07	0
Parabacteroides	0	0	0	0.000168549	0	0	0	0.000191314	0	0	0.000492368	0	0	0	0	0	0.000148324	0	0.000201207	0	0.000267523	0	0	0	0	0	0	0	0	0	0	0	0	0.00055325	0.000545403	0.00191806	0.00198553	0.00072849	0
Paracoccus	0	0.00112066	0.00185658	0.00219113	0	0.000139831	0.000123097	0.000956572	0.0011354	0.00371287	0.009355	0	0.000430849	0.000332779	0	0.0194219	0	0	0	0	0	0	0.00017135	0	0	0	0	0	0	4.70494e-05	0	0	0.00138256	0	0	0	0	0	0.00139567
Paraprevotella	0	0	0	0	0	0	0	0	0	0	0	0	0	0	0	0	0	0	0	0	0	0	0	0	0	0	0	0	0	0	0	0	0	0	0	2.10313e-06	5.50313e-07	0	0
Parvimonas	0	0	0	0	0	0	0	0	0	0	0	0	0	0	0	0	0	0.000350631	0	0.00132802	0.00775816	0	0.0138794	0.00696496	0.000374485	0.000391926	0.000680967	0.00323428	0	0	0	0	0	0	0	9.4641e-06	2.20125e-06	0	0
Pasteuria	0	0	0	0	0	0	0	0	0	0	0	0	0	0	0	0	0	0	0	0	0	0	0	0	0	0	0	0	0	0	0.000444295	0	0	0	0	0	0	0	0
Paucibacter	0	0.000373552	0.000232072	0.000505646	0.000298954	0.00139831	8.20647e-05	0.000191314	0	0.000412541	0	0	0	0	0	0	0	0	0	0	0	0	0	0	0	0	0	0	0	0	0	0	0	0	0	0	0	0	0.000436148
Paucimonas	0	0	0	0.000168549	0	0	0	0	0	0	0	0	0	0	0	0	0	0	0	0	0	0	0	0	0	0	0	0	0	0	0	0	0	0	0	0	0	0	2.90765e-05
Pediococcus	0	0	0	0	0	0	0	0	0	0	0	0	0	0	0.000477851	0	0	0	0	0	0	0	0	0	0	0	0	0	0	0	0	0	0	0	0	0	0	0	0
Pedobacter	0	0	0	0	0	0	0.000451356	0	0	0	0.000492368	0	0	0	0	0	0	0	0	0	0	0	0	0	0	0	0	0	0	0	0	0	0	0	0	0	0	0	0
Pelosinus	0	0	0	0	0	0	0	0	0	0	0	0	0	0	0	0	0	0	0	0	0	0.000191351	0	0	0	0	0	0	0	0	0	0	0	0	0	0	0	0	0
Pelotomaculum	0	0	0	0	0	0	0	0	0	0	0	0	0	0	0	0	0	0	0	0	0	0	0	0	0	0	0	0	0	0	0	0	0	7.43615e-07	0	0	5.50313e-07	0	0
Peptococcus	0	0	0	0	0	0	0	0	0	0	0	0	0	0	0	0	0	0	0	0.000758869	0	0	0.00188485	0.000422119	0.000124828	0.000391926	0	0.000404285	0	0	0	0	0	0.00145154	0.00396799	0.00085913	6.05344e-06	0.00250717	0
Peptoniphilus	0	0.00747105	0.00394523	0.00101129	0.00209268	0.0969727	0.000369291	0.0026784	0.00198694	0.0070132	0.00837026	0.00564706	0.00560103	0	0	0	0	0	0.000201207	0.000189717	0.000535045	0	0	0.00485437	0.000374485	0	0	0.000202143	0	0	0	0	0	2.23084e-06	2.12495e-05	0.000118827	5.50313e-07	7.45258e-06	0.000319842
Peptostreptococcus	0	0	0	0	0	0	0	0	0	0	0	0	0	0	0	0	0	0	0	0	0.000802568	0	0	0	0.00074897	0.00529101	0	0.00828785	0	0	0	0	0	0	0	3.1547e-06	1.10063e-06	6.21048e-07	0
Persicobacter	0	0	0	0	0	0	0	0	0	0	0	0	0	0	0	0	0	0	0	0	0	0.000191351	0	0	0	0	0	0	0	0	0	0	0	0	0	0	0	0	0
ph2	0	0	0	0	0	0	0	0	0	0	0	0	0	0	0	0	0	0	0	0	0	0	0	0	0	0	0	0	0	0	0	0	0	0	7.08316e-07	1.68251e-05	0	1.2421e-06	0
Phascolarctobacterium	0	0	0	0	0	0	0	0	0	0	0	0	0	0	0	0	0	0	0	0	0	0	0	0	0	0	0.000851209	0	0	0	0	0	0	0.00233718	0.000800397	0.00797613	0.0117085	0.00110112	0
Phenylobacterium	0	0	0.000232072	0.000168549	0	0	0	0.000382629	0	0.000825083	0	0.000470588	0	0	0	0	0	0	0	0	0	0	0	0	0	0	0	0	0	0	0	0	2.29154e-05	0	0	0	0	6.21048e-07	0.000290765
Phycicoccus	0	0	0	0	0	0	0	0	0	0	0	0	0	0	0	0	0	0	0	0	0	0	0	0	0	0	0	0	0	0	0	0	0	0	0	0	0	0	0.000319842
Phytohabitans	0	0	0	0	0	0	0	0	0	0	0	0	0	0	0	0	0	0	0	0	0	0	0	0	0	0	0	0	2.79572e-05	0	0	0	7.63846e-06	0	0	0	0	0	2.90765e-05
Pimelobacter	0	0	0	0	0	0	0	0	0	0	0	0	0	0	0	0	0	0	0	0	0	0	0	0	0	0	0	0	1.39786e-05	2.94059e-05	0	0.000216123	2.29154e-05	0	0	0	0	0	0
Piscicoccus	0	0	0	0	0	0	0	0	0	0	0	0	0	0	0	0	0	0	0	0	0	0	0	0	0	0	0	0	0	0	0	0	0	0	0	0	0	1.2421e-06	0
Planctomyces	0	0	0	0	0	0	0	0	0.000283849	0	0	0.00376471	0	0	0	0	0	0	0	0	0	0	0	0.00021106	0	0	0	0	0	0	0	0	0	0	0	0	0	0	0
Planifilum	0	0	0	0	0	0	0	0	0	0	0	0	0	0	0	0	0	0	0	0	0	0	0	0	0	0	0	0	0	0.000993919	0	0.00389021	0	0	0	0	0	0	0
Planococcus	0	0	0	0	0	0	0	0	0	0	0	0	0	0	0	0	0	0	0	0	0	0	0	0	0	0	0	0	1.39786e-05	0	3.0641e-05	0	0	0	0	0	0	0	0
Planomicrobium	0	0	0.000232072	0.00185404	0.000298954	0	0	0	0	0.000825083	0	0.000941176	0.000861698	0	0	0	0	0	0	0	0	0	0	0	0	0	0	0	2.79572e-05	0	0	0	0	0	0	0	0	0	8.72296e-05
Pleomorphomonas	0	0	0	0	0	0	0	0	0	0	0	0	0	0	0	0	0	0	0	0	0	0	0	0	0	0	0	0	0	0	0	0.000108061	0	0	0	0	0	0	2.90765e-05
Plesiomonas	0	0	0	0	0	0	0	0	0	0	0	0	0	0	0	0	0	0	0	0	0	0	0	0	0	0	0	0	0	0	0	0	0	4.46169e-06	2.12495e-06	0	1.10063e-06	2.79472e-05	0
Polaromonas	0	0	0.00603388	0.000842744	0.000597907	0.000419492	0.000246194	0.000765257	0.000283849	0.000825083	0.000984737	0.000941176	0.0112021	0	0	0	0	0	0	0	0	0	0	0	0	0	0	0	0	0	0	0	0	0	0	0	0	0	0.000290765
Polyangium	0	0.000373552	0	0	0.000597907	6.99154e-05	0	0.000382629	0.000851547	0.00123762	0.000492368	0	0.00344679	0	0	0	0	0	0	0	0	0	0	0	0	0	0	0	0	0	0	0	0	0	0	0	0	0	0
Polynucleobacter	0	0	0	0	0	0	0	0	0	0.000412541	0	0	0	0	0	0	0	0	0	0	0	0	0	0	0	0	0	0	0	0	0	0	0	0	7.08316e-07	0	0	0	0
Pontibacillus	0	0	0	0	0	0	0	0	0	0	0	0	0	0	0	0	0	0	0	0	0	0	0	0	0	0	0	0	0	0	1.53205e-05	0	0	0	0	0	0	0	0
Porphyromonas	0	0	0	0	0	0	0	0	0	0	0	0	0	0.000332779	0.000725625	0	0.0252151	0.00198691	0.00321932	0.0360463	0.035313	0.153463	0	0.163149	0.0670328	0.0180286	0.00238338	0.124924	0	0	0	0	0	0	7.08316e-06	3.57533e-05	5.50313e-07	3.10524e-06	0
Pragia	0	0	0	0	0	0	0	0	0	0	0	0	0	0	0	0	0	0	0	0	0	0	0	0	0	0	0	0	0	0	0	0	0	7.43615e-06	4.2499e-06	0	1.65094e-06	4.16102e-05	0
Prauserella	0	0	0	0	0	0	0	0	0	0	0	0	0	0	0	0	0.00103827	0	0.00301811	0.000189717	0.000535045	0.000765404	0	0.000422119	0	0	0	0	0	0	0	0	0	0	0	0	0	0	0
Prevotella	0	0	0	0	0	0	0	0	0	0	0	0	0	0	0	0	0.0283299	0.00105189	0.00140845	0.0569152	0.209738	0.032147	0.0104524	0.0384128	0.042941	0.282971	0.265577	0.171619	0	0	0	0	0	0.200271	0.229142	0.223404	0.357393	0.0148002	0
Prevotella	0	0	0	0	0	0	0	0	0	0	0	0	0	0	0	0	0.00608128	0.00105189	0.00261569	0.00455322	0.0302301	0.000191351	0.000514051	0.0194175	0.0229684	0.0352734	0.0136193	0.0739842	0	0	0	0	0	0.0160695	0.00505667	0.00695086	0.000745124	0.00931634	0
Promicromonospora	0	0	0.000232072	0	0	0	0	0.000956572	0	0.000412541	0.00246184	0	0	0	0	0	0	0	0	0	0	0	0	0	0	0	0	0	0	0	0	0	0	0	0	0	0	0	2.90765e-05
Propionicimonas	0	0	0	0	0	0	0	0	0	0	0	0	0	0	0	0	0	0	0.000201207	0.000189717	0	0	0	0	0	0	0	0	0	0	0	0	0	0	0	0	0	0	0
Propionispira	0	0	0	0	0	0	0	0	0	0	0	0	0	0	0	0	0	0	0	0	0	0	0	0	0	0	0	0	0	0	0	0	0	0	2.12495e-06	0	0	0	0
Propionivibrio	0	0	0	0	0	0	0	0	0	0	0	0	0	0	0	0	0	0	0	0	0.00214018	0	0	0	0	0	0	0	0	0	0	0	0	0	0	0	0	6.21048e-07	0
Providencia	0	0	0	0	0	0	0	0	0	0	0	0	0	0	0	0	0	0	0	0	0	0	0	0	0	0	0	0	0	0	0	0	0	1.48723e-06	5.66653e-06	5.25783e-06	1.65094e-06	1.86314e-06	0
Pseudanabaena	0	0	0	0	0	0	0	0	0	0	0	0	0	0	0	0	0	0	0	0	0.000267523	0	0	0.000422119	0	0	0	0	0	0	0	0	0	0	0	0	0	0	0
Pseudoalteromonas	0	0	0	0	0	0	0	0	0	0	0	0	0	0	0	0	0	0	0	0	0	0	0	0	0	0	0	0	0	0	0	0	0	1.48723e-06	0	0	0	1.86314e-06	0
Pseudobutyrivibrio	0	0	0	0	0	0	0	0	0	0	0	0	0	0	0	0	0	0	0	0	0	0	0	0	0	0	0	0	0	0	0	0	0	1.48723e-06	0	1.05157e-06	2.20125e-06	0	0
Pseudomonas	0	0	0	0	0	0.000139831	0	0	0	0	0	0	0	0	0	0	0	0	0	0	0	0	0	0	0	0	0	0	0	0	0	0	0	0	0	0	0	0	0
Pseudoxanthomonas	0	0	0.000232072	0	0.000298954	0	0	0	0	0	0.0014771	0	0	0	0	0	0	0	0	0	0.000535045	0	0	0	0	0	0	0	1.39786e-05	0.00135855	0.0017925	0	0	0	0	0	0	0	0
Pullulanibacillus	0	0	0	0.000168549	0	0	0	0	0	0	0	0.000941176	0.0017234	0	0	0	0	0	0	0	0	0	0	0	0	0	0	0	0	0	0	0	0	7.43615e-07	0	0	0	0	0
Quadrisphaera	0	0	0	0.000168549	0	0	0	0	0	0.000825083	0	0	0	0	0	0	0	0	0	0	0	0	0	0	0	0	0	0	0	0	0	0	0	0	0	0	0	0	0
Ralstonia	0	0	0	0.000168549	0.000597907	0.000139831	4.10324e-05	0	0.000283849	0	0.000492368	0	0	0	0	0	0	0	0	0	0	0	0	0	0	0	0	0	5.59143e-05	0.000964513	0.000490256	0	0.000336092	7.43615e-07	1.41663e-06	2.10313e-06	1.65094e-06	6.21048e-07	0.0165155
Ramlibacter	0	0.0287635	0.0313298	0.0520816	0.0765321	0.18989	0.00882196	0.0154965	0.0156117	0.0338284	0.0265879	0.0357647	0.019819	0	0	0	0	0	0	0	0	0	0	0	0	0	0	0	1.39786e-05	0	0	0	0	0	0	0	0	0	0.0709177
Rathayibacter	0	0	0	0	0	0	0	0	0	0	0	0	0	0	0	0	0	0.000233754	0	0	0	0	0	0	0	0	0	0	0.000363443	5.88118e-06	0	0	0	0	0	0	0	0	0
RFN20	0	0	0	0	0	0	0	0	0	0	0	0	0	0	0	0	0	0	0	0	0	0	0	0	0	0	0	0	0	0	0	0	0	0	0	0.00419996	4.95282e-06	0.000261461	0
Rheinheimera	0	0.00336197	0.00556974	0.00455082	0.00597907	0.00258687	0.00118994	0.00459154	0.00397389	0.0107261	0.00689316	0.00941176	0.00775528	0	0	0	0	0	0	0	0	0	0	0	0	0	0	0	0	0	0	0	0	0	0	0	0	0	0.0249186
Rhizobium	0	0	0	0	0	6.99154e-05	0	0	0	0	0	0	0	0	0	0	0	0	0	0	0	0	0	0	0	0	0	0	0	0	0	0	0	0	0	0	0	0	0
Rhodobacter	0	0	0	0	0	0	0	0.000191314	0	0	0	0	0	0	0	0	0	0	0	0	0	0	0	0	0	0	0	0	1.39786e-05	0	0	0	2.29154e-05	0	0	0	0	0	0.0109037
Rhodococcus	0	0	0	0	0	0	0	0	0	0	0	0	0	0	0	0	0	0	0	0	0	0	0	0	0	0	0	0	0	0	0	0	0	0	7.08316e-07	0	0	0	0
Rhodocyclus	0	0	0.000464145	0	0	0	8.20647e-05	0	0	0	0	0	0	0	0	0	0	0	0	0	0	0	0	0	0	0	0	0	0	0	0	0	0	0	0	0	0	0	0
Rhodoferax	0	0	0.000232072	0.000505646	0	0.00160805	8.20647e-05	0.000191314	0.000283849	0.000412541	0	0	0.000861698	0	0	0	0	0	0	0	0	0	0	0	0	0	0	0	0	1.17624e-05	0	0	0	0	0	0	1.65094e-06	6.21048e-07	0.000697837
Roseburia	0	0	0.000464145	0	0	0	0	0	0	0	0	0	0	0	0	0	0	0	0	0	0	0	0	0	0	0	0	0	0	0	0	0	0	0.00257663	0.00164754	0.000719272	0.00392043	0.000206188	0
Roseomonas	0	0	0	0	0	0	0	0	0	0	0	0	0	0	0	0	0	0	0	0	0	0	0	0	0	0	0	0	0	0	0	0	0.000580523	0	0	0	0	0	0
Rothia	0	0	0.000232072	0.000168549	0	0	0	0	0.000851547	0	0.000492368	0	0	0	0	0	0.0130525	0.136512	0.131791	0.00815784	0.00187266	0.000382702	0.116175	0.00654285	0.00686556	0.00274348	0.0020429	0.00889428	0	0	0	0	0	5.2053e-06	5.66653e-06	5.99393e-05	5.50313e-06	0	0
Rubellimicrobium	0	0	0	0	0	0	0	0	0	0	0	0	0	0	0	0	0	0	0	0	0	0	0	0	0	0	0	0	0.000181722	0	0	0	0	0	0	0	0	6.21048e-07	0
Rubrobacter	0	0.000373552	0.000232072	0.000168549	0.000298954	0	4.10324e-05	0.000573943	0.00283849	0	0	0.000470588	0	0	0	0	0	0	0	0	0	0	0	0	0	0	0	0	0	0	0.00205295	0.000216123	0	0	0	1.05157e-06	0	3.72629e-06	0
Ruminobacter	0	0	0	0	0	0	0	0	0	0	0	0	0	0	0	0	0	0	0	0	0	0	0	0	0	0	0	0	0	0	0	0	0	1.18978e-05	2.12495e-06	0.0747096	9.35532e-06	1.3042e-05	0
Ruminococcus	0	0	0	0	0	0	0	0	0	0	0	0	0	0	0	0	0	0	0	0	0	0	0	0	0.00074897	0	0	0	0	0	0	0	0	0.00225687	0.00182391	0.00093274	0.00254795	0.000496218	0
Ruminococcus	0	0	0.00440938	0	0.000298954	0	4.10324e-05	0.000191314	0	0.000412541	0.000492368	0.000470588	0	0	0	0	0	0	0	0	0	0	0.00017135	0	0	0	0	0	0	0	0	0	0	0.0571654	0.0216029	0.0102728	0.0164511	0.0598939	2.90765e-05
Rummeliibacillus	0	0.000373552	0.000464145	0.000842744	0.000298954	0	0	0.00153051	0.00369004	0.00165017	0.000984737	0.000941176	0.00129255	0	0	0	0	0	0	0	0	0	0	0	0	0	0	0	0	0	0	0	0	1.18978e-05	2.12495e-06	0	0	0.000109304	0
Saccharothrixopsis	0	0	0	0	0	0	0	0	0	0	0	0	0	0	0	0	0	0	0	0	0	0	0	0	0	0	0	0	0	5.88118e-06	0	0	0	0	0	0	0	0	0
Salimicrobium	0	0	0	0	0	0	0	0	0	0	0	0	0	0	0	0	0	0	0	0	0	0	0	0	0	0	0	0	0	0	0	0	0	0	7.08316e-07	0	0	0	0
Salinicoccus	0	0	0	0	0	0	0	0	0	0	0	0	0	0	0	0	0	0	0	0	0	0	0	0	0	0	0	0	0	0.000123505	0	0	1.52769e-05	7.43615e-07	7.08316e-07	0	5.50313e-07	0	0
Salinisphaera	0	0	0	0	0	0	0	0	0	0	0	0	0	0	0	0	0	0	0	0	0	0	0	0	0	0	0	0	0.000251615	0	0	0	0	0	0	0	0	0	0
Salinispora	0	0	0	0	0	0	0	0	0	0	0	0	0	0	0	0	0	0	0	0	0	0	0	0	0	0	0	0	0	0	0	0	0	0	0	4.41658e-05	0	0	0
Salinivibrio	0	0	0	0	0	0	0	0	0	0	0	0	0	0	0	0	0	0	0	0	0	0	0	0	0	0	0	0	0	0	0	0	0	7.43615e-07	0	0	5.50313e-07	2.48419e-06	0
Salmonella	0	0	0	0	0	0	0	0	0	0	0	0	0	0	0	0	0	0	0	0	0	0	0	0	0	0	0	0	0	0	0	0	0	1.48723e-06	0	0	5.50313e-06	0	0
Sanguibacter	0	0	0	0	0	0	0	0	0	0	0	0	0	0	0	0	0	0	0	0	0	0	0	0	0	0	0	0	0	0	0	0.000540307	0	0	0	0	0	0	0
Sarcina	0	0	0	0	0	0	0	0	0	0	0	0	0	0	0	0	0	0	0	0	0	0	0	0	0	0	0	0	0	0	0	0	0	1.18978e-05	1.62913e-05	0.0489399	0.000138679	3.16735e-05	0
Scardovia	0	0	0	0	0	0	0	0	0	0	0	0	0	0	0	0	0	0	0	0	0	0	0	0	0	0.000195963	0	0.000202143	0	0	0	0	0	0	0	3.1547e-06	1.65094e-06	6.21048e-07	0
Schwartzia	0	0	0	0	0	0	0	0	0	0	0	0	0	0	0	0	0	0	0	0.000948587	0.0104334	0.000191351	0	0.00021106	0	0	0.000170242	0.00464928	0	0	0	0	0	0	0	0	0	0	0
Sediminibacterium	0	0.000373552	0	0	0	6.99154e-05	0.000123097	0.000382629	0	0.000825083	0	0.00188235	0	0	0	0	0	0	0	0	0	0	0	0	0	0	0	0	0	0	0	0	0	0	0	0	0	0	0
Segetibacter	0	0	0	0.000168549	0	0	0	0	0	0	0	0	0	0	0	0	0	0	0	0	0	0	0	0	0	0	0	0	0	1.17624e-05	0	0	0	0	0	0	0	0	0
Selenomonas	0	0	0	0	0	0	0	0	0	0	0	0	0	0	0	0	0.0588846	0.000116877	0	0.0417378	0.0254147	0.010333	0.000685401	0.00401013	0	0.00274348	0.0473272	0.00707499	0	0	0	0	0	2.00776e-05	9.20811e-06	5.25783e-06	2.20125e-06	0	0
Serinicoccus	0	0.000373552	0	0	0	0	0	0	0	0	0.000984737	0	0	0	0	0	0	0	0	0	0	0	0	0	0	0	0	0	0	0	0	0	0	0	0	0	0	0	0
Serratia	0	0	0	0	0	0	0	0	0	0	0	0	0	0	0	0	0	0	0	0	0	0	0	0	0	0	0	0	0	0	0	0	0	6.84126e-05	2.54994e-05	7.36097e-06	1.59591e-05	0.000537828	0
Sharpea	0	0	0	0	0	0	0	0	0	0	0	0	0	0	0	0	0	0	0	0	0	0	0	0	0	0	0	0	0	0	0	0	0	0	1.06247e-05	2.10313e-06	1.10063e-06	0	0
Shewanella	0	0	0	0.000168549	0	0.000349577	0	0	0	0	0	0	0	0	0	0	0	0	0	0	0	0	0	0	0	0	0	0	0	0	0	0	3.05538e-05	0	0	0	0	0	0
Shinella	0	0	0	0	0	0	0	0	0	0	0	0	0	0	0	0	0	0	0	0	0	0	0	0	0	0	0	0	2.79572e-05	0	0	0.000108061	0	0	0	0	0	0	0
Shuttleworthia	0	0	0	0	0	0	0	0	0	0	0	0	0	0	0	0	0	0.000116877	0	0	0	0	0	0	0	0.000391926	0.000170242	0.000202143	0	0	0	0	0	7.43615e-07	0	1.05157e-06	3.85219e-06	0	0
Sinomonas	0	0	0	0	0	0	0	0	0	0	0	0	0	0	0	0	0	0	0	0	0	0	0	0	0	0	0	0	0.000237636	0	0	0	0	0	0	0	0	0	0
Sinorhizobium	0	0	0	0	0	0	0	0	0	0	0	0	0	0	0	0	0	0	0	0	0	0	0	0	0	0	0	0	0.000125807	0	0	0	0	0	0	0	0	0	0
Slackia	0	0	0	0	0	0	0	0	0	0	0	0	0	0	0	0	0	0	0	0	0	0	0	0	0	0	0	0	0	0	0	0	0	0.000725025	0.000221703	4.94236e-05	2.91666e-05	4.28523e-05	0
SMB53	0	0.0130743	0.0754235	0.00640485	0.02571	0.000838985	0.00069755	0.00554812	0.00738007	0.019802	0.0152634	0.0141176	0.0206807	0	0	0	0	0	0	0	0	0	0	0	0	0	0	0	0	0	0	0	0	0.00449961	0.000453322	0.00310633	0.00805438	0.00193208	0.0231449
Sneathia	0	0	0	0	0	0	0	0	0	0	0	0	0	0	0	0	0	0	0	0	0	0	0	0	0	0	0	0	0	0	0	0	0	0	3.54158e-05	0.000307057	1.81603e-05	1.86314e-06	0
Sodalis	0	0	0	0	0	0	0	0	0	0	0	0	0	0	0	0	0	0	0	0	0	0	0	0	0	0	0	0	0	0	0	0	0	1.48723e-06	0	0	5.50313e-07	6.21048e-06	0
Solibacillus	0	0.000373552	0	0	0	0	0	0.0013392	0.000283849	0.000825083	0.00344658	0.000941176	0.000430849	0	0	0	0	0	0	0	0	0	0	0	0	0	0	0	0	1.17624e-05	3.0641e-05	0	0	0	0	0	0	1.2421e-06	5.81531e-05
Solirubrobacter	0	0	0	0	0	0	0	0	0	0	0	0	0	0	0	0	0	0	0	0	0	0	0	0	0	0	0	0	0.000349465	2.94059e-05	0.000965192	0	0.000336092	0	0	0	0	0	2.90765e-05
Solwaraspora	0	0	0	0	0	0	0	0	0	0	0	0	0	0	0	0	0	0	0	0	0	0	0	0	0	0	0	0	0	0	0.000245128	0	0	0	0	0	0	0	0
Sorangium	0	0.000747105	0.000696217	0	0.000298954	6.99154e-05	0	0.000382629	0.000851547	0	0	0.000941176	0.00861698	0	0	0	0	0	0	0	0	0	0	0	0	0	0	0	0.000712908	0	0	0	0	0	0	0	0	0	2.90765e-05
Sphaerisporangium	0	0	0	0	0	0	0	0.000573943	0	0.000412541	0	0	0	0	0	0	0	0	0	0	0	0	0	0	0	0	0	0	1.39786e-05	0	0	0	0	0	0	0	0	0	0
Sphaerochaeta	0	0	0	0	0	0	0	0	0	0	0	0	0	0	0	0	0	0	0	0	0	0	0	0	0	0	0	0	0	0	0	0	0	1.48723e-06	1.41663e-06	3.1547e-06	0	0	0
Sphingobacterium	0	0	0	0	0	0	0	0	0	0	0	0	0	0	0	0	0	0	0	0	0	0	0	0	0	0	0	0	0	0	0	0	0	0	0	0	5.50313e-07	6.21048e-07	0
Sphingopyxis	0	0.000747105	0.000232072	0.000168549	0.000298954	0	0.000328259	0.000382629	0	0	0.0014771	0.00235294	0	0	0	0	0	0	0	0	0	0	0	0	0	0	0	0	0	0	0	0	0	0	0	0	0	0	2.90765e-05
Spirillospora	0	0	0	0	0	0	0	0	0	0	0	0	0	0	0	0	0	0	0	0	0	0	0	0	0	0	0	0	1.39786e-05	0	9.1923e-05	0	0	0	0	0	0	0	0
Sporichthya	0	0	0	0	0	0	0	0	0	0	0	0	0	0	0	0	0	0	0	0	0	0	0	0	0	0	0	0	0.000265593	0	0	0	0	0	0	0	0	0	0
Sporolactobacillus	0	0	0	0	0	0	0	0	0	0	0	0	0	0	0	0	0	0	0	0	0	0	0	0	0	0	0	0	0	0	0	0	0	0	1.41663e-06	1.05157e-06	0	6.21048e-07	0
Sporomusa	0	0	0	0	0	0	0	0	0	0	0	0	0	0	0	0	0	0	0	0	0	0	0	0	0	0.000195963	0	0	0	0	0	0	0	0	0	0	5.50313e-07	0	0
Sporosarcina	0	0.00149421	0.00394523	0.00741615	0.00119581	0	0.000205162	0.00363497	0.00312234	0.0136139	0.00590842	0.00941176	0.00818613	0	0	0	0	0	0	0	0	0	0	0	0	0	0	0	0.000125807	0	7.66025e-05	0	7.63846e-06	0	0	0	0	0	0.00863573
Streptacidiphilus	0	0	0	0	0	0	0	0	0	0	0	0	0	0	0	0	0	0	0	0	0	0	0	0	0	0	0	0	4.19358e-05	0	1.53205e-05	0	2.29154e-05	0	0	0	0	0	0
Streptococcus	0	0.00410908	0.00278487	0.00168549	0.00239163	0.000209746	0.000205162	0.00114789	0.00340619	0.00371287	0.00246184	0.008	0.00646273	0	0	0	0.0848413	0.484572	0.332596	0.043635	0.0104334	0.106965	0.32745	0.0445336	0.104856	0.108564	0.136023	0.131797	0	0.000264653	0.00263513	0	0.00135965	0.00610582	0.0544334	0.00105577	0.00361556	0.000101852	0.0250058
Streptosporangium	0	0.00224131	0.000232072	0	0	0	0	0.000191314	0	0	0	0.000470588	0	0	0	0	0	0	0	0	0	0	0	0	0	0	0	0	0	0	0	0	0	0	0	0	0	0	0
Succinivibrio	0	0	0	0	0	0	0	0	0	0	0	0	0	0	0	0	0	0	0	0	0	0	0	0	0	0	0	0	0	0	0	0	0	0.00209476	0.00036195	0.0450281	0.000983409	0.0676955	0
Sulfurimonas	0	0	0	0	0	0	0	0	0	0	0	0	0	0	0	0	0	0.000116877	0.000201207	0.000189717	0	0	0	0.000422119	0.000124828	0	0	0	0	0	0	0	0	0	0	0	0	0	0
Sutterella	0	0	0	0	0	0	0	0	0	0.000412541	0	0	0	0.00199667	0.000300869	0	0	0	0	0	0	0	0	0	0	0	0	0	0	0	0	0	0	5.94892e-06	0.00643151	0.00383822	0.0117398	0.00251587	0
Symbiobacterium	0	0	0	0	0	0	0	0	0	0	0	0	0	0	0	0	0	0	0	0	0	0	0	0	0	0	0	0	0	0	0	0	0	0	0	0	0	6.21048e-07	0
Synechococcus	0	0	0	0	0	0	0	0	0	0	0	0	0	0	0	0	0	0	0	0	0	0	0	0	0	0	0	0	0	0	1.53205e-05	0	0	0	0	0	0	0	0
Synergistes	0	0	0	0	0	0	0	0	0	0	0	0	0	0	0	0	0	0	0	0	0	0	0	0	0	0	0	0	0	0	0	0	0	0	0	0	2.20125e-06	0	0
Syntrophobacter	0	0	0	0	0	0	0	0	0	0	0	0	0	0	0	0	0	0	0	0	0	0	0	0	0	0	0	0	0	0	0	0	0	0	0	0	5.50313e-07	0	0
Syntrophococcus	0	0	0	0	0	0	0	0	0	0	0	0	0	0	0	0	0	0	0	0	0	0	0	0	0	0	0	0.000202143	0	0	0	0	0	0	0	0	0	0	0
Syntrophomonas	0	0	0	0	0	0	0	0	0	0	0	0	0	0	0	0	0	0	0	0	0	0	0	0	0	0	0	0	0	0	0	0	0	0	0	0	5.50313e-07	6.21048e-07	0
Tannerella	0	0	0	0	0	0	0	0	0	0	0	0	0	0	0	0	0.0198754	0	0.000201207	0.00815784	0.0227394	0.000191351	0	0.00907556	0	0.000195963	0	0.000404285	0	0	0	0	0	0	0	0	0	0	0
Telluria	0	0	0	0	0	0	0.000246194	0	0	0	0	0	0	0	0	0	0	0	0	0	0	0	0	0	0	0	0	0	0	0	0	0	0	0	0	0	0	0	0
Tepidimicrobium	0	0	0	0	0	0	0	0	0	0	0	0	0	0	0	0	0	0	0	0.000569152	0	0	0	0.000844238	0.000124828	0	0	0.000202143	0	0	0	0	0	0	0	0	0	0	0
Tepidimonas	0	0	0	0	0	0.000139831	0	0	0	0	0.000492368	0	0	0	0	0	0	0	0	0	0	0	0	0	0	0	0	0	1.39786e-05	0.00248186	0.00326327	0.000216123	0	0	0	0	0	0	2.90765e-05
Terracoccus	0	0	0	0	0	0	0	0	0	0	0	0	0	0	0	0	0	0	0	0	0	0	0	0	0	0	0	0	0	0	9.1923e-05	0	0	0	0	0	0	0	2.90765e-05
Tessaracoccus	0	0	0	0	0	0	0	0	0	0	0	0	0	0	0	0	0	0	0	0.000189717	0	0	0	0	0	0	0	0	0	0	0	0	0	0	0	0	0	0	0
Tetragenococcus	0	0	0	0	0	0	0	0	0	0	0	0	0	0	0	0	0	0	0	0	0	0	0	0	0	0	0	0	0	0	0	0	0	0	0	0	0	3.72629e-06	0
Tetrasphaera	0	0.000373552	0	0	0	0	0	0.000191314	0	0	0	0	0	0	0	0	0	0	0	0	0	0	0	0	0	0	0	0	0	0	0	0	0	0	0	0	0	0	5.81531e-05
TG5	0	0	0	0	0	0	0	0	0	0	0	0	0	0	0	0	0	0	0	0.00208689	0.0302301	0	0	0.0154073	0	0	0	0	0	0	0	0	0	0	0	0	0	0	0
Thalassobacillus	0	0	0	0	0	0	0	0	0	0	0	0	0	0	0	0	0	0	0	0	0	0	0	0	0	0	0	0	0	0	0	0	0	0	0	0	0	6.21048e-07	0
Thauera	0	0	0	0	0	0	0	0	0	0	0	0	0	0	0	0	0	0	0	0	0	0	0	0	0	0	0	0	0	0	0	0	0	0	0	0	5.50313e-07	7.45258e-06	0
Thermicanus	0	0	0	0	0	0	0	0	0	0	0	0	0	0	0	0	0	0	0	0	0	0	0	0	0	0	0	0	0	0.000282296	0	0	0	0	0	0	0	0	0
Thermoactinomyces	0	0	0	0	0	0	0	0	0	0	0	0	0	0	0	0	0	0	0	0	0	0	0	0	0	0	0	0	0	5.29306e-05	0	0	0	0	0	0	0	0	0
Thermoflavimicrobium	0	0	0	0	0	0	0	0	0	0	0	0	0	0	0	0	0	0	0	0	0	0	0	0	0	0	0	0	0	0	0.000199167	0	0	0	0	0	0	0	0
Thermus	0	0	0	0	0	0.000139831	0	0	0	0	0	0	0	0	0	0	0	0	0	0	0	0	0	0	0	0	0	0	0	0	0	0	0	0	0	0	0	0	0
Thiomonas	0	0	0	0	0	0	0	0	0	0	0	0	0	0	0	0	0	0	0	0	0	0	0	0	0	0	0	0	0	0	0	0	0	0	7.08316e-07	0	5.50313e-07	6.21048e-07	0
Thiothrix	0	0	0	0	0	0	0	0	0	0	0	0	0	0	0	0	0	0	0	0	0	0	0	0	0.00374485	0	0	0	0	0	0	0	0	1.48723e-06	0	0	0	6.21048e-06	0
Tolumonas	0	0	0	0	0	0	0	0	0	0	0	0	0	0	0	0	0	0	0	0	0	0	0	0	0	0	0	0	0	0	0	0	0	0	0	2.10313e-06	0	3.10524e-06	0
Trabulsiella	0	0	0	0	0	0	0	0	0	0	0	0	0	0	0	0	0	0	0	0	0	0	0	0	0	0	0	0	0	5.88118e-06	0	0	7.63846e-06	1.48723e-06	7.08316e-07	9.4641e-06	3.24685e-05	0	0
Treponema	0	0.000747105	0.0092829	0.000168549	0	0	8.20647e-05	0	0.000283849	0	0	0	0	0	0	0	0.00207654	0	0	0.0404098	0.103264	0	0.0106237	0.117771	0.00224691	0.000587889	0.00102145	0.004245	0	4.70494e-05	0	0	0	7.43615e-07	2.9041e-05	0.026673	4.84275e-05	2.48419e-06	0
Trichococcus	0	0	0	0	0	0	0	0	0	0	0	0	0.00129255	0	0	0	0	0	0	0	0	0	0	0	0	0	0.000170242	0	0	0	0	0	0	1.48723e-06	7.08316e-07	0	1.10063e-06	1.49052e-05	0
Trigonala	0	0	0	0	0	0	0	0	0	0	0	0	0	0	0	0	0	0	0	0	0	0	0	0	0	0	0	0	0	9.40988e-05	4.59615e-05	0	0	0	0	0	0	0	0
Turicibacter	0	0.000747105	0.00812253	0.000337098	0.000597907	6.99154e-05	4.10324e-05	0.000382629	0	0	0	0.00141176	0.00129255	0	0	0	0	0	0	0	0	0	0	0	0	0	0	0	0	0	0	0	0	0	7.08316e-07	8.09706e-05	0.0014011	1.2421e-05	5.81531e-05
Unclassified	0	0	0	0	0	0	0	0	0	0	0	0	0	0	0	0	0	0	0	0	0	0	0	0	0	0	0	0	0	0	0	0.000108061	0	0	0	0	0	0	0
Unclassified	0	0	0	0	0	0	0	0	0	0	0	0	0	0	0	0	0	0	0	0	0	0	0	0	0	0	0	0	0	5.88118e-05	0	0.000216123	7.63846e-06	0	0	0	0	0	0
Unclassified	0	0	0	0	0	0	0	0	0.000283849	0	0	0	0	0	0	0	0	0	0	0	0	0	0	0	0	0	0	0	0	0	0	0	0	0	0	0	0	0	0
Unclassified	0	0	0	0	0	0	0	0	0	0	0	0	0	0	0	0	0	0	0	0	0	0	0	0	0	0	0	0	0.000726886	0.00079984	0	0.000324184	0.0338766	0	0	0	0	0	2.90765e-05
Unclassified	0	0	0	0	0	0	0	0	0	0	0	0	0	0	0	0	0	0	0	0	0	0	0	0	0	0	0	0	0.000307529	3.52871e-05	0.00441231	0.00075643	0.00114577	0	0	0	0	0	0
Unclassified	0	0	0	0	0	0	0	0	0	0	0	0	0	0	0	0	0	0	0	0	0	0	0	0	0	0	0	0	1.39786e-05	0	0	0	0	0	0	0	0	0	0
Unclassified	0	0.000373552	0	0	0	0	0	0	0	0	0	0	0.000430849	0	0	0	0	0	0	0	0	0	0	0	0	0	0	0	0	0	0	0	0	0	0	0	0	0	0
Unclassified	0	0.00261487	0.000464145	0.000168549	0.000597907	6.99154e-05	0.0013951	0.00172183	0.00454158	0.00206271	0.00295421	0.00188235	0.000430849	0	0	0	0	0	0	0	0	0	0	0	0	0	0	0	0.00099248	0.00287001	0.000643461	0.000540307	0.00190198	0	0	0	0	0	2.90765e-05
Unclassified	0	0	0	0	0.000298954	0	4.10324e-05	0.0026784	0.000283849	0.000412541	0.0014771	0.000470588	0.000430849	0	0	0	0	0	0	0	0	0	0	0	0	0	0	0	0	0	0	0.000108061	0	0	0	0	0	0	0
Unclassified	0	0	0	0	0	0	0	0	0	0	0	0	0	0	0	0	0	0	0	0	0	0	0	0	0	0	0	0	0.000111829	7.05741e-05	0	0.000108061	0	0	0	0	0	0	0
Unclassified	0	0.000747105	0	0	0.000298954	6.99154e-05	4.10324e-05	0.000765257	0.000851547	0.00206271	0.000492368	0.00282353	0	0	0	0	0.000148324	0	0	0.000189717	0.000267523	0	0	0	0	0	0.000170242	0	0.000167743	0.00125857	0	0	0.000106938	0	0	0	0	0	5.81531e-05
Unclassified	0	0	0	0	0	0	0	0	0	0	0	0	0	0	0	0	0	0	0	0	0	0	0	0	0.000124828	0	0	0	0	0	0	0	0	0	0	0	0	0	0
Unclassified	0	0	0	0	0	0	0	0	0	0.000412541	0	0	0	0	0	0	0	0	0	0	0	0	0	0	0	0	0	0	0	0	0	0	0	0	0	0	0	0	0
Unclassified	0	0.0104595	0.000696217	0.000674195	0.000597907	6.99154e-05	4.10324e-05	0.00440023	0.00141924	0.00536304	0.009355	0.00188235	0.000430849	0	0	0	0	0	0	0	0	0	0	0	0	0	0	0	0	0	0	0	1.52769e-05	0	0	0	0	0	2.90765e-05
Unclassified	0	0.0115801	0.000464145	0	0.00119581	6.99154e-05	4.10324e-05	0.00229577	0.00510928	0.00165017	0.0014771	0.000470588	0	0	0	0	0	0	0	0	0	0	0	0	0	0	0	0	0	0	0	0	0.000160408	0	0	0	0	0	2.90765e-05
Unclassified	0	0	0	0.000168549	0	0	0	0	0	0	0	0	0	0	0	0	0	0	0	0	0	0	0	0	0	0	0	0	0	0	0	0	0	0	0	0	0	0	0
Unclassified	0	0.000373552	0	0	0.000298954	0	0	0.000191314	0.00141924	0.000412541	0	0.000941176	0	0	0	0	0	0	0	0	0	0	0	0	0	0	0	0	2.79572e-05	0.000217604	0	0	0	0	0	0	0	0	0
Unclassified	0	0.000747105	0	0.000168549	0	0	4.10324e-05	0	0	0.000825083	0	0	0.000430849	0	0	0	0	0	0	0	0	0	0	0	0	0	0	0	0	0	0	0	0	0	0	0	0	0	0
Unclassified	0	0	0	0	0	0	0	0	0	0	0	0	0	0	1.76982e-05	0	0	0	0	0	0	0	0	0	0	0	0	0	0	0.000229366	0	0	0	0	0	0	0	0	0
Unclassified	0	0	0	0	0	0	0	0.00114789	0.000283849	0	0.000492368	0	0	0	0	0	0	0	0	0	0	0	0	0	0	0	0	0	5.59143e-05	0	0	0	0	0	0	0	0	0	5.81531e-05
Unclassified	0	0	0	0	0	0	4.10324e-05	0	0.000283849	0.000412541	0	0	0	0.000998336	0	0	0	0	0	0	0	0	0	0	0	0	0	0	0	5.88118e-06	0	0	0	0	0	0	0	0	0
Unclassified	0	0.000373552	0	0	0	0	0	0.000956572	0	0.00206271	0.000492368	0	0	0	0	0	0	0	0	0	0	0	0	0	0	0	0	0	0.000321507	0.0015938	0	0	0	0	0	0	0	0	0
Unclassified	0	0	0	0	0	0	0	0.000191314	0	0.000412541	0.000492368	0	0	0	0	0	0	0	0	0	0	0	0	0	0	0	0	0	0.000237636	0	0	0	0	0	0	0	0	0	0
Unclassified	0	0	0	0	0	0	0	0	0	0	0	0	0.000430849	0	0	0	0	0	0	0	0	0	0	0	0	0	0	0	0	0	0	0	0	0	0	0	0	0	0
Unclassified	0	0	0	0	0	0	0	0	0	0	0	0	0	0	0	0	0	0	0	0.000379435	0	0	0	0.00021106	0	0	0	0	0	0	0	0	0	0	0	0	0	0	0
Unclassified	0	0	0	0	0	0	0	0	0	0	0	0	0	0	0	0	0	0	0	0	0	0	0	0	0	0	0	0.000202143	0	0	0	0	0	0	0	0	0	0	0
Unclassified	0	0.000747105	0.0025528	0.000505646	0.000298954	0	0.000287227	0.000573943	0.00198694	0.00123762	0.000492368	0.000470588	0.0017234	0	0	0	0.000444972	0	0.000402414	0.000189717	0	0.000574053	0.000514051	0	0.000249657	0	0	0.000202143	0.000405379	7.64553e-05	1.53205e-05	0	2.29154e-05	0	0	0	0	6.21048e-07	0.000436148
Unclassified	0	0	0	0	0	0	0	0	0	0	0	0	0	0	0	0	0	0.000116877	0.000201207	0.0115728	0	0.00267891	0.0010281	0.00232165	0	0.000195963	0	0	0	0	0	0	0	0	0	6.3094e-06	5.50313e-07	1.2421e-06	0
Unclassified	0	0	0	0	0	0	0	0	0	0	0	0	0	0	0	0	0	0	0	0	0	0	0	0	0	0	0	0	0.000209679	0.00202901	0	0.000324184	0.0023832	0	0	0	0	0	0.00159921
Unclassified	0	0.000373552	0	0	0	0	0	0	0	0	0	0	0	0	0	0	0	0	0	0	0	0	0	0	0	0	0	0	0	0	0	0	0	0	0	0	0	0	0
Unclassified	0	0	0	0	0	0	0	0	0.000283849	0	0	0.000470588	0	0	0	0	0	0	0	0	0	0	0	0	0	0	0	0	0.000111829	0	0	0	0	0	0	0	0	0	0
Unclassified	0	0	0	0	0	6.99154e-05	0.000328259	0.000765257	0.000567698	0	0.000492368	0	0	0	0	0	0	0	0	0	0	0	0	0	0	0	0	0	5.59143e-05	0	0	0	0	0	0	0	0	6.21048e-07	0
Unclassified	0	0	0	0	0	0	0	0	0	0	0	0.000470588	0	0	0	0	0	0	0	0	0	0	0	0	0	0	0	0	9.78501e-05	0	0	0	0	0	0	0	0	6.21048e-07	0
Unclassified	0	0	0	0	0	0	0	0	0	0	0	0	0	0	0	0	0	0	0	0	0	0	0	0.000633179	0	0	0	0	0	0	0	0	0	0	0	0	0	0	0
Unclassified	0	0	0	0.000168549	0	0	4.10324e-05	0	0.000283849	0	0	0.000470588	0	0	0	0	0	0	0	0	0	0	0	0	0	0	0	0	0	0	0.00122564	0	0	0	0	0	0	0	0.00107583
Unclassified	0	0	0	0	0	0	0	0	0	0	0	0	0	0	0	0	0	0	0	0	0	0.000191351	0	0	0	0	0	0	0	0	0	0	0	0	0	0	0	0	0
Unclassified	0	0.000373552	0.0025528	0.000674195	0.000896861	0	4.10324e-05	0.00325234	0.000283849	0.000825083	0.0014771	0	0.000430849	0	0	0	0	0	0	0.000569152	0	0	0	0	0	0	0	0	6.98929e-05	0	0	0.000108061	0	0	0	0	0	0	2.90765e-05
Unclassified	0	0	0.00116036	0.00219113	0	0	0.000164129	0.000382629	0.000283849	0.000412541	0	0.000470588	0	0	0	0	0.000148324	0.00292193	0.00160966	0.000189717	0	0	0	0.00021106	0.000124828	0	0.000340483	0.000202143	0.00138388	0.000323465	1.53205e-05	0	0	7.43615e-07	7.08316e-07	3.1547e-06	3.30188e-06	6.21048e-07	0.0400384
Unclassified	0	0	0	0.000168549	0	0	0	0.000191314	0.000567698	0	0	0	0	0	0	0	0	0	0	0	0	0	0	0	0	0	0	0	0	0	0	0	0	0	0	0	0	0	0
Unclassified	0	0	0	0	0	0	0	0	0	0	0	0	0	0	0	0	0.000296648	0	0.00181087	0.0144185	0.00294275	0.000191351	0.0023989	0.00485437	0	0	0	0.000404285	0	0	0	0	0	0	0	0	0	0	0
Unclassified	0	0.000747105	0	0.000842744	0.000298954	6.99154e-05	8.20647e-05	0.000191314	0.0011354	0.000825083	0	0.000470588	0	0	0	0	0	0	0	0	0	0	0	0	0	0	0	0	0.00048925	0.00182905	0.00107244	0	0.00311649	0	0	0	0	0	0.00133752
Unclassified	0	0	0	0	0	0	0	0.000191314	0	0	0	0	0	0	0	0	0	0	0	0	0	0	0	0	0	0	0	0	0	0	0	0	0	0	0	0	0	0	0
Unclassified	0	0	0	0	0	0	0	0	0	0	0	0	0	0	0	0	0	0	0	0	0	0	0	0	0	0	0	0	0.000559143	2.35247e-05	7.66025e-05	0	7.63846e-06	0	0	0	0	0	0
Unclassified	0	0	0	0	0	0	0	0	0	0	0	0	0	0	0	0	0	0	0	0	0	0	0	0	0	0	0	0	0	0	0	0	0	0	1.41663e-06	0	5.50313e-07	1.86314e-06	0
Unclassified	0	0	0	0	0	0	0	0	0	0	0	0	0	0	0	0	0.000148324	0	0	0.000189717	0	0	0	0	0	0	0	0	0.000461293	0.00192314	0	0	0	0	0	0	0	0	2.90765e-05
Unclassified	0	0	0	0	0	0	0	0	0	0	0	0	0	0	0	0	0	0	0	0.000569152	0.00107009	0	0	0	0	0.000391926	0.000851209	0	0	0	0	0	0	0.00338865	0.00108443	0.00169828	0.00110778	0.00870089	0
Unclassified	0	0	0	0	0	0	0	0	0	0	0	0	0	0	0	0	0.000593296	0.000233754	0.000402414	0.000189717	0	0.000191351	0	0.00021106	0.000124828	0	0.000170242	0.000202143	0	0	0	0	0	0	0	0	0	0	0
Unclassified	0	0	0	0	0	0	0	0	0	0	0	0	0	0	0	0	0	0	0	0	0	0	0	0	0	0	0	0	0.000461293	0	0.000367692	0	1.52769e-05	0	0	0	0	0	5.81531e-05
Unclassified	0	0	0	0	0	0	0	0	0	0	0	0	0	0	0	0	0	0	0	0	0	0	0	0	0.000124828	0	0	0	0.00225055	0.000141148	0.00379949	0.00108061	0.00304774	0	0	0	0	0	2.90765e-05
Unclassified	0	0	0.000464145	0.000168549	0.000298954	0	4.10324e-05	0.000956572	0	0.00165017	0	0.000470588	0.000430849	0	0	0	0	0	0	0	0	0	0	0	0	0	0	0	0.00125807	0.000176435	0.00727724	0.000432246	0.00126798	0	0	0	0	0	0.000116306
Unclassified	0	0	0.000232072	0.000168549	0	0	0	0.000573943	0	0	0.000492368	0	0	0	0	0	0	0	0	0	0	0	0	0	0	0	0	0	0	0	0	0	0	0	0	0	0	0	0
Unclassified	0	0	0	0	0.000298954	0	0	0.000191314	0	0.000412541	0	0	0	0	0	0	0	0	0	0	0	0	0	0	0	0	0	0	0	0	0	0	0	0	0	0	0	0	0
Unclassified	0	0	0	0	0	0	0	0	0	0	0	0	0	0	0	0	0	0	0	0	0	0	0	0	0	0	0	0	0	0	0	0	0	0	0	1.05157e-06	0	1.86314e-06	0
Unclassified	0	0	0	0	0	0	0	0	0	0	0	0	0	0	0	0	0	0	0	0	0	0	0	0.000422119	0	0	0	0	0	0	0	0	0	0	0	0	0	0	0
Unclassified	0	0	0	0	0	6.99154e-05	0	0	0	0	0	0	0	0	0	0	0	0	0	0	0	0	0	0	0	0	0	0	0	0	0	0	0	0	0	0	0	0	0
Unclassified	0	0	0	0	0	0	0	0	0	0	0	0	0	0	0	0	0.000148324	0.000116877	0	0.00303548	0.0136437	0	0.00017135	0.00970874	0.000624142	0.000195963	0	0.00101071	0	4.11682e-05	0	0	0	7.43615e-06	0.0164436	0.0155832	0.00215888	0.038782	0
Unclassified	0	0	0	0	0	0	0	0	0	0	0	0	0	0	0	0	0	0	0	0	0	0	0	0	0	0	0	0	0	0	0	0	0	0	0	0	0	6.21048e-07	0
Unclassified	0	0.000373552	0.0025528	0	0	0	0.000123097	0	0.000567698	0.000825083	0	0	0	0	0	0	0	0	0	0	0	0	0	0	0	0	0	0	0	0	0	0	0	0	7.08316e-07	1.05157e-06	5.50313e-07	3.10524e-06	0
Unclassified	0	0	0	0	0	0	0	0	0	0	0	0	0	0	0	0	0	0	0	0	0	0	0	0	0.000124828	0	0	0	0	0	0	0	0	0	0	1.05157e-06	0	0	0
Unclassified	0	0	0	0	0	0	0	0	0	0	0	0	0	0	0	0	0	0	0	0	0	0	0	0	0	0	0	0	0	0	0	0	0	0.000446169	0.00047953	0.000715065	3.85219e-06	0.000761405	0
Unclassified	0	0	0.00556974	0.000337098	0	0	8.20647e-05	0	0.000283849	0.000825083	0	0.000941176	0.000861698	0	0	0	0	0	0	0	0	0	0	0	0	0	0	0	0	0	0	0.000108061	0	0	1.41663e-06	0	4.95282e-06	1.2421e-06	5.81531e-05
Unclassified	0	0	0.000232072	0	0	0	0	0	0	0	0	0	0	0	0	0	0	0	0	0	0	0	0	0	0	0	0.000340483	0	0	0	0	0	0	0	5.45403e-05	3.68048e-05	0.00026415	0.000540312	0
Unclassified	0	0	0.00324901	0	0.000597907	0.000139831	8.20647e-05	0.000191314	0	0.000825083	0	0.000941176	0	0	0	0	0.000296648	0	0	0.000189717	0.000802568	0	0	0.000633179	0	0	0.000170242	0.000202143	0	0	0	0	0	0.000353217	0.00440006	0.00582989	0.00247696	0.0142319	0
Unclassified	0	0	0	0	0	0	0	0	0	0	0	0	0	0	0	0	0	0	0	0	0	0	0	0	0	0	0	0	0	0	0	0	0	0	7.08316e-07	1.05157e-06	1.70597e-05	0	0
Unclassified	0	0	0	0	0	0	0	0	0	0	0	0	0	0	0	0	0	0	0	0	0	0	0	0	0	0	0	0	0	0	0	0	0	0.00582251	0.00125159	8.41253e-05	4.4025e-06	0.0217572	0
Unclassified	0	0	0.00324901	0.000168549	0	0	4.10324e-05	0.000191314	0	0	0	0	0	0	0	0	0	0	0	0	0	0	0	0	0	0	0	0	0	0	0	0	0	0	0	0	0	0	0
Unclassified	0	0	0	0	0	0	0	0	0	0	0	0	0	0	0	0	0	0	0	0	0	0	0	0	0.000124828	0	0	0	0	0	0	0	0	0	0	0	0	0	0
Unclassified	0	0	0	0	0	0	0	0	0	0	0	0	0	0	0	0	0	0	0	0	0	0	0	0	0	0	0	0	0	0	0	0	0	0	0	0	5.50313e-07	1.2421e-06	0
Unclassified	0	0.000373552	0.000464145	0.000168549	0.000597907	0	0.00147717	0.000765257	0.00141924	0.00288779	0.0014771	0.00188235	0.000430849	0	0	0	0.000444972	0	0	0.000948587	0.00561798	0.000574053	0	0.00569861	0.000624142	0.00137174	0.000170242	0.00181928	0.000167743	0.000470494	0	0	0	0	0	0	0	6.21048e-07	2.90765e-05
Unclassified	0	0	0	0	0	0	0	0	0	0.000412541	0	0	0	0	0	0	0.000444972	0	0	0.000189717	0	0.000191351	0	0.00126636	0	0	0	0	0	0	0	0	0	0	0	0	0	0	0
Unclassified	0	0	0	0	0	0	0	0	0	0	0	0	0	0	0	0	0.000444972	0	0	0	0.000267523	0.000382702	0	0.00021106	0	0	0	0	0	0	0.0029109	0	0	0	0	0	0	0	0
Unclassified	0	0	0	0	0	0	0	0	0	0	0	0	0	0	0	0	0	0	0	0	0	0	0	0	0.000124828	0	0	0	0	1.17624e-05	0	0	0	0	0	0	0	0	0
Unclassified	0	0	0	0	0	0	0	0	0	0	0	0	0	0	0	0	0.00400475	0.0108696	0.00643863	0.00455322	0.00187266	0.0116724	0.0013708	0.00126636	0.00287105	0.00117578	0.000340483	0.00464928	2.79572e-05	0.00265829	0.00916166	0	0.000122215	0	0	0	0	0	0
Unclassified	0	0	0	0	0	0	0	0	0	0	0	0	0	0	0	0	0	0	0	0	0	0	0	0	0	0	0.000170242	0	0	0	0	0	0	0	0	0	0	0	0
Unclassified	0	0.00149421	0.00232072	0.000337098	0.000298954	0	0.00923228	0.000956572	0.000283849	0	0.000984737	0.000470588	0.00129255	0	0	0	0	0	0	0	0	0.000191351	0	0	0	0	0	0	0	0.000117624	0.00205295	0	0	0	7.08316e-07	0	0	0	0.000174459
Unclassified	0	0.00373552	0.00092829	0.000842744	0.000597907	6.99154e-05	0.00213368	0.0197054	0.00170309	0.0132013	0.000492368	0.008	0.000430849	0	0	0	0	0	0	0	0	0	0	0	0	0	0	0	2.79572e-05	0.000311702	0	0	0	0	0	0	0	0	0.000261689
Unclassified	0	0	0	0	0	0	0	0	0	0	0	0	0	0	0	0	0	0	0	0	0	0	0	0	0.000124828	0	0	0	0	0	0	0	0	0	0	0	0	0	0
Unclassified	0	0	0	0	0	0	0	0	0	0	0	0	0	0	0	0	0	0	0	0	0	0	0	0	0.000124828	0	0	0	0	0	0	0	0	0	0	0	0	0	0
Unclassified	0	0	0	0	0	0	0	0	0	0	0	0	0	0	0	0	0	0	0	0	0	0	0	0	0	0	0	0	0.000447315	0	0	0	0	0	0	0	0	0	2.90765e-05
Unclassified	0	0.00112066	0	0	0	6.99154e-05	0.000533421	0.000956572	0.000851547	0.000412541	0.00344658	0.000470588	0.000430849	0	0	0	0	0	0	0	0	0	0	0	0.00112346	0	0	0	0.000377422	0.000147029	0	0	1.52769e-05	0	0	0	0	0	5.81531e-05
Unclassified	0	0	0	0.000168549	0	0	0	0	0	0.000412541	0.000492368	0	0	0	0	0	0	0	0	0	0	0	0	0	0	0	0	0	0	0	0	0	0	0	0	0	0	0	0
Unclassified	0	0.000373552	0	0	0	0	0.000123097	0.000382629	0	0	0	0	0	0	0	0	0	0	0	0	0	0	0	0	0	0	0	0	0.000866672	0	0.010326	0.000972552	0.00342203	0	0	0	0	0	0
Unclassified	0	0	0	0	0	0	8.20647e-05	0	0.000567698	0	0.000492368	0	0	0	0	0	0	0	0	0	0	0	0	0	0	0	0	0	0	1.76435e-05	0	0	0	0	0	0	0	0	0
Unclassified	0	0	0	0.000168549	0	0	0.000123097	0.000573943	0	0.000412541	0.000492368	0	0	0	0	0	0	0	0	0	0	0	0	0	0	0	0	0	0	0	0	0	0	0	0	0	0	0	2.90765e-05
Unclassified	0	0	0	0	0	0	0	0	0	0	0	0	0	0	0	0	0	0	0	0	0	0	0	0	0	0	0	0	0.0001957	0	0	0	0	0	0	0	0	0	0
Unclassified	0	0	0	0	0	0	0	0	0	0	0	0	0	0	0	0	0	0	0	0	0	0	0	0	0	0	0	0	0.000125807	0	0	0	0	0	0	0	0	0	0
Unclassified	0	0.000373552	0.000696217	0.000505646	0	0	0.000328259	0.00153051	0.00198694	0.000412541	0.0014771	0	0.000430849	0	0	0	0	0	0	0	0	0	0	0	0	0	0	0	0.000615058	0	0	0	0	0	0	0	0	0	0
Unclassified	0	0	0	0	0.000298954	0	8.20647e-05	0.00172183	0	0.000412541	0.000492368	0.000470588	0	0	0	0	0	0	0	0	0	0	0	0	0	0	0	0	0.002614	0	0	0	0	0	0	0	0	0	0
Unclassified	0	0	0	0	0	0	0	0	0	0	0	0	0	0	0	0	0	0	0	0	0	0	0	0	0	0	0	0	1.39786e-05	0	0	0	0	0	0	0	0	0	0
Unclassified	0	0.000373552	0	0	0	0	4.10324e-05	0	0	0.00206271	0.000492368	0	0	0.00266223	0	0	0	0	0	0	0	0	0	0	0	0	0	0	0	0	0	0	0	0	0	0	0	0	0
Unclassified	0	0.000373552	0.000232072	0	0	0	0	0	0	0.00206271	0.000492368	0	0	0	0	0	0	0	0	0	0	0	0	0	0	0	0	0	4.19358e-05	0.000164673	0	0	9.16615e-05	0	0	0	0	0	5.81531e-05
Unclassified	0	0	0	0	0	0	0	0	0	0	0	0	0	0	0	0	0	0	0	0	0	0	0	0	0	0	0	0	0	0	0	0	0.000190961	0	0	0	0	0	0
Unclassified	0	0	0	0	0	0	0	0	0	0	0	0	0	0	0	0	0	0	0	0	0	0	0	0	0	0	0	0	0.00479465	0.011827	0.00091923	0.00940134	0.0103883	0	0	0	0	0	8.72296e-05
Unclassified	0	0	0	0.000505646	0	0	0	0.000191314	0	0	0	0	0	0	0	0	0	0	0	0	0	0	0	0	0	0	0	0	0.00134194	0	0.00101115	0	0	0	0	0	0	0	5.81531e-05
Unclassified	0	0	0	0	0	0	0	0	0	0	0	0	0	0	0	0	0	0	0	0	0	0	0	0	0	0	0	0	0.00377422	0.00199372	0.00110308	0.0075643	0.00166518	0	0	0	0	0	2.90765e-05
Unclassified	0	0	0	0	0	0	0	0.0013392	0	0	0	0	0	0	0	0	0	0	0	0	0	0	0	0	0	0	0	0	0.00279572	0.00198784	0.00274237	0.00648368	0.00162699	0	0	0	0	0	2.90765e-05
Unclassified	0	0	0	0	0	0	0	0	0	0	0	0	0	0	0	0	0	0	0	0	0	0	0	0	0	0	0	0	0.00219464	3.52871e-05	0	0.00259347	0.00511777	0	0	0	0	0	0
Unclassified	0	0	0	0	0	0	0	0	0	0	0	0	0	0	0	0	0	0	0	0.000379435	0	0	0	0	0	0	0	0	0	0	0	0	0	0	0	0	0	0	0
Unclassified	0	0	0	0	0	0	0	0.000191314	0	0	0	0	0	0	0	0	0	0	0	0	0	0	0	0	0	0	0	0	0	0	0	0	0	0	0	0	0	0	0
Unclassified	0	0	0	0	0	0	0	0	0	0	0	0	0	0	0	0	0	0	0	0	0	0	0	0	0	0	0	0	0	0	0	0	0	2.97446e-06	0.000133872	0.00644085	0.00290785	0.00165882	0
Unclassified	0	0	0	0	0	0	0	0	0	0	0	0	0	0	0	0	0	0	0	0	0	0	0	0	0	0	0	0	0	0	0.00214487	0	0	0	0	0	0	0	0
Unclassified	0	0	0	0	0	0	0	0	0	0	0	0	0.000430849	0	0	0	0	0	0	0	0	0	0	0	0	0	0	0	0	0	0	0	0	0	0	0	0	0	0
Unclassified	0	0.000747105	0	0.000168549	0	0	4.10324e-05	0	0.000567698	0.00206271	0	0.000470588	0	0	0	0	0	0	0	0	0	0	0	0	0.000249657	0	0	0	0	3.52871e-05	0	0	0.0022839	8.32849e-05	0	1.05157e-06	0	0	0.0163119
Unclassified	0	0	0	0	0	0	0	0	0	0	0	0	0	0	0	0	0.000148324	0	0	0	0.000267523	0	0	0	0	0	0	0	0	0	0	0	0	0	0	0	0	0	0
Unclassified	0	0	0	0	0	0	0	0	0	0	0	0	0	0	0	0	0	0	0	0	0	0	0	0	0	0	0	0	0	0	0	0.00129674	0	0	0	0	0	0	0
Unclassified	0	0	0	0	0	0	0	0	0	0	0	0	0	0	0	0	0	0	0	0	0	0	0	0	0	0	0	0	0	0	0	0	0	1.48723e-06	5.66653e-06	0.00105472	0.00196517	0	0
Unclassified	0	0	0	0.000168549	0.000597907	0	8.20647e-05	0.00420892	0.000567698	0.00165017	0.000492368	0	0.000430849	0	0	0	0	0	0	0	0	0	0	0	0	0	0	0	0	0	0	0	0	0	0	0	0	0	0
Unclassified	0	0.00448263	0.00765839	0.0247767	0.00209268	6.99154e-05	8.20647e-05	0.00440023	0.0127732	0.00577558	0.00443131	0.0112941	0.0155106	0	0	0	0	0	0	0.000189717	0	0	0.000514051	0	0	0	0	0	0.000139786	1.17624e-05	0.000352372	0.000108061	0	7.43615e-07	4.95821e-06	0.000247118	2.20125e-06	2.11156e-05	0.000290765
Unclassified	0	0.000373552	0	0.000168549	0.000896861	0	0	0.000191314	0.000567698	0.000825083	0.00246184	0	0.000430849	0	0	0	0	0	0	0	0	0	0	0	0	0	0	0	1.39786e-05	0	0.00200699	0.000972552	0	2.23084e-06	0	0	0	2.67051e-05	8.72296e-05
Unclassified	0	0.00298842	0.00092829	0.00522501	0.000597907	6.99154e-05	0.000164129	0.00344366	0.00681238	0.00742574	0.00590842	0.0103529	0.00947867	0	0	0	0.00103827	0.0222066	0.00261569	0	0.000267523	0.00267891	0	0.000844238	0.00074897	0.00137174	0.00187266	0.00404285	0.000209679	3.52871e-05	4.59615e-05	0	1.52769e-05	5.2053e-06	1.48746e-05	6.3094e-06	4.4025e-06	3.8505e-05	0.000348918
Unclassified	0	0	0	0	0	0	0	0	0	0	0	0	0	0	0	0	0	0	0	0	0	0	0	0	0	0	0	0	0	0	0	0	0	0	7.08316e-07	0	0	1.2421e-06	0
Unclassified	0	0	0	0	0	0	0	0	0.000283849	0	0	0	0	0	0	0	0	0	0	0	0	0	0	0	0	0	0	0	0	0	0	0	0	0	0	0	0	6.21048e-07	0
Unclassified	0	0	0.000232072	0.000168549	0	0	0	0	0	0	0	0	0	0	0	0	0.00163156	0.0197522	0.00442656	0.00132802	0.000802568	0.00363567	0.0736806	0.00295483	0.00337037	0.00254752	0.000851209	0.00384071	0	0.000141148	0	0	0.000290261	2.23084e-06	5.66653e-06	3.1547e-06	1.10063e-06	6.21048e-07	2.90765e-05
Unclassified	0	0	0	0	0	6.99154e-05	0	0	0	0	0	0	0	0	0	0	0	0	0	0	0	0	0	0	0.000124828	0	0	0	0	0	1.53205e-05	0	0	0.00016657	7.15399e-05	2.10313e-06	2.75156e-06	0.00275994	0
Unclassified	0	0	0	0	0	0	0	0	0	0	0	0	0	0.00599002	1.76982e-05	0	0.000148324	0.000233754	0.000804829	0	0	0.00191351	0	0.000422119	0	0	0	0.000606428	0	0	0.00061282	0	5.34692e-05	2.45393e-05	8.49979e-06	2.10313e-06	5.50313e-07	0.000304935	0
Unclassified	0	0	0	0	0	0	0	0	0	0	0	0	0	0	0	0	0	0	0	0	0	0	0	0	0	0.000195963	0.000170242	0	0	0	0	0	0	0	0	0	0	0	0
Unclassified	0	0	0	0.000168549	0	0	0	0.000191314	0.000851547	0	0	0	0	0	0	0	0	0	0	0	0	0	0	0	0	0	0	0	0	0	1.53205e-05	0	0	1.26415e-05	9.20811e-06	0	0	0.000240967	2.90765e-05
Unclassified	0	0	0	0	0	0	0	0	0	0	0	0	0	0	0	0	0	0	0	0	0	0	0	0	0	0	0	0	0	0	0	0	0	7.43615e-07	0	0	0	6.21048e-07	0
Unclassified	0	0	0	0	0	0	0	0	0	0	0	0	0	0	0	0	0	0	0	0	0	0	0	0	0	0	0	0	0	0	0	0	0	0.000101875	4.53322e-05	8.41253e-06	5.50313e-07	0	0
Unclassified	0	0	0	0	0	0	0	0	0	0	0	0	0	0	0	0	0	0.000584385	0.000201207	0	0	0	0	0	0	0.000195963	0.000340483	0.000202143	0	0	0	0	0	5.2053e-06	5.66653e-06	0	0	0.000148431	0
Unclassified	0	0	0	0	0	0	0	0	0	0	0	0	0	0	0	0	0	0	0	0	0	0	0	0	0	0	0	0	0	0	0	0	0	0	7.08316e-07	0	0	0	0
Unclassified	0	0.00224131	0.0218148	0.000505646	0.00239163	0.000139831	0.000123097	0.000573943	0.000567698	0.00330033	0.0014771	0.00188235	0.000430849	0	1.76982e-05	0	0.00252151	0.000233754	0	0.000379435	0.00107009	0	0.00017135	0.000422119	0.00249657	0.000979816	0.00306435	0.00950071	0	0	1.53205e-05	0	0	0.0699154	0.0721562	0.0727831	0.052119	0.0892198	0.000319842
Unclassified	0	0	0	0	0	0	0	0	0	0	0	0	0	0	0	0	0.000148324	0	0	0	0	0	0	0	0	0	0	0	0	0	0	0	0	0.00989826	0.000763565	0.00435454	0.000215172	0.020253	0
Unclassified	0	0.00149421	0.00487352	0.000337098	0.000597907	0	0.000123097	0.000382629	0	0.00123762	0.000984737	0.000941176	0.000430849	0	0	0	0	0	0	0	0.000267523	0	0	0.00021106	0.000499313	0.000195963	0.000170242	0	0	0	0	0	0	0.00142551	0.00364287	0.0402161	0.017747	0.00969332	0.000203536
Unclassified	0	0	0	0	0	0	0	0	0	0	0	0	0	0	0	0	0	0	0	0	0	0	0	0	0	0	0.000170242	0	0	0	0	0	0	0	0	0	0	0	0
Unclassified	0	0	0	0	0	0	0	0	0	0	0	0	0	0	0	0	0	0	0	0	0	0	0	0	0	0	0	0	0	0	0	0	0	0	7.08316e-07	0	0	0	0
Unclassified	0	0.00224131	0.0199582	0.000674195	0.000597907	0.000279662	0.000164129	0.000956572	0.000851547	0.00206271	0.00393895	0.000941176	0.00129255	0	0	0	0.0345595	0.00140252	0.000201207	0.0218175	0.00133761	0.00688863	0.00154215	0.00337695	0.00998627	0.00235156	0.0175349	0.00525571	0	5.88118e-05	0	0	0	0.104484	0.0951077	0.0654274	0.1637	0.0326454	0.000319842
Unclassified	0	0	0	0	0	0	0	0.000191314	0	0	0	0	0	0	0	0	0	0	0	0	0	0	0	0	0	0	0	0	2.79572e-05	0	0	0	7.63846e-06	3.04882e-05	9.49144e-05	0.000254479	3.41194e-05	7.39047e-05	2.90765e-05
Unclassified	0	0.00112066	0.0336505	0.000505646	0.00269058	0.000559323	0.000205162	0.000956572	0.00141924	0.00536304	0.00393895	0.00282353	0.00129255	0	0	0	0.000889944	0	0	0.00360463	0.00722311	0	0	0.00021106	0.00074897	0.000391926	0.000170242	0.004245	0	0	0	0	0	6.24637e-05	7.29566e-05	8.728e-05	0.000452908	5.77575e-05	0.00066876
Unclassified	0	0.00821815	0.0740311	0.00151694	0.00179372	0.000838985	0.000369291	0.00153051	0.00539313	0.00453795	0.00640079	0.00329412	0.00129255	0	0.000601738	0.000451671	0	0	0	0	0	0	0.0003427	0	0.00074897	0.000195963	0	0	0	0	0	0	0	0.115137	0.101214	0.0942793	0.0620599	0.11234	0.000290765
Unclassified	0	0	0.000696217	0	0.000298954	0	0	0	0	0	0.000492368	0	0	0	0	0	0.000889944	0	0.000201207	0.000569152	0.0034778	0	0	0	0.000249657	0.000587889	0.00238338	0.000404285	0	0	0	0	0	0.00534659	2.9041e-05	0.000519474	0.00122445	8.50836e-05	0
Unclassified	0	0.000373552	0.0025528	0.000168549	0.000298954	0.000139831	0	0	0	0.000412541	0.0014771	0	0.000430849	0	0	0	0.000148324	0	0	0.000569152	0.00160514	0.000191351	0.000514051	0.00147742	0.000249657	0.000587889	0.000170242	0.000404285	0	0	0	0	0	0.0013452	0.00154696	0.00246698	0.000696146	0.0045765	0.000203536
Unclassified	0	0	0	0	0	0	0	0	0	0	0	0	0.000430849	0	0	0	0	0	0	0	0	0	0	0	0	0	0	0	0	0	0	0	0	7.43615e-07	0	1.57735e-05	3.30188e-06	0	0
Unclassified	0	0	0	0	0	0	0	0	0	0	0	0	0	0	0	0	0	0	0	0	0	0	0.00017135	0	0.000124828	0	0	0	0	0	0	0	0	0	0	0	0	0	0
Unclassified	0	0	0	0	0	0	0	0	0	0	0	0	0	0	0	0	0	0	0	0	0	0	0	0	0	0	0.000170242	0	0	0	0	0	0	0	0	0	0	0	0
Unclassified	0	0	0	0	0	0	0	0	0	0	0	0	0	0	0	0	0	0	0	0	0	0	0	0	0	0	0	0	0	0	0	0	0	0	0	1.26188e-05	5.50313e-07	0	0
Unclassified	0	0	0	0	0	0	0	0	0	0	0	0	0	0	0	0	0	0	0	0	0	0	0	0.00021106	0	0	0	0	0	0	0	0	0	7.43615e-07	0	0	0	0	0
Unclassified	0	0	0	0	0	0	0	0	0	0	0	0	0	0	0	0	0.00845446	0	0	0.000379435	0	0	0	0	0	0	0.000510725	0.000404285	0	0	0	0	0	0	0	0	0	0	0
Unclassified	0	0	0	0	0	0	0	0	0	0	0	0	0	0	0	0	0	0	0	0	0	0	0	0	0	0	0	0	0.000251615	5.29306e-05	0	0.000216123	0.0021846	0	0	0	0	0	8.72296e-05
Unclassified	0	0	0	0	0	0	0	0	0.000283849	0	0	0	0	0	0	0	0	0	0	0	0	0	0	0	0	0	0	0	0	0.000241128	0	0	0	0	0	0	0	0	0
Unclassified	0	0	0	0.000168549	0	0	0	0	0	0.000412541	0.000492368	0	0	0	0	0	0	0	0	0	0	0	0	0	0	0	0	0	0.000279572	0	0	0	0	0	0	0	0	0	0
Unclassified	0	0.00747105	0.000232072	0	0.000298954	0	0	0	0.000283849	0.000412541	0	0.000470588	0	0	0	0	0	0	0	0	0	0	0	0	0	0	0	0	0	0	0.00145545	0.000216123	0	0	0	0	0	0	0
Unclassified	0	0.000373552	0	0.000337098	0.000597907	0	0.000820647	0.00114789	0.000567698	0.000825083	0.000492368	0.00376471	0.0017234	0	0	0	0	0	0	0	0	0	0	0	0	0	0	0	0.000111829	0	0	0.000108061	3.05538e-05	0	0	0	0	0	0
Unclassified	0	0	0	0	0	0	0	0	0	0	0	0	0	0	0	0	0	0	0	0.000189717	0	0	0	0	0	0	0	0	0	0	0	0	0	0	0	0	0	0	0
Unclassified	0	0	0	0	0	0	0	0	0	0	0	0	0	0	0	0	0	0	0	0	0	0	0	0	0.000124828	0	0	0	0	0	0	0	0	0	0	0	0	0	0
Unclassified	0	0	0	0	0	0	0	0	0	0	0	0	0	0	0	0	0	0	0	0	0	0	0	0	0	0	0	0	0	0	0	0	0	0.000382218	6.37485e-06	0.000195591	4.95282e-06	0.00274876	0
Unclassified	0	0	0	0	0	0	0	0	0	0	0	0	0	0	0	0	0	0	0	0	0	0	0	0	0	0	0	0	0	0	0	0	0	0.000648432	0	0.000450071	0	0	0
Unclassified	0	0	0	0	0	0	0	0	0	0	0	0	0	0	0	0	0	0	0	0	0	0	0	0	0	0	0	0	0.00733876	0.00218192	0.00572987	0.00248541	0.0560204	0	0	0	0	0	2.90765e-05
Unclassified	0	0.00410908	0.000232072	0.000168549	0	0	0	0	0	0	0	0	0	0	0	0	0	0	0	0	0	0	0	0	0	0	0	0	0	0	0	0	0	0	0	0	0	0	0
Unclassified	0	0	0	0.000168549	0	0	0	0	0	0	0	0	0	0.00499168	0	0	0	0	0	0	0	0	0	0	0	0	0	0	9.78501e-05	0.000664573	0	0.000540307	0.00124507	0	0	0	0	0	0
Unclassified	0	0	0	0	0	0	0	0	0	0	0	0	0	0	0	0	0.000148324	0	0	0	0	0	0	0	0	0	0	0	0	0	0	0	0	0	0	0	0	0	0
Unclassified	0	0	0	0	0	0	0	0	0	0	0	0	0	0	0	0	0.000889944	0.00128565	0.00100604	0.00151774	0.000267523	0.000191351	0	0.0010553	0	0.000195963	0.000170242	0	0	0	0	0	0	0	0	0	0	0	0
Unclassified	0	0.000373552	0	0	0.000298954	0	0	0	0	0	0	0	0.0017234	0	0	0	0	0	0	0	0	0	0	0	0	0	0	0	0	0	0	0	0	0	0	0	0	0	0
Unclassified	0	0	0	0.000168549	0	0	0	0.00114789	0.000283849	0	0.000492368	0	0	0	0	0	0	0	0	0	0	0	0	0	0	0	0	0	2.79572e-05	0	0	0	0	0	0	0	0	0	2.90765e-05
Unclassified	0	0	0	0.000168549	0	0	0	0	0.000567698	0	0	0	0	0	0	0	0	0	0	0	0	0	0	0	0	0	0	0	0	0	0	0	0	0	0	0	0	0	0
Unclassified	0	0.00298842	0	0.000168549	0.0143498	0.000139831	0	0.0040176	0.00851547	0.00288779	0.00492368	0.000470588	0.0271435	0	0	0	0	0	0	0	0	0	0	0	0	0	0	0	0	0.000405801	0	0	0	0	0	0	0	0	2.90765e-05
Unclassified	0	0	0	0	0	0	0	0	0.000283849	0	0	0	0.000430849	0	0	0	0	0	0	0	0	0	0	0	0	0	0	0	0	0	0	0	0	0	0	0	0	0	0
Unclassified	0	0.000747105	0.000232072	0.000168549	0.000298954	0.000139831	8.20647e-05	0.0531854	0.00141924	0.00123762	0.00196947	0.000470588	0	0	0	0	0	0	0	0	0	0	0	0	0	0	0	0	0.000153764	0.000358752	0	0	0	0	0	0	0	0	5.81531e-05
Unclassified	0	0.000373552	0	0	0.000298954	0	0	0.000382629	0.000283849	0.000412541	0.000492368	0.00141176	0	0	0	0	0	0	0	0	0	0	0	0	0	0	0	0	0.000125807	0.000129386	0	0.000108061	0.00100064	0	0	0	0	0	5.81531e-05
Unclassified	0	0.00261487	0	0	0	0	8.20647e-05	0.000382629	0	0.000412541	0.000492368	0	0.00689358	0	0	0	0	0	0	0	0	0	0	0	0	0	0	0	0	0	0	0	6.87461e-05	0	0	0	0	0	2.90765e-05
Unclassified	0	0.000373552	0.00092829	0.000168549	0.00119581	0	0.00336465	0.00344366	0.00227079	0	0.0014771	0.000470588	0	0	0	0	0	0	0	0	0	0	0	0	0	0	0	0	0.000894629	0.000641048	0	0.000864491	0.00118396	0	0	0	0	0	5.81531e-05
Unclassified	0	0	0	0	0	0	0	0.000191314	0	0	0	0	0	0	0	0	0	0	0	0	0	0	0	0	0	0	0	0	0	0	0	0	0	0	0	0	0	0	0
Unclassified	0	0	0	0.000168549	0	6.99154e-05	0	0	0	0	0	0	0	0	0	0	0	0	0	0	0	0	0	0	0	0	0	0	0	0	0	0	0	0	0	0	0	0	0
Unclassified	0	0	0	0	0	0	0	0	0	0	0	0	0	0	0	0	0	0	0	0	0	0	0	0	0	0	0	0	0	0	3.0641e-05	0	0	0	0	0	0	0	0
Unclassified	0	0	0	0	0	0	0	0	0	0	0	0	0	0	0	0	0	0	0	0	0	0	0	0	0	0	0	0	0	0	0	0	0	0	6.37485e-06	0.000219777	1.26572e-05	0	0
Unclassified	0	0	0	0	0	0	0	0.000191314	0	0	0	0	0	0	0	0	0	0	0	0	0	0	0	0	0	0	0	0	0	0	0	0	0	0	0	0	0	0	0
Unclassified	0	0	0	0	0	0	0	0	0	0	0	0	0	0	0	0	0	0	0	0	0	0	0	0	0	0	0	0	0	5.88118e-06	0	0	0	0	0	0	0	0	0
Unclassified	0	0	0	0.000337098	0	0	8.20647e-05	0.000191314	0	0.00412541	0.000492368	0	0	0	0	0	0	0	0	0	0	0	0	0	0	0	0	0	0	0.000446969	0.00108776	0	0	0	0	0	0	0	0
Unclassified	0	0	0	0	0	0	0	0	0	0	0	0	0	0	0	0	0	0	0	0	0	0	0	0	0	0	0	0	0	0	0	0	0	0	1.41663e-06	0	0	0	0
Unclassified	0	0	0	0	0	0	0	0	0	0	0	0	0	0	0	0	0	0	0	0	0	0	0	0	0	0	0	0	0	0	0.000107244	0	0	0	0	0	0	0	0
Unclassified	0	0	0	0	0	0	0	0	0	0.000412541	0	0	0	0	0	0	0	0	0	0	0	0	0	0	0	0	0	0	1.39786e-05	0	0	0	0	0	0	0	0	0	0
Unclassified	0	0	0	0	0	0	0	0	0	0	0	0	0	0	0	0	0	0	0	0	0	0	0	0	0	0	0	0	0.000517208	1.76435e-05	0	0.000648368	0	0	0	0	0	0	0
Unclassified	0	0	0	0	0	0	0	0	0	0	0	0	0	0	0	0	0	0	0	0	0	0	0	0	0	0	0	0	0	0	0.000352372	0	0	0	0	0	0	0	0
Unclassified	0	0	0	0	0.000298954	0	0.000205162	0.000191314	0.000283849	0	0.000492368	0.000470588	0	0	0	0	0	0	0	0	0	0	0	0	0	0	0	0	0	0	0	0	0	0	0	0	0	0	0
Unclassified	0	0.00933881	0.00742632	0.136356	0.113602	0.000419492	0.00307743	0.0308016	0.0945217	0.025165	0.01871	0.0174118	0.0525636	0	0	0	0	0	0	0	0	0	0	0	0.000124828	0	0	0	4.19358e-05	0	0.000183846	0	0	0	0	0	0	0	0.000436148
Unclassified	0	0	0	0	0	0	0	0	0	0	0	0	0	0	0	0	0	0	0	0	0	0	0	0	0	0	0	0	0	0	0.000260449	0	7.63846e-06	0	0	0	0	0	0
Unclassified	0	0	0	0	0	0	8.20647e-05	0	0	0.000412541	0	0	0	0	0	0	0	0	0.000402414	0	0	0	0	0	0	0	0	0	0	5.88118e-06	0	0	0	0	0	0	0	0	0
Unclassified	0	0	0	0	0	0	0	0	0	0	0	0	0	0	0	0	0	0	0	0	0	0	0	0	0	0	0	0	0	0.000688098	0.00170058	0	0	0	0	0	0	0	0
Unclassified	0	0.000373552	0	0	0	6.99154e-05	8.20647e-05	0.000191314	0	0	0	0	0	0	0	0	0	0	0	0	0	0	0	0.00021106	0.000499313	0	0	0	0.000615058	0.00152911	0.00029109	0.000216123	0.00176448	0	7.79148e-06	4.20627e-06	9.35532e-06	1.92525e-05	0
Unclassified	0	0.000747105	0.00116036	0.000505646	0.0146487	6.99154e-05	0.000615486	0.000573943	0	0.00123762	0	0	0	0	0	0	0	0	0	0	0	0	0	0	0	0	0	0	0	0	6.1282e-05	0	0	0	1.06247e-05	2.52376e-05	4.89778e-05	1.11789e-05	8.72296e-05
Unclassified	0	0	0	0	0	0	0	0	0	0	0	0	0	0	0	0	0	0	0	0	0	0	0	0	0	0	0	0.000202143	0	5.88118e-06	0.00211423	0	0.00102355	0	2.76243e-05	7.99191e-05	0.00012382	4.78207e-05	0
Unclassified	0	0	0	0.000168549	0	6.99154e-05	0.000451356	0.000191314	0	0	0	0	0.000430849	0	0	0	0	0	0	0	0	0	0	0	0	0	0	0	0	0	1.53205e-05	0	0	0	2.12495e-06	1.05157e-06	5.50313e-07	1.86314e-06	2.90765e-05
Unclassified	0	0	0	0	0	0	0	0	0	0	0	0	0	0	0	0	0	0	0	0	0	0	0	0	0	0	0	0	0	0	0	0	0	0	0	0	0	2.48419e-06	0
Unclassified	0	0	0	0	0	0	0	0	0	0	0	0	0	0	0	0	0	0	0	0	0	0	0	0	0	0	0	0	0	0	0	0	0	0	7.08316e-07	1.05157e-06	3.85219e-06	6.21048e-07	0
Unclassified	0	0.000373552	0	0	0.000298954	0	0	0	0	0	0	0	0	0	0	0	0	0	0	0.000189717	0	0	0	0	0	0	0	0	0	0	0	0	0	0	7.08316e-07	1.05157e-06	0	0	0
Unclassified	0	0	0	0	0	0	0	0	0	0	0	0	0	0	0	0	0	0	0	0	0	0	0	0	0	0	0	0	0	0	0	0	0	0	7.79148e-06	0	3.30188e-06	6.21048e-07	0
Unclassified	0	0	0.000232072	0	0.000298954	0.0009089	8.20647e-05	0	0	0.000412541	0	0	0.000430849	0	0	0	0	0	0	0	0	0	0	0	0	0	0	0	6.98929e-05	8.82177e-05	1.53205e-05	0	0	0	2.12495e-06	9.4641e-06	2.75156e-06	1.55262e-05	0.000348918
Unclassified	0	0	0.0136923	0.000168549	0	6.99154e-05	0.000492388	0.000573943	0.000283849	0	0	0.000470588	0	0	0	0	0	0	0	0	0	0	0	0	0.000624142	0	0	0	0	0	0	0	0	0	2.83326e-06	5.25783e-06	1.48584e-05	7.45258e-06	5.81531e-05
Unclassified	0	0	0	0.000168549	0	6.99154e-05	4.10324e-05	0.000191314	0	0.000412541	0.000984737	0.00611765	0.000430849	0	0	0	0	0	0	0	0	0	0	0	0	0	0	0	0	0	0	0	0	0	7.08316e-07	0	0	0	5.81531e-05
Unclassified	0	0	0	0	0	0	0	0	0	0	0	0	0	0	0	0	0	0	0	0	0	0	0	0	0	0	0	0	0	0.000376395	0	0.000108061	0.000252069	7.43615e-07	0	0	0	6.21048e-07	0
Unclassified	0	0	0	0	0	0	0	0	0	0	0.000492368	0	0	0	0	0	0	0	0	0	0.000267523	0	0	0	0.000249657	0	0	0	0	0	0	0	0	0	0	0	0	6.21048e-07	0
Unclassified	0	0	0	0	0	0	0	0	0	0	0	0	0	0	0	0	0	0	0	0	0	0	0	0	0	0	0	0	0	0	0	0	0	7.43615e-07	0	0	0	2.48419e-06	0
Unclassified	0	0	0.000232072	0	0	0	0	0	0	0	0	0	0	0	0	0	0	0	0	0	0	0	0	0	0	0	0	0	0	0	0	0	0	0.000145005	0.00133376	0.00425254	0.000380817	0.0072259	0
Unclassified	0	0	0	0	0	0	0	0.000382629	0.000283849	0	0	0	0	0	0	0	0	0	0	0	0	0	0	0	0	0	0	0	0	0	0	0	0	0	0	0	0	0	0
Unclassified	0	0	0	0	0	0	0	0	0	0	0	0	0	0	0	0	0	0	0	0	0	0	0	0	0	0	0	0	0	0	0	0	0	0	0	9.4641e-06	5.50313e-07	1.2421e-06	0
Unclassified	0	0	0	0	0.000298954	0	0	0	0	0	0	0	0	0	0	0	0	0	0	0	0	0	0	0	0	0	0	0	0	0	0.000107244	0	0	0	0	0	0	0	8.72296e-05
Unclassified	0	0.00149421	0	0	0	0	0.000533421	0	0.000283849	0.000412541	0.000492368	0.000470588	0.000430849	0	0	0	0	0	0	0	0	0	0	0	0	0	0	0	0	0	0	0	0	0	0	0	0	0	0
Unclassified	0	0.000747105	0.000464145	0.000168549	0.000298954	0	4.10324e-05	0.000382629	0	0	0.000492368	0.000941176	0.00646273	0	0	0	0	0	0	0	0	0	0	0	0	0	0	0	0	0	0	0	0	0	0	0	0	0	0
Unclassified	0	0.00149421	0.000232072	0.000168549	0.000896861	0	4.10324e-05	0.000382629	0.00198694	0.000412541	0	0.000470588	0	0	0	0	0	0	0	0	0	0	0	0	0	0	0	0	1.39786e-05	0	0	0	0	0	0	0	0	0	0.000174459
Unclassified	0	0	0	0	0	0	0	0	0.000283849	0	0	0	0	0	0	0	0	0	0	0	0	0	0	0	0	0	0	0	0	0	0	0	0	0	0	0	0	0	0
Unclassified	0	0.00747105	0.000232072	0.000337098	0	0	4.10324e-05	0.000573943	0.00170309	0	0.000492368	0.000470588	0.00258509	0	0	0	0	0	0	0	0	0	0	0	0	0	0	0	6.98929e-05	0	0	0	0	0	0	0	0	0	8.72296e-05
Unclassified	0	0	0	0	0	0	0	0	0	0	0	0	0	0	0	0	0	0	0	0	0	0	0	0	0.000124828	0	0	0	0	0	0	0	0	0	0	0	0	0	0
Unclassified	0	0.00373552	0.000232072	0.000337098	0.000298954	0	0.000574453	0.00153051	0.00198694	0.00412541	0.000984737	0.000470588	0.000430849	0	0	0	0	0	0	0	0	0	0	0	0	0	0	0	0.00257206	0.000188198	0.000321731	0	0.00177212	0	0	0	0	0	0.000116306
Unclassified	0	0	0	0	0	0	0	0	0	0	0	0	0	0	0	0	0	0	0	0	0	0	0	0	0	0	0	0	0	0	0	0	0	0	7.08316e-07	1.05157e-06	5.50313e-07	0	0
Unclassified	0	0.000747105	0	0	0	0	0.000123097	0	0	0	0	0	0	0	0	0	0	0	0	0	0	0	0	0	0	0	0	0	0	0	0	0	0	1.48723e-06	4.2499e-06	0	4.4025e-06	1.61473e-05	8.72296e-05
Unclassified	0	0	0	0	0.000298954	0	0	0	0	0	0	0	0	0	0	0	0	0	0	0	0	0	0	0	0	0	0	0	0	0	0	0	0	9.66699e-06	4.2499e-06	4.20627e-06	2.14622e-05	5.65154e-05	0
Unclassified	0	0	0	0	0	0	0	0	0	0	0	0	0	0	0	0	0	0	0	0	0	0	0	0	0	0	0	0	0	0	0	0	0	0	7.08316e-07	0	0	6.21048e-07	0
Unclassified	0	0	0	0	0	0	0	0	0	0	0	0	0	0	0	0	0	0	0	0	0	0	0	0	0.000124828	0	0	0	0	0	0	0	0	0	0	0	0	0	0
Unclassified	0	0	0	0	0	0	0	0	0	0	0	0	0	0	0	0	0	0	0.000201207	0.000379435	0	0	0	0.000633179	0	0	0	0	0	0	0	0	0	0	0	0	0	0	0
Unclassified	0	0	0	0	0	0	0	0	0	0	0	0	0	0	0	0	0	0	0	0	0	0	0	0	0	0	0	0	0	0	0	0	0	7.43615e-07	0	0	1.10063e-06	6.21048e-07	0
Unclassified	0	0	0	0	0	0	0	0	0	0	0	0	0	0	0	0	0	0	0	0	0	0	0	0	0.000249657	0	0	0	0	0	0	0	0	0	0	0	0	0	0
Unclassified	0	0.000373552	0	0	0	0	0	0	0	0	0	0	0	0	0	0	0	0	0	0	0	0	0	0	0	0	0	0	0	0	0	0	0	0	0	0	0	0	0
Unclassified	0	0	0	0	0	0	0	0	0	0.000412541	0	0	0	0	0	0	0	0	0	0	0	0	0	0	0.000998627	0	0	0	0	0	0	0	0	7.43615e-07	7.08316e-07	0	5.50313e-07	1.86314e-06	0
Unclassified	0	0	0	0	0	0.000279662	0	0	0.000283849	0	0.0014771	0.000470588	0	0	0	0	0	0	0	0	0	0	0	0	0	0	0	0	0	0	0	0	0	0	0	0	0	0	0.000407071
Unclassified	0	0	0	0	0	0	0	0.000382629	0	0.00123762	0	0	0	0	0	0	0	0	0	0	0	0	0	0	0.000124828	0	0	0	9.78501e-05	0	0	0	0	2.23084e-06	1.41663e-06	0	5.50313e-07	7.45258e-06	0
Unclassified	0	0	0	0	0	0	0	0	0	0	0	0	0	0	0	0	0	0	0	0	0	0	0	0	0.000499313	0	0	0	0	0	0.00154737	0	0	0	0	0	0	6.21048e-07	0.000203536
Unclassified	0	0.000373552	0.000464145	0.000337098	0	0	0	0	0	0.000412541	0.000492368	0.000470588	0.00129255	0	0	0	0	0.000116877	0.000603622	0	0	0.000191351	0.00017135	0	0.00162277	0.000783853	0.000170242	0.000404285	2.79572e-05	0	0.000536218	0	8.4023e-05	0.0191302	0.00482363	0.00058362	0.00467491	0.10606	0.00918818
Unclassified	0	0	0	0	0	0	0	0	0	0	0	0	0	0	0	0	0	0	0	0	0	0	0	0	0	0	0	0	0	0	0	0	0	0	0	7.36097e-06	0	0	0
Unclassified	0	0	0	0	0	0	0	0	0	0	0	0	0	0	0	0	0	0	0	0	0	0	0	0	0.000124828	0	0	0	0	0	0	0	0	0	0	0	0	0	0
Unclassified	0	0.000373552	0.00208865	0	0.000298954	6.99154e-05	0	0.000382629	0	0	0	0.000470588	0	0	0	0	0	0	0	0	0	0	0	0	0	0	0	0	0	0	0	0	0	0	0	0	0	0	0.000116306
Unclassified	0	0	0	0	0	0	0	0	0	0	0	0	0	0	0	0	0	0	0	0	0	0	0	0	0	0	0	0	0	0	0	0	0	0	0	1.05157e-06	0	0	0
Unclassified	0	0	0	0	0	0	0	0	0	0	0	0	0	0	0	0	0	0	0	0	0	0	0	0	0	0	0	0	0	0	0	0	0	0	0	0	0	6.21048e-07	0
Unclassified	0	0	0	0	0	0	0	0	0	0	0	0	0	0	0	0	0	0	0	0	0	0	0	0	0	0	0	0	0	0	0	0	0	0	0	0	0	6.21048e-07	0
Unclassified	0	0.000747105	0.000232072	0.000168549	0.000298954	0.000279662	0	0.000191314	0	0	0.000492368	0	0	0	0	0	0	0	0	0	0	0	0	0	0	0	0	0	0	0	0	0	0	0	0	0	5.50313e-07	0	0.00110491
Unclassified	0	0	0	0	0	0	0	0	0	0	0	0	0	0	0	0	0	0	0	0	0	0	0	0	0	0	0	0	0	0	0	0	0	1.48723e-06	0	0	0	6.21048e-07	0
Unclassified	0	0	0	0	0	0	0	0	0	0	0	0	0	0	0	0	0.00222486	0.000467508	0.00925553	0.000379435	0.00107009	0.00803674	0	0.0021106	0.0183498	0.0074466	0.00136193	0.00828785	0	0	0	0	0	0.000127158	3.54158e-06	4.73205e-05	3.13678e-05	0	0
Unclassified	0	0	0	0.000168549	0.000298954	0.000559323	0	0	0	0	0	0	0	0	0	0	0	0	0	0	0	0	0	0	0	0	0	0	0	1.76435e-05	6.1282e-05	0	7.63846e-06	0	0	1.05157e-06	1.10063e-05	1.2421e-06	5.81531e-05
Unclassified	0	0	0	0	0	0	0	0	0	0	0	0	0	0	0	0	0	0	0	0	0	0	0	0	0	0	0	0	0	0	0	0	0	0.00017475	7.72065e-05	7.36097e-06	4.01728e-05	0.000826615	0
Unclassified	0	0	0	0	0	0	0	0	0	0	0	0	0	0	0	0	0	0	0	0	0	0	0	0	0.00649107	0	0	0	0	0	0	0	0	0	0	0	5.50313e-07	6.21048e-07	0
Unclassified	0	0	0	0	0	0	0	0	0	0	0	0	0	0	0	0	0	0	0	0	0	0	0	0	0	0	0	0	0	0	0	0	0	0	0	0	0	1.86314e-06	0
Unclassified	0	0	0	0	0	0	0	0	0	0	0	0	0	0	0	0	0	0	0	0	0	0.000191351	0	0.00021106	0	0	0	0	0	0	0	0	0	0	0	0	0	0	0
Unclassified	0	0	0	0	0	0	0	0.000191314	0	0	0	0	0	0.000665557	7.07927e-05	0	0	0	0	0	0	0	0	0	0	0	0	0	4.19358e-05	2.94059e-05	1.53205e-05	0	0.000381923	0	0	0	0	6.21048e-07	2.90765e-05
Unclassified	0	0	0	0	0	0	0	0	0	0	0	0	0	0	0	0	0	0	0	0	0	0	0	0	0	0	0	0	0.000125807	0	0	0	0	0	0	0	0	0	0
Unclassified	0	0	0	0	0	0	0	0	0	0	0	0	0	0	0	0	0.000148324	0	0	0	0	0	0	0	0	0	0	0	0	0	0	0	0	0	0	0	0	0	0
Unclassified	0	0	0	0	0	0	0	0	0	0	0	0	0	0	0	0	0.000148324	0	0	0	0	0	0	0	0.0242167	0	0	0.001415	0	0	0	0	0	0	0	0	0	0	0
Unclassified	0	0	0	0	0	0	0	0	0	0	0	0	0	0	0	0	0	0	0	0	0.000267523	0	0	0.00021106	0	0	0	0	0	0	0	0	0	0	0	0	0	0	0
Unclassified	0	0	0	0	0	0	0	0	0	0	0	0	0	0	0	0	0	0	0	0	0	0	0	0	0	0	0	0	0	0	0	0	0	0	1.41663e-06	5.25783e-06	0	1.2421e-06	0
Unclassified	0	0	0	0	0	0	0	0	0	0	0	0	0	0	0	0	0	0	0	0	0	0	0	0	0	0	0	0	0	0	0	0	0	0	7.08316e-07	0	0	0	0
Unclassified	0	0	0	0	0	0	0	0	0	0	0	0	0	0	0	0	0.000593296	0	0.00261569	0	0	0.000191351	0.0013708	0	0.000873799	0.000391926	0.000170242	0	0	0	0	0	0	0	0	1.05157e-06	0	0	0
Unclassified	0	0	0	0	0	0	0	0	0	0	0	0	0	0	0	0	0	0	0	0	0	0	0.00017135	0	0	0	0	0.000202143	0	0	0	0	0	7.43615e-07	0	0	0	6.21048e-07	0
Unclassified	0	0	0	0	0	0	0	0	0	0	0	0	0	0	0	0	0	0	0	0	0	0	0	0	0.000998627	0.000391926	0.000170242	0.00121286	0	0	0	0	0	0	0	0	0	0	0
Unclassified	0	0	0	0	0	0	0	0	0	0	0	0	0	0	0	0	0	0	0	0	0	0	0	0	0	0	0.000170242	0	0	0	0	0	0	2.23084e-06	1.41663e-06	0	0	1.73893e-05	0
Unclassified	0	0	0	0	0	0	0	0	0	0	0	0	0	0	0	0	0	0	0	0	0.000267523	0	0	0	0	0	0	0	0	0	0	0	0	0	0.000642443	0.000728736	0	9.31572e-06	0
Unclassified	0	0.000373552	0.00232072	0.000168549	0	0	0	0	0.000283849	0	0	0	0	0	0	0	0	0	0	0.000189717	0	0	0	0	0.00212208	0.000195963	0.000170242	0.000606428	0	0	0	0	0	0.00475021	0.00913515	0.0180091	0.00152822	0.0223049	0
Unclassified	0	0	0	0	0	0	0	0	0	0	0	0	0	0	0	0	0	0	0	0	0	0	0	0	0	0	0	0	0	0	0	0	0	7.43615e-07	5.66653e-06	0.000189282	7.15407e-06	0.00379212	0
Unclassified	0	0.000373552	0.000232072	0	0	6.99154e-05	0	0.000191314	0.000567698	0	0.000492368	0	0	0	0	0	0	0	0	0	0	0	0	0	0	0	0	0	0	0	0	0	0	0	0	0	0	0	0
Unclassified	0	0	0	0	0	0	0	0	0	0	0	0	0	0	0	0	0	0	0	0	0	0	0	0	0	0	0	0	0	0	0	0	0	0	7.08316e-07	5.25783e-06	5.50313e-07	5.0926e-05	0
Unclassified	0	0	0	0	0	0	0	0	0	0	0	0	0	0	0	0	0	0	0	0	0	0	0	0	0	0	0	0	0	0	0	0	0	0.000304139	2.6916e-05	0.00159733	0	0	0
Unclassified	0	0	0	0	0	0	0	0	0	0	0	0	0	0	0	0	0	0	0	0	0	0	0	0	0	0	0	0	6.98929e-05	0	0	0	0	0	0	0	0	0	0
Unclassified	0	0	0	0.000168549	0	0	0	0.000382629	0	0	0	0	0	0	0	0	0	0	0	0	0	0	0	0	0	0	0	0	0	0	0	0	0	0	0	0	0	0	0
Unclassified	0	0.000373552	0	0	0.000298954	6.99154e-05	0	0.00114789	0.000851547	0.00453795	0.000984737	0.000470588	0	0	0	0	0	0	0	0	0	0	0	0	0	0	0	0	0	0	0	0	0	0	0	0	0	0	5.81531e-05
Unclassified	0	0.000373552	0	0	0	0	4.10324e-05	0.000573943	0	0	0.000492368	0	0	0.00133111	0	0	0	0	0	0	0	0	0	0	0	0	0	0	0	0	0	0	0	0	0	0	0	0	2.90765e-05
Unclassified	0	0	0	0	0	0	0	0	0	0	0	0	0	0	0	0	0	0	0	0	0	0	0	0	0	0	0	0	0	0	0	0	0	0	0	8.09706e-05	0	6.21048e-07	0
Unclassified	0	0	0	0	0	0	0	0	0	0	0	0	0	0	0	0	0	0	0.000201207	0.000189717	0	0	0	0	0	0	0	0	0	0	0	0	0	0	0	0	0	0	0
Unclassified	0	0.00298842	0	0	0	0	0	0.000191314	0.000283849	0	0.000492368	0	0	0	0	0	0	0	0	0	0	0	0	0	0	0	0	0	0	0	0	0	0	0	0	0	0	0	0
Unclassified	0	0	0	0	0	0	0	0	0	0	0	0	0	0	0	0	0	0	0	0	0	0	0	0	0	0	0	0	5.59143e-05	0	0	0	0	0	0	0	0	0	0
Ureibacillus	0	0	0	0.000337098	0	0	0	0.000191314	0.000567698	0.00206271	0	0	0	0	0	0	0	0	0	0	0	0	0	0	0	0	0	0	0	0	0	0	0	1.48723e-06	0	0	0	0	0
vadinCA11	0	0	0	0	0	0	0	0	0	0	0	0	0	0	0	0	0	0	0	0	0	0	0	0	0	0	0	0	0	0	0	0	0	0	0	1.05157e-06	0	0	0
Vagococcus	0	0	0	0.000168549	0	0	0	0	0	0	0	0.000470588	0	0	0	0	0.000296648	0.00198691	0.000603622	0	0	0.00114811	0	0	0.000499313	0.000783853	0.00153218	0.000808571	0	0	0	0	0	3.71807e-06	4.2499e-06	0	0	7.01784e-05	0
Varibaculum	0	0	0	0	0	0	0	0	0	0	0	0	0	0	0	0	0	0	0	0	0	0	0	0	0	0	0	0	0	0	0	0	0	7.43615e-07	3.54158e-06	6.09909e-05	0	0	0
Variovorax	0	0.000373552	0	0.000168549	0.00119581	0.00153814	4.10324e-05	0.000191314	0.000283849	0	0	0	0.000861698	0	0	0	0	0	0	0	0	0	0	0	0	0	0	0	0	0	0	0	0	0	0	0	0	0	0.000552454
Veillonella	0	0	0	0	0	0	0	0	0	0	0	0.000470588	0	0	0	0	0.0139425	0.0264142	0.0239437	0.0267501	0.00481541	0.0591274	0.0116518	0.0156184	0.0575459	0.236919	0.335376	0.0598342	0	0.000247009	1.53205e-05	0	0	0.000553993	0.000184871	0.000146168	3.79716e-05	9.68835e-05	0
Verrucosispora	0	0	0	0	0	0	0	0.000191314	0	0	0	0	0	0	0	0	0	0	0	0	0	0	0	0	0	0	0	0	0	0	0	0	0	0	0	0	0	0	0
Victivallis	0	0	0	0	0	0	0	0	0	0	0	0	0	0	0	0	0	0	0	0	0	0	0	0	0	0	0	0	0	0	0	0	0	1.78468e-05	5.66653e-06	0.00034912	3.02672e-05	0.00184141	0
Virgibacillus	0	0	0.000232072	0.000168549	0	0	0	0.000191314	0	0	0	0	0	0	0	0	0	0	0	0	0	0	0	0	0	0	0	0	0	0	0	0	0	0	0	0	0	0	2.90765e-05
Virgisporangium	0	0.0388495	0.0162451	0.000505646	0.00328849	0.000139831	0.00086168	0.00860914	0.00312234	0.0156766	0.000984737	0.00188235	0.0017234	0	0	0	0	0	0	0	0	0	0	0	0	0	0	0	0	0	0	0	0	0	0	0	0	0	0.000116306
Viridibacillus	0	0.000373552	0	0.000168549	0	0	0	0	0	0	0	0	0	0	0	0	0	0	0	0	0	0	0	0	0	0	0	0	0	0	0	0	0	0	0	0	0	6.21048e-07	0
Vogesella	0	0	0	0	0	0	0	0	0	0	0	0	0	0	0	0	0	0	0	0	0	0	0	0	0	0	0	0	0	0	0	0	0	0	0	0	5.50313e-07	0	0
WAL_1855D	0	0	0	0	0	0	0	0	0	0	0	0	0	0	0	0	0	0	0	0	0	0	0	0	0	0	0	0	0	0	0	0	0	7.43615e-07	1.98329e-05	5.36299e-05	0	1.86314e-06	0
Weissella	0	0	0	0	0	0	0	0	0	0	0	0	0	0	0	0	0	0	0	0	0	0	0	0	0	0	0	0	0	0	0	0	0	6.69253e-06	6.37485e-06	1.05157e-06	5.50313e-07	0	0
Xanthobacter	0	0	0	0	0	6.99154e-05	0	0	0.000567698	0	0	0	0	0	0	0	0	0	0	0	0	0	0	0	0	0	0	0	0	0	0	0	0	0	0	0	0	0	2.90765e-05
Xenorhabdus	0	0	0	0	0	0	0	0	0	0	0	0	0	0	0	0	0	0	0	0	0	0	0	0	0	0	0	0	0	0	0	0	0	0	0	0	0	1.2421e-06	0
Xylophilus	0	0.00112066	0	0	0	0	8.20647e-05	0	0	0	0.00196947	0	0	0	0	0	0	0	0	0	0	0	0	0	0	0	0	0	0	0	0	0	0	0	0	0	0	0	2.90765e-05
Yersinia	0	0	0	0	0	0	0	0	0	0	0	0	0	0	0	0	0	0	0	0	0	0	0	0	0	0	0	0	0	0	0	0	0	0	0	0	0	6.21048e-07	0
Zobellella	0	0	0	0	0	0	0	0	0	0	0	0	0	0	0	0	0	0	0	0	0	0	0	0	0	0	0	0	0	0	0	0	0	7.43615e-07	7.08316e-07	0	0	3.72629e-06	0
Zoogloea	0	0	0.000232072	0.000168549	0	0.000139831	0.000615486	0	0	0.000412541	0	0	0	0	0	0	0	0	0	0	0	0	0	0	0	0	0	0	0	0	0	0	0	0	0	0	0	6.21048e-07	0.000174459
